# Supplementary material for: Comprehensive Genomic Profiling of Rare Tumors: Routes to Targeted Therapies
Source: Front Oncol. 2020 Apr 21;10:536. doi: 10.3389/fonc.2020.00536 (PMC7186305; doi:10.3389/fonc.2020.00536)
Supplement: Supplementary file 4 [file Table_4.xlsx]

## Sheet: control
Supplementary table 4. QC data of the 1312 patients
sample ID	effective average sequencing depth	Fraction of effective bases on target	Effective bases on target	Total effective bases	Fraction of reads mapped to genome	Uniquely mapped reads on target	Total uniquely mapped reads	Mismatch rate of effective reads on target	Duplication rate of reads on target
RC0001	280	47.25%	399772958	846119552	99.38%	6247965	10613643	1.19%	30.63%
RC0002	298	50.46%	325175058	644458264	99.67%	5044013	8055065	0.87%	26.27%
RC0003	300	52.52%	428364927	815546728	99.72%	6675849	10356717	0.87%	27.77%
RC0004	299	50.80%	426130221	838771780	99.68%	7074171	11513284	0.29%	22.15%
RC0005	319	40.41%	348117553	861357780	99.46%	5390930	10749008	0.97%	15.03%
RC0006	299.95	47.43%	327281213	690030600	99.43%	5434629	9313668	1.12%	25.62%
RC0007	290	46.85%	316419325	675424160	99.64%	4956217	8436205	0.95%	20.90%
RC0008	296	55.65%	68038386	122269490	99.69%	1142918	1656760	0.29%	14.17%
RC0009	288.66	46.58%	314961581	676177460	99.42%	5207653	9090752	1.08%	27.57%
RC0010	367	45.49%	400795505	881058880	99.73%	6297913	10975122	0.91%	32.06%
RC0011	370	42.36%	403521205	952671780	99.59%	6297266	11819546	0.93%	31.99%
RC0012	296.68	59.04%	68064972	115292660	99.64%	1115982	1541552	0.95%	13.89%
RC0013	267.28	45.57%	291631824	640013220	99.38%	4834892	8567720	1.13%	24.94%
RC0014	296.23	52.63%	67963186	129137300	99.72%	1063661	1587060	0.98%	14.85%
RC0015	403	45.62%	439344460	963077080	99.50%	7335481	12975708	1.03%	24.47%
RC0016	436	53.71%	100002434	186196920	99.65%	1677506	2494449	0.95%	17.36%
RC0017	355	46.33%	387733649	836813460	99.74%	6481004	11249020	0.92%	30.92%
RC0018	304	49.92%	433669396	868741860	99.74%	7213751	11930371	0.21%	38.14%
RC0019	426	48.11%	97682770	203033740	99.60%	1642413	2734217	1.03%	14.83%
RC0020	386	54.03%	88463124	163718744	99.63%	1393864	2032996	0.98%	16.56%
RC0021	354	47.07%	386141998	820330630	99.45%	6451824	11034310	1.08%	22.33%
RC0022	413	44.87%	451055408	1005183752	99.51%	7062035	12507831	0.98%	31.18%
RC0023	297	10.65%	68028948	638957270	99.67%	1142916	8631384	0.26%	30.53%
RC0024	298	47.89%	324944571	678563264	99.61%	5092659	8470793	0.91%	28.95%
RC0025	299	52.84%	68602958	129837412	99.73%	1079954	1611702	0.86%	13.60%
RC0026	297	55.57%	68217968	122766770	99.75%	1136561	1659655	0.22%	20.92%
RC0027	292.28	46.57%	318913209	684761140	99.68%	5288252	9210632	0.93%	23.55%
RC0028	300	46.44%	327261757	704679850	99.49%	5472216	9483341	1.15%	21.73%
RC0029	296	54.86%	421805888	768908568	99.73%	6514697	9750814	0.20%	31.66%
RC0030	215	50.40%	306358143	607908700	99.66%	5095001	8276981	0.23%	29.09%
RC0031	289	51.98%	66362420	127669010	99.74%	1114108	1723546	0.19%	23.24%
RC0032	620	57.85%	142174783	245747950	99.57%	2377120	3291492	0.96%	18.12%
RC0033	581	55.15%	133351052	241796800	99.45%	2233957	3249163	1.25%	8.87%
RC0034	299.26	44.97%	68658770	152669650	99.50%	1138276	2026579	0.93%	20.36%
RC0035	290.43	41.44%	316893730	764794688	99.69%	4948601	9500468	0.96%	26.03%
RC0036	296	46.51%	323210081	694862980	99.69%	5393357	9418052	0.33%	9.28%
RC0037	297.43	50.00%	324534910	649076190	99.62%	5387611	8753208	0.96%	34.09%
RC0038	297.43	50.00%	324534910	649076190	99.62%	5387611	8753208	0.96%	34.09%
RC0039	271	45.77%	295603755	645870050	99.45%	4946207	8719409	0.99%	30.21%
RC0040	430	45.80%	469193161	1024462140	99.70%	7334864	12809895	0.95%	21.55%
RC0041	430	45.80%	469193161	1024462140	99.70%	7334864	12809895	0.95%	21.55%
RC0042	527	55.04%	120803007	219499070	99.70%	2021703	2972858	0.99%	13.35%
RC0043	426	52.75%	97803999	185398920	99.57%	1651379	2485450	1.03%	17.80%
RC0044	264	53.95%	60484436	112116830	99.58%	1018410	1505751	1.08%	18.63%
RC0045	311	45.62%	339201031	743475472	99.52%	5324156	9276602	0.93%	27.40%
RC0046	299	46.21%	326193360	705852432	99.51%	5106517	8795558	1.01%	31.83%
RC0047	300	56.94%	68805768	120834910	99.77%	1144585	1629301	0.25%	21.33%
RC0048	298	53.23%	68399666	128492212	99.76%	1076896	1596226	0.85%	13.95%
RC0049	428	54.01%	98210063	181835640	99.63%	1649493	2446227	1.08%	6.90%
RC0050	407	46.36%	443619134	956932036	99.48%	6949948	11897138	1.05%	28.22%
RC0051	373	45.97%	407298588	886104660	99.53%	6786877	11837069	0.99%	37.30%
RC0052	313.65	48.26%	342235294	709093350	99.54%	5672305	9534456	0.96%	30.75%
RC0053	214.02	46.64%	233527593	500672620	99.29%	3883384	6731283	1.15%	26.74%
RC0054	476	50.83%	109135561	214706612	99.63%	1722686	2677336	0.98%	17.89%
RC0055	296.67	52.71%	68062495	129135720	99.72%	1138192	1734973	0.98%	11.97%
RC0056	424	48.46%	462423406	954285290	99.33%	7732430	12824150	1.12%	31.16%
RC0057	283.48	45.47%	309311555	680326160	99.62%	4818411	8510008	0.96%	22.18%
RC0058	283.48	45.47%	309311555	680326160	99.62%	4818411	8510008	0.96%	22.18%
RC0059	296	61.50%	67876984	110367670	99.42%	1111719	1478820	1.14%	11.74%
RC0060	264	43.38%	288043612	664047644	99.69%	4524487	8296526	0.98%	31.30%
RC0061	225	43.69%	245240285	561305904	99.71%	3859100	6975281	0.96%	33.51%
RC0062	296	54.37%	68002043	125077330	99.62%	1143752	1683570	1.06%	18.94%
RC0063	297.96	47.52%	325107004	684086620	99.19%	5365941	9133550	1.14%	22.58%
RC0064	286	44.60%	312353964	700357556	99.52%	4889397	8698777	1.11%	33.16%
RC0065	344	48.12%	375796191	780928804	99.66%	5859805	9722762	0.99%	26.05%
RC0066	290	45.98%	316955667	689379964	99.58%	4953338	8629662	0.94%	25.66%
RC0067	233	35.16%	253838652	722013908	99.65%	3933917	8992360	0.91%	24.18%
RC0068	306	55.29%	70280965	127105440	99.61%	1099975	1573081	0.88%	14.95%
RC0069	504	52.13%	115711020	221949564	99.67%	1819262	2729055	0.94%	24.13%
RC0070	308	42.21%	336082258	796120500	99.35%	5659488	10737394	1.25%	23.10%
RC0071	296.41	55.02%	68004281	123602500	99.62%	1136782	1679244	1.03%	11.40%
RC0072	299.71	50.96%	327018023	641653950	99.54%	5353131	8534677	0.95%	21.18%
RC0073	270	52.33%	384767134	735295440	99.78%	6002519	9310271	0.82%	34.00%
RC0074	289	43.54%	315422013	724480792	99.66%	4955154	8987027	0.94%	41.03%
RC0075	298	45.88%	325480718	709452380	99.56%	5452057	9582103	0.93%	32.83%
RC0076	300.4	48.18%	327773524	680344704	99.64%	5097462	8482966	0.99%	28.06%
RC0077	297.34	45.46%	324437691	713602152	99.53%	5028816	8878993	1.07%	24.87%
RC0078	297.34	45.46%	324437691	713602152	99.53%	5028816	8878993	1.07%	24.87%
RC0079	297	58.10%	68236540	117441584	99.47%	1031474	1438950	1.00%	23.59%
RC0080	276	44.76%	300891861	672299460	99.68%	5069696	9048836	0.94%	33.60%
RC0081	275.91	53.86%	63301167	117518660	99.66%	1054692	1577548	1.02%	17.98%
RC0082	264	41.40%	288501689	696935400	99.64%	4853112	9392438	0.33%	25.72%
RC0083	296	46.77%	323375048	691390924	99.61%	5082215	8600112	0.93%	27.95%
RC0084	283	51.32%	65007314	126672630	99.58%	1094268	1682244	1.02%	19.51%
RC0085	281.7	45.13%	307375732	681030452	99.46%	4783715	8494745	1.16%	25.89%
RC0086	252	42.80%	274728379	641869830	99.57%	4588642	8592656	1.00%	27.27%
RC0087	298	51.23%	68457680	133625480	99.64%	1077836	1666745	0.91%	20.06%
RC0088	297.3	54.02%	68207527	126257052	99.66%	1064357	1572468	0.93%	18.51%
RC0089	191	46.92%	208347683	444093230	99.49%	3487927	5943901	1.00%	27.41%
RC0090	299	43.68%	325866505	746115650	99.57%	5458726	10062189	0.35%	32.63%
RC0091	298	38.61%	324638213	840905030	99.69%	5428301	11353022	0.30%	21.31%
RC0092	300	56.73%	68783891	121243010	99.11%	1143479	1627473	1.52%	12.97%
RC0093	297	46.50%	68264016	146800156	99.59%	1080869	1808160	0.95%	23.00%
RC0094	269	38.42%	61617638	160363560	99.68%	1037451	2162403	0.29%	16.75%
RC0095	224	44.49%	244806482	550291376	99.59%	3838566	6869039	1.02%	26.13%
RC0096	213	41.59%	232204320	558269020	99.77%	3662011	6965472	0.84%	27.37%
RC0097	298	53.55%	68433989	127803480	99.61%	1149194	1722416	1.01%	22.14%
RC0098	297	51.87%	68234468	131558204	99.76%	1072284	1631834	0.87%	14.56%
RC0099	296	46.99%	323264113	688008240	99.52%	5074448	8578868	1.06%	21.72%
RC0100	212	45.16%	230880871	511200690	99.66%	3857550	6889227	0.29%	28.20%
RC0101	279	46.46%	304646875	655683312	99.70%	4749915	8209294	0.96%	21.49%
RC0102	300	51.29%	326959396	637501528	99.69%	5081777	7841835	0.84%	50.29%
RC0103	296	44.37%	322894023	727673450	99.64%	5391791	9816511	0.34%	22.53%
RC0104	271	45.53%	296240781	650611908	99.53%	4652520	8091659	0.92%	27.44%
RC0105	271	45.53%	296240781	650611908	99.53%	4652520	8091659	0.92%	27.44%
RC0106	308	50.34%	70599561	140238420	99.64%	1189959	1890354	0.37%	18.53%
RC0107	268	36.27%	292684859	806915484	99.57%	4677759	10124320	0.97%	27.67%
RC0108	300	50.81%	68765655	135340590	99.61%	1155327	1808826	0.31%	13.49%
RC0109	270	46.35%	294988009	636385012	99.50%	4620662	7890441	1.06%	34.95%
RC0110	271	46.43%	295346145	636045270	99.64%	4941489	8560944	0.91%	22.38%
RC0111	265	47.58%	288862835	607154272	99.72%	4511201	7596599	0.87%	27.44%
RC0112	297	45.44%	324514123	714145880	99.48%	5425147	9569331	0.96%	29.00%
RC0113	298	43.71%	325363295	744452730	99.53%	5437057	9981800	0.94%	36.93%
RC0114	298	46.13%	325032581	704650590	99.45%	5441566	9531463	1.04%	24.69%
RC0115	303	43.90%	330662240	753180750	99.54%	5540184	10192972	0.47%	21.65%
RC0116	296	45.15%	323408069	716291108	99.36%	5093329	8887158	1.05%	32.60%
RC0117	298	44.88%	325396658	725098850	99.64%	5447392	9802371	0.35%	23.59%
RC0118	296	54.27%	68001611	125306824	99.62%	1071368	1556109	0.93%	12.65%
RC0119	295	42.57%	67720975	159078716	99.54%	1063060	1969987	0.96%	11.81%
RC0120	298	47.19%	68402949	144937100	99.58%	1158637	1954558	0.35%	10.22%
RC0121	297	51.52%	68167129	132300268	99.72%	1074304	1629127	0.89%	16.85%
RC0122	262	47.20%	286228273	606401568	99.80%	4462331	7574353	0.86%	28.79%
RC0123	273	46.52%	297594308	639685550	99.82%	4953647	8657282	0.35%	26.08%
RC0124	297	56.07%	68150505	121551512	99.73%	1068302	1507875	0.88%	20.96%
RC0125	287	48.62%	312880498	643524452	99.72%	4908342	8031895	0.85%	26.42%
RC0126	298	47.98%	324622286	676588150	99.54%	5419066	9142887	0.96%	31.93%
RC0127	281	55.70%	64512623	115818990	99.59%	1083119	1554759	0.96%	32.12%
RC0128	180	50.36%	256560036	509492480	99.55%	4267424	6953251	0.23%	38.49%
RC0129	294	45.91%	321093549	699327984	99.65%	5053128	8738076	0.92%	16.88%
RC0130	296	53.15%	68017528	127964316	99.66%	1072190	1580823	0.90%	14.52%
RC0131	313	47.85%	341010037	712693040	99.62%	5337446	8849008	0.88%	29.66%
RC0132	296	54.15%	67862916	125327020	99.56%	1136333	1671602	0.99%	22.04%
RC0133	299	46.98%	326529549	694978808	99.54%	5131952	8700194	1.04%	16.53%
RC0134	323	46.12%	352738089	764858072	99.65%	5521160	9533322	0.90%	27.53%
RC0135	309	52.07%	70955417	136269630	99.70%	1194693	1853301	0.36%	14.20%
RC0136	262	45.08%	286329715	635174560	99.59%	4497108	7914886	0.97%	25.39%
RC0137	298	51.45%	68481710	133094430	99.66%	1149732	1782116	0.32%	13.78%
RC0138	297	53.05%	68309152	128766648	99.60%	1073720	1593862	1.00%	15.53%
RC0139	297	50.02%	68107391	136170340	99.62%	1075887	1683592	0.99%	14.46%
RC0140	297	43.46%	68167067	156867040	99.61%	1095163	1960561	1.02%	10.64%
RC0141	267	43.20%	291844125	675529192	99.58%	4558254	8379562	0.89%	32.85%
RC0142	214	17.84%	49043283	274901200	99.57%	822692	3671675	0.40%	9.77%
RC0143	296	41.91%	323330416	771425156	97.29%	5117110	9606199	1.09%	29.52%
RC0144	322	47.15%	351568593	745582496	96.66%	5566054	9221429	2.21%	26.35%
RC0145	312	37.98%	340371785	896070980	98.86%	5819343	12092544	0.59%	29.00%
RC0146	294	53.81%	67426765	125301960	99.71%	1131133	1684912	0.27%	15.74%
RC0147	217	54.21%	309234259	570449180	99.84%	5121546	7840715	0.24%	26.26%
RC0148	299	52.08%	68692239	131903800	99.68%	1149455	1773827	0.29%	11.25%
RC0149	299	52.08%	68692239	131903800	99.68%	1149455	1773827	0.29%	11.25%
RC0150	329	46.97%	359270679	764909810	99.55%	5972476	10335566	0.34%	23.35%
RC0151	297	56.11%	68163102	121481744	99.76%	1064297	1518159	0.94%	19.04%
RC0152	266	54.40%	379128117	696926308	99.83%	5866372	8843759	0.85%	16.74%
RC0153	316	51.19%	345277213	674454628	99.71%	5376229	8243279	0.82%	54.12%
RC0154	432	53.61%	99098358	184836540	99.23%	1672396	2450524	1.38%	17.74%
RC0155	291.69	44.35%	318275032	717615220	99.50%	5291278	9618720	1.01%	28.83%
RC0156	300.33	45.32%	327698026	723110920	99.59%	5435333	9772038	0.95%	29.40%
RC0157	325.99	52.58%	74789128	142238250	99.66%	1248375	1921569	1.06%	15.12%
RC0158	296.51	36.98%	68026495	183942500	99.64%	1122242	2445693	0.94%	12.88%
RC0159	296.79	49.45%	323836482	654896408	99.40%	4985057	8122001	1.14%	17.58%
RC0160	294	44.94%	321292207	714964224	99.67%	5010892	8947300	0.94%	25.40%
RC0161	294	51.38%	67511800	131397980	99.47%	1128989	1751274	0.41%	20.10%
RC0162	274	49.38%	390346360	790501530	99.68%	6484933	10837491	0.28%	23.70%
RC0163	274	49.38%	390346360	790501530	99.68%	6484933	10837491	0.28%	23.70%
RC0164	297	52.24%	68065511	130305070	99.63%	1143201	1742116	0.30%	11.93%
RC0165	298	55.49%	68452978	123354840	99.66%	1080802	1535387	0.88%	21.05%
RC0166	297	44.16%	324393672	734608400	99.48%	5085630	9137415	1.04%	28.68%
RC0167	296	45.77%	322613135	704825596	99.64%	5024352	8773751	0.93%	29.99%
RC0168	291	42.59%	317462711	745330784	99.70%	4993253	9297958	0.92%	27.88%
RC0169	264	44.35%	288114504	649696716	99.54%	4507346	8115711	1.07%	21.50%
RC0170	278	41.92%	63764704	152120640	99.54%	1081401	2055685	0.40%	13.01%
RC0171	299	49.07%	68635554	139861204	99.82%	1078225	1747716	0.18%	23.95%
RC0172	298	43.57%	325622672	747375300	99.43%	5464767	9988900	1.11%	34.79%
RC0173	222	44.03%	242679403	551164110	99.60%	4038297	7474998	0.29%	19.19%
RC0174	218	34.29%	238165547	694627460	99.83%	3723620	8638550	0.96%	19.85%
RC0175	229	54.45%	52597831	96606370	99.49%	882351	1300909	1.07%	6.71%
RC0176	317.03	45.45%	345924912	761097136	99.41%	5402453	9454434	1.06%	31.47%
RC0177	335	48.29%	365555690	757043448	99.58%	5720490	9472044	1.01%	18.52%
RC0178	315	47.15%	343234675	727898360	99.60%	5719019	9840997	0.36%	22.78%
RC0179	354	45.80%	385747786	842245250	99.52%	6447613	11337877	1.00%	25.33%
RC0180	295	53.34%	67849638	127201830	99.74%	1139207	1718670	0.23%	18.04%
RC0181	391	54.76%	89775277	163953052	99.71%	1404063	2032810	0.93%	18.90%
RC0182	357	45.49%	389535808	856330152	99.50%	6108377	10668836	0.93%	30.33%
RC0183	504	47.43%	549630601	1158791060	99.55%	9154020	15547074	0.97%	30.38%
RC0184	424	47.65%	463023220	971818680	99.50%	7761707	13097915	1.00%	24.91%
RC0185	322	9.23%	73957625	801052312	99.41%	1171797	9975143	1.11%	25.45%
RC0186	299	50.32%	426392012	847297704	99.30%	6662559	10738947	0.89%	34.61%
RC0187	297	54.75%	68095364	124370732	99.76%	1072842	1541466	0.85%	11.70%
RC0188	297	55.17%	68194252	123616710	99.58%	1146754	1654760	1.00%	24.47%
RC0189	300	53.07%	68741249	129518550	99.52%	1155590	1731814	1.18%	18.89%
RC0190	241	46.80%	262637096	561174652	99.61%	4130558	7017710	1.00%	22.14%
RC0191	300	46.68%	68860301	147527172	99.63%	1092039	1815378	0.97%	9.91%
RC0192	270	42.75%	295111282	690349952	99.44%	4658387	8614938	1.07%	21.01%
RC0193	300	51.02%	427021917	836991800	99.65%	6577206	10449922	0.22%	28.64%
RC0194	442	45.08%	482276813	1069798648	99.58%	7543048	13295486	0.93%	30.85%
RC0195	414	55.52%	94991714	171107580	99.59%	1595289	2292706	1.01%	17.23%
RC0196	278	44.41%	303564699	683610900	99.46%	5073141	9176646	1.03%	31.52%
RC0197	281	46.62%	306128905	656641900	99.66%	4818815	8163251	1.02%	31.10%
RC0198	297	44.12%	324440632	735437484	99.80%	5100292	9192609	0.89%	27.12%
RC0199	269	47.57%	293722922	617498404	99.65%	4562449	7744625	0.84%	24.53%
RC0200	291	49.35%	66716224	135179520	99.71%	1120555	1809798	0.26%	13.97%
RC0201	294	45.94%	321279237	699273340	99.49%	5024023	8739144	1.03%	31.02%
RC0202	963	56.87%	220997168	388576580	99.61%	3688745	5231569	1.00%	25.21%
RC0203	299	43.71%	325980557	745805632	99.65%	5092359	9275704	0.89%	31.97%
RC0204	273.91	47.28%	298865743	632149988	99.74%	4646942	7902430	0.91%	24.18%
RC0205	476	47.83%	519549127	1086273624	99.50%	8098872	13577818	1.05%	23.67%
RC0206	299	51.19%	68540904	133904932	99.73%	1080644	1673257	0.89%	19.75%
RC0207	298	45.53%	325404488	714691950	99.59%	5439443	9659794	0.39%	22.71%
RC0208	283	45.62%	308995497	677365960	99.54%	4855408	8387483	0.92%	36.31%
RC0209	225	44.20%	245690880	555915150	99.68%	4136323	7520280	0.95%	31.00%
RC0210	297.58	47.25%	324693641	687205908	98.98%	4921545	8317572	0.92%	27.40%
RC0211	299	54.75%	68758788	125581400	99.69%	1149546	1703546	0.25%	21.57%
RC0212	298	44.50%	324652517	729507170	99.58%	5441318	9848097	1.05%	24.03%
RC0213	280	45.86%	305890556	666952230	99.42%	5116774	8996063	1.04%	23.16%
RC0214	300	50.98%	327064138	641520810	99.20%	5223265	8274822	0.91%	34.71%
RC0215	412	45.18%	449126973	994049140	99.61%	7535846	13429627	1.00%	21.63%
RC0216	266.82	46.98%	291132788	619736810	99.31%	4805521	8297458	1.10%	14.79%
RC0217	283	47.96%	308828854	643990408	99.67%	4826009	8010224	0.84%	31.84%
RC0218	298.88	51.80%	326120767	629539330	99.40%	5218826	8200617	0.95%	34.09%
RC0219	327	57.88%	74928509	129462124	99.53%	1177081	1629702	0.91%	35.60%
RC0220	299	46.08%	326025382	707465430	99.64%	5429940	9479499	0.27%	33.31%
RC0221	398	53.47%	91215786	170580410	99.67%	1532417	2271753	0.94%	17.44%
RC0222	292	50.12%	318818202	636139380	99.70%	4946777	7813851	0.84%	51.32%
RC0223	258	46.72%	281614042	602748930	99.75%	4696144	8106949	0.94%	29.60%
RC0224	299.48	47.10%	326771115	693821100	99.29%	5380690	9237619	1.19%	19.16%
RC0225	289	48.53%	315617318	650358904	99.65%	4881552	8097970	0.89%	22.01%
RC0226	290	40.87%	316416711	774131750	99.54%	5329584	10443955	0.97%	36.30%
RC0227	279.98	47.72%	305494695	640179680	99.44%	5082723	8613461	1.14%	26.04%
RC0228	295.87	49.77%	322831881	648605280	99.42%	4864053	7996588	0.95%	27.24%
RC0229	278.41	45.52%	303776689	667316510	99.38%	5053064	9014283	1.19%	22.20%
RC0230	221	44.14%	241171459	546339290	99.53%	4029421	7388421	1.04%	16.92%
RC0231	265	47.03%	289449948	615459932	99.43%	4535770	7706358	1.03%	24.73%
RC0232	299	49.64%	326415230	657584060	99.45%	5272460	8644687	0.97%	37.21%
RC0233	269.04	46.28%	293555064	634312560	99.53%	4879905	8507000	1.00%	32.47%
RC0234	274	48.91%	299351442	612039932	99.58%	4674466	7647730	0.91%	23.50%
RC0235	233.54	44.12%	254822750	577566780	99.47%	4231426	7754940	1.01%	28.77%
RC0236	292	46.38%	318334034	686367220	99.35%	5329639	9237141	1.01%	29.63%
RC0237	297	46.97%	324608986	691041820	99.53%	5444780	9281265	0.95%	32.30%
RC0238	299	46.15%	326012940	706492276	99.53%	5128308	8789653	0.97%	29.89%
RC0239	272	46.17%	296934269	643102196	99.54%	4664680	8022592	0.97%	29.23%
RC0240	269	45.90%	292977835	638262310	99.56%	4900045	8581721	0.94%	27.93%
RC0241	299	49.94%	325715693	652167810	99.41%	5417849	8774533	0.99%	31.22%
RC0242	298	57.66%	618628504	1072866160	98.52%	9903790	13846467	1.00%	12.60%
RC0243	295	52.37%	67793566	129459470	99.57%	1139782	1742241	1.04%	19.09%
RC0244	575	55.66%	131880329	236943604	99.68%	2069232	2951091	0.96%	23.82%
RC0245	298.2	64.00%	68414923	106891190	99.45%	1100638	1427843	0.95%	18.11%
RC0246	318.99	48.89%	348063187	711991210	99.55%	5770116	9536386	0.95%	31.37%
RC0247	299.69	48.14%	326999793	679291480	99.20%	5332828	8940033	0.99%	27.00%
RC0248	276	47.56%	301317600	633547856	99.67%	4718195	7911766	0.90%	23.80%
RC0249	297	44.33%	324447361	731910020	99.52%	5095569	9134496	0.93%	19.90%
RC0250	296	48.75%	68051280	139578180	99.65%	1079097	1712440	0.99%	13.41%
RC0251	264.13	46.45%	288203276	620519100	99.71%	4489863	7731513	0.93%	29.14%
RC0252	296.35	45.52%	323354075	710311910	99.32%	5377058	9556233	1.14%	16.01%
RC0253	302	48.01%	329000535	685307732	99.63%	5135428	8490462	0.91%	31.01%
RC0254	301.13	40.72%	328574236	806848300	99.58%	5140938	10068419	1.08%	30.63%
RC0255	276.55	47.31%	301750344	637858044	99.48%	4678726	7910684	0.97%	22.90%
RC0256	276	46.38%	300614225	648209170	99.61%	5021510	8709332	0.96%	29.91%
RC0257	298	44.26%	325149303	734562496	99.54%	5112977	9152719	0.99%	28.53%
RC0258	264	45.29%	287668134	635144230	99.69%	4801647	8588433	0.28%	22.37%
RC0259	318	44.16%	346979014	785794730	99.71%	5778441	10659232	0.28%	15.44%
RC0260	296.63	45.94%	323665142	704530944	99.48%	5002466	8717788	1.05%	25.48%
RC0261	274	47.23%	299428400	633931580	99.53%	4652620	7897482	0.90%	20.51%
RC0262	287	46.04%	313674857	681366980	99.54%	4934966	8499632	1.13%	18.91%
RC0263	298	47.03%	325398955	691942020	99.47%	5445502	9330446	1.00%	29.54%
RC0264	298	46.52%	324703761	698034844	99.45%	5102401	8674801	1.05%	29.13%
RC0265	298	54.99%	68385128	124366270	99.61%	1146140	1675446	1.02%	17.89%
RC0266	276.46	49.17%	301653036	613465300	99.65%	5009148	8275227	0.98%	32.27%
RC0267	297	50.94%	423421932	831245972	99.54%	6596993	10525172	1.07%	23.79%
RC0268	285	43.81%	310630208	709099912	99.66%	4869212	8831464	0.92%	30.32%
RC0269	296.37	48.90%	323374267	661248980	99.40%	5276283	8754828	0.95%	20.75%
RC0270	297.5	44.56%	324608509	728507348	98.62%	4853348	8682754	0.94%	30.36%
RC0271	298	51.13%	68433855	133855228	99.86%	1078487	1648816	0.91%	24.07%
RC0272	303	45.05%	330703860	734045900	99.50%	5546344	9897388	1.00%	30.76%
RC0273	296.69	58.93%	68068434	115500140	99.63%	1121639	1543116	0.94%	13.88%
RC0274	285	46.07%	310804879	674650830	99.46%	5214756	9098802	1.09%	22.75%
RC0275	259	54.54%	368802167	676209170	99.66%	6087271	9231787	0.27%	35.55%
RC0276	294.81	42.29%	321676254	760634420	99.45%	5356714	10221796	1.13%	35.71%
RC0277	297	45.62%	323972616	710209740	99.57%	5095790	8833925	1.01%	30.48%
RC0278	296	46.21%	322449473	697718980	99.47%	5408306	9402145	1.05%	24.70%
RC0279	296	46.92%	323464767	689412150	99.54%	5398546	9326567	1.05%	21.06%
RC0280	299	53.79%	68568116	127472940	99.59%	1151724	1718798	1.03%	11.48%
RC0281	297	43.46%	323740771	744846900	99.49%	5448612	10041031	1.10%	43.75%
RC0282	282	47.12%	308208486	654054310	99.50%	5154745	8848083	1.17%	20.66%
RC0283	296	46.02%	322474619	700797140	99.64%	5061428	8748861	0.90%	17.74%
RC0284	273	50.90%	389231234	764626730	99.62%	6461027	10416743	0.28%	37.33%
RC0285	307	49.68%	70386353	141670688	99.74%	1111138	1752706	0.93%	14.43%
RC0286	293	43.20%	319215503	738895028	99.62%	4984619	9132788	0.89%	34.02%
RC0287	158	46.51%	172603560	371085050	99.85%	2892951	4989419	0.91%	34.09%
RC0288	310	41.15%	338753108	823182752	99.66%	5333751	10282610	0.92%	21.78%
RC0289	298	54.31%	68464957	126072380	99.66%	1147253	1699556	0.36%	9.03%
RC0290	248	44.61%	270379400	606097492	99.80%	4228553	7568687	0.95%	26.26%
RC0291	317	32.78%	346137128	1055857208	99.61%	5432915	13118603	0.98%	21.48%
RC0292	265	43.86%	288971049	658784210	99.62%	4841269	8869257	0.96%	24.87%
RC0293	252	44.64%	275488403	617107260	99.59%	4610412	8342080	0.95%	23.13%
RC0294	274	48.18%	298563952	619629444	99.58%	4693163	7715199	1.02%	31.22%
RC0295	296	52.47%	67978489	129554950	99.62%	1146195	1743310	1.04%	13.37%
RC0296	276	45.27%	300793425	664468304	99.64%	4714075	8297807	0.94%	23.93%
RC0297	325	49.32%	74577021	151199930	99.71%	1254961	2037377	0.28%	9.58%
RC0298	297	42.70%	323928355	758651250	99.59%	5422993	10161475	0.92%	43.64%
RC0299	298	43.73%	325001262	743222410	99.56%	5400424	9967309	0.41%	36.59%
RC0300	215	44.23%	234715809	530694850	99.61%	3934961	7165089	0.32%	21.26%
RC0301	319	46.41%	348462057	750824900	99.58%	5824540	10134768	0.96%	24.42%
RC0302	317	42.59%	345455838	811210610	99.57%	5774334	10922524	0.37%	30.06%
RC0303	329	47.05%	359296905	763655900	99.60%	6010573	10307614	0.32%	20.22%
RC0304	299	43.05%	326571926	758596090	99.65%	5405152	10220693	0.32%	23.15%
RC0305	297	55.73%	68189998	122348676	99.70%	1065968	1520291	0.88%	15.62%
RC0306	329	44.13%	358852530	813153950	99.69%	5984511	11015230	0.29%	14.61%
RC0307	208	47.52%	227375185	478460660	99.69%	3571670	5936601	1.00%	31.14%
RC0308	277	45.19%	302770016	669926320	99.66%	4730689	8330158	0.90%	27.05%
RC0309	323	35.99%	352554715	979689060	99.57%	5973022	13238178	0.39%	24.20%
RC0310	329	43.81%	359475646	820533980	99.50%	6069042	11084695	0.48%	18.76%
RC0311	306	46.55%	334175542	717816124	99.56%	5258463	8962064	1.04%	22.54%
RC0312	300	46.88%	326907928	697255790	99.32%	5457672	9328229	1.30%	34.85%
RC0313	298	48.45%	325535131	671936140	99.61%	5080194	8402123	0.90%	22.03%
RC0314	248	54.90%	56941617	103711160	99.73%	949294	1390441	0.24%	11.59%
RC0315	283	52.11%	64902611	124548268	99.67%	1021057	1546319	0.89%	16.87%
RC0316	299	54.53%	68728057	126043036	99.62%	1083993	1571486	0.96%	23.45%
RC0317	267	43.63%	290865324	666724820	99.62%	4565297	8316898	0.89%	27.55%
RC0318	299	56.64%	68706509	121293900	99.61%	1150581	1648913	0.99%	7.08%
RC0319	297	52.42%	68180416	130061330	99.67%	1143074	1745971	0.30%	13.89%
RC0320	297	46.58%	323876017	695271104	99.69%	5057085	8672360	0.91%	25.63%
RC0321	208	47.68%	227440611	476993328	99.69%	3543310	5963716	0.92%	29.41%
RC0322	323	46.58%	352438847	756633360	99.64%	5866298	10195798	0.30%	27.36%
RC0323	299	42.94%	326570653	760463524	99.61%	5159890	9474111	0.97%	25.41%
RC0324	236	26.84%	257456327	959373840	99.60%	4050054	11948694	0.92%	12.35%
RC0325	272	41.90%	296449458	707457660	99.11%	4991568	9599505	0.43%	28.88%
RC0326	294	43.00%	320927069	746408110	98.44%	5404488	10099323	0.42%	29.47%
RC0327	298	48.48%	324840261	670066110	99.48%	5429461	9043762	0.99%	19.59%
RC0328	276	45.10%	301275529	668082100	99.63%	5028307	8977358	0.32%	34.10%
RC0329	297	47.03%	324198765	689324636	99.63%	5081724	8588762	0.91%	19.82%
RC0330	297	10.08%	68036647	674721950	99.60%	1150342	9135327	0.31%	22.69%
RC0331	308	46.89%	335900054	716375468	99.49%	5258477	8900483	1.03%	20.87%
RC0332	296	45.47%	323043712	710453624	99.57%	5076174	8872171	1.01%	20.48%
RC0333	298	46.88%	325235095	693774132	99.64%	5097779	8659025	0.91%	27.55%
RC0334	293	47.66%	319821793	671074452	99.68%	4994834	8353494	0.88%	35.54%
RC0335	304	42.90%	331281608	772171476	99.63%	5189613	9557596	0.87%	32.89%
RC0336	300	44.55%	327364680	734775904	99.60%	5127271	9151376	0.94%	33.15%
RC0337	300	54.24%	68715528	126684740	99.49%	1158592	1711876	1.00%	29.61%
RC0338	281	45.02%	306355622	680503088	99.66%	4801796	8510494	0.99%	21.88%
RC0339	298	49.31%	68322482	138547164	99.69%	1077140	1714027	0.88%	16.43%
RC0340	297	44.16%	324518228	734884710	99.72%	5439490	9903692	0.40%	31.33%
RC0341	298	54.21%	68260480	125921110	99.61%	1150411	1718265	0.31%	34.41%
RC0342	214	47.88%	233065363	486766776	99.70%	3643142	5989436	0.85%	49.45%
RC0343	297	45.92%	323657378	704786390	99.41%	5420006	9463648	1.03%	30.07%
RC0344	281	46.11%	306995540	665852670	99.67%	5122704	8990066	0.32%	22.17%
RC0345	299	42.80%	325932617	761463836	99.65%	5140343	9523944	0.95%	22.18%
RC0346	222	33.48%	241692203	721805280	99.22%	4119688	9750730	0.81%	18.98%
RC0347	222	51.57%	317175140	615051360	99.83%	5261753	8425703	0.24%	35.34%
RC0348	296	46.55%	323315391	694629040	99.55%	5427649	9352367	0.38%	26.46%
RC0349	299	58.23%	68630323	117856270	99.73%	1144825	1594400	0.25%	21.76%
RC0350	284	54.25%	404701637	746042640	99.64%	6711375	10216918	0.28%	32.18%
RC0351	298	44.17%	324994158	735837396	99.59%	5106436	9207953	1.17%	16.44%
RC0352	298	49.23%	68256699	138650068	99.62%	1069765	1723657	0.91%	14.37%
RC0353	298	44.03%	325674411	739702072	99.50%	5121533	9228871	1.02%	25.78%
RC0354	226	45.93%	246195067	535988600	99.60%	4089967	7238831	0.33%	26.36%
RC0355	296	41.97%	323028746	769742330	99.63%	5404187	10383227	0.31%	25.71%
RC0356	299	43.89%	326624607	744146020	99.61%	5120817	9280450	0.91%	25.56%
RC0357	269	47.90%	293781010	613355568	99.60%	4592714	7648551	0.92%	20.02%
RC0358	323	46.45%	352308741	758417590	99.58%	5858358	10247313	0.39%	21.32%
RC0359	299	47.85%	326489975	682372180	99.69%	5442982	9147144	0.31%	33.68%
RC0360	306	45.77%	333963605	729656316	99.48%	5230715	9083807	0.97%	29.32%
RC0361	296	37.39%	322753404	863206190	99.53%	5476128	11655615	0.39%	26.96%
RC0362	295	51.02%	67773121	132826416	99.70%	1061013	1638349	0.96%	12.24%
RC0363	281	44.99%	306212316	680603700	99.58%	5125281	9227292	0.40%	21.92%
RC0364	296	46.35%	323016297	696973276	99.53%	5072378	8683352	1.13%	26.38%
RC0365	298	52.67%	68416457	129898820	99.27%	1075583	1629889	0.93%	14.29%
RC0366	296	42.06%	323057618	768081232	99.70%	5055851	9499957	0.95%	33.30%
RC0367	299	46.03%	326210298	708616780	99.64%	5115616	8862896	0.89%	21.93%
RC0368	269	46.37%	382971476	825941900	99.57%	6392616	11321506	0.30%	31.86%
RC0369	286	45.90%	312159673	680050070	99.69%	5207411	9213397	0.34%	27.90%
RC0370	278	48.57%	396442586	816291070	99.69%	6601818	11178974	0.29%	21.45%
RC0371	298	42.26%	324691791	768231180	99.69%	5098938	9557389	0.89%	28.01%
RC0372	299	45.40%	68514648	150898760	99.46%	1085003	1861694	0.99%	21.94%
RC0373	267	50.38%	380703350	755730850	99.81%	6322816	10353002	0.23%	32.05%
RC0374	298	54.35%	68431939	125912640	99.72%	1150974	1699584	0.28%	19.11%
RC0375	297	49.53%	68274422	137851536	99.63%	1081463	1719289	0.99%	12.58%
RC0376	299	43.03%	326559345	758965488	99.50%	5139163	9428647	1.04%	21.46%
RC0377	286	45.08%	311747296	691508860	99.66%	5186567	9302157	0.35%	30.30%
RC0378	299	41.64%	325885845	782637588	99.60%	5134634	9763524	1.01%	23.92%
RC0379	328	41.09%	357395736	869702540	99.47%	6006843	11717850	0.59%	23.41%
RC0380	164	37.33%	179368671	480493052	99.37%	2844106	5987561	1.34%	29.82%
RC0381	296	45.77%	323341653	706468260	99.66%	5084065	8827279	0.93%	22.75%
RC0382	322	53.87%	73893140	137170880	99.63%	1240799	1860734	0.34%	21.28%
RC0383	295	43.11%	322317432	747723720	99.61%	5080535	9366081	0.99%	20.09%
RC0384	296	43.21%	323502529	748704956	99.63%	5062174	9301736	0.95%	26.16%
RC0386	313	49.88%	446630404	895364056	99.49%	6984260	11298786	1.01%	36.47%
RC0387	317	47.93%	451284637	941476752	99.65%	7008650	11895590	0.90%	19.30%
RC0388	246	53.49%	350133409	654636920	99.76%	5811981	8994793	0.19%	29.79%
RC0389	300	50.23%	68854861	137081070	99.68%	1156658	1830446	0.49%	24.70%
RC0390	274	56.59%	62925812	111198780	99.70%	1049274	1504509	0.31%	8.61%
RC0391	279	40.35%	304829335	755487044	99.58%	4816993	9459913	0.94%	21.11%
RC0392	276	43.51%	301417730	692738936	99.53%	4746409	8692663	1.02%	17.59%
RC0393	305	44.00%	333100015	757103970	99.61%	5588584	10208484	0.33%	30.97%
RC0394	299	46.46%	326039410	701743720	99.57%	5122065	8769028	0.93%	22.92%
RC0395	295	47.42%	67622320	142598496	99.71%	1073245	1770602	0.94%	23.94%
RC0396	298	53.35%	68351645	128108032	99.65%	1083921	1597672	0.93%	15.65%
RC0397	214	46.46%	305336871	657149732	99.70%	4742420	8353709	0.22%	29.56%
RC0398	297	47.20%	323761303	685959128	99.48%	5075358	8562855	0.95%	23.12%
RC0399	299	43.31%	326643112	754192232	99.57%	5157475	9371314	0.94%	31.03%
RC0400	296	51.99%	68016427	130825108	99.64%	1077383	1630774	0.97%	9.57%
RC0401	315	51.60%	448581244	869269940	99.64%	7448192	11894774	0.30%	21.37%
RC0402	275	50.53%	392610171	776995940	99.46%	6513665	10662460	0.55%	20.83%
RC0403	269	48.57%	383484290	789501510	99.52%	6383418	10807311	0.43%	28.62%
RC0404	270	52.48%	384359621	732453470	99.55%	6372185	9942933	0.38%	40.54%
RC0405	298	47.84%	325151862	679668990	99.64%	5450730	9180229	0.28%	25.35%
RC0406	299	44.45%	326732896	735017888	99.58%	5147674	9166289	0.96%	25.33%
RC0407	230	42.04%	250602142	596058330	99.69%	4220467	8055943	0.39%	29.07%
RC0408	296	43.49%	322922519	742457240	99.67%	5366999	10016974	0.36%	25.70%
RC0409	326	41.79%	355193565	849863844	99.61%	5586258	10605317	0.97%	24.99%
RC0410	268	46.22%	292104923	631983170	99.54%	4882386	8521969	0.48%	24.78%
RC0411	271	48.43%	387008209	799082924	99.65%	6035340	10134959	0.90%	19.16%
RC0412	318	52.28%	453832518	868001396	99.82%	7027182	10970075	0.84%	32.62%
RC0413	272	52.91%	388206222	733738808	99.59%	6047381	9299340	0.96%	29.49%
RC0414	298	7.06%	68389775	968090550	98.35%	1149936	13106476	0.42%	15.31%
RC0415	199	42.84%	217321476	507320292	99.80%	3419289	6335286	0.83%	27.47%
RC0416	300	56.75%	68804110	121235504	99.62%	1081516	1522014	1.02%	16.72%
RC0417	299	49.74%	68747862	138211500	99.71%	1158928	1862158	0.30%	11.93%
RC0418	285	41.85%	310971447	743088430	99.68%	5220601	10038158	0.30%	25.82%
RC0419	298	53.55%	68358181	127643140	99.70%	1074656	1588845	0.90%	18.88%
RC0420	297	50.78%	423574306	834214912	99.56%	6579137	10525795	0.99%	33.60%
RC0421	313	50.27%	446641374	888455504	99.76%	6960725	11230539	0.87%	34.38%
RC0422	296	48.45%	67945838	140252756	99.69%	1079775	1745858	0.91%	12.25%
RC0423	299	46.72%	326022552	697888696	99.59%	5121859	8713805	0.94%	22.23%
RC0424	328	45.98%	358082347	778813496	96.66%	5672820	9646116	2.21%	25.76%
RC0425	296	53.24%	67923313	127584696	99.63%	1075362	1588573	0.93%	18.89%
RC0426	295	52.27%	419961470	803494040	99.60%	6541320	10165844	0.96%	20.35%
RC0427	262	53.24%	373298262	701212610	99.73%	6179985	9621215	0.20%	25.43%
RC0428	299	52.68%	426444284	809436176	99.60%	6620866	10246050	0.94%	16.78%
RC0429	299	52.44%	68678191	130952864	99.63%	1082944	1637986	0.97%	18.14%
RC0430	291	50.15%	415202937	827988840	99.58%	6879683	11335012	0.35%	25.27%
RC0431	224	51.12%	318724502	623490630	99.35%	5269043	8522458	0.27%	38.31%
RC0432	296	51.50%	422418962	820160688	99.58%	6582333	10382002	0.96%	27.75%
RC0433	225	49.85%	321336797	644660590	99.65%	5335415	8808352	0.34%	28.80%
RC0434	297	42.60%	324175718	761015290	99.65%	5444499	10290369	0.36%	17.91%
RC0435	286	51.89%	407577517	785433390	99.62%	6747126	10659826	0.33%	38.35%
RC0436	267	49.78%	380812671	765005360	99.75%	6337049	10512084	0.24%	25.94%
RC0437	296	54.71%	422111583	771498490	99.70%	6990550	10583138	0.29%	27.70%
RC0438	278	51.30%	396518541	772991030	99.34%	6577650	10583262	0.32%	29.42%
RC0439	291	49.62%	415406964	837158468	99.44%	6479870	10531780	1.04%	38.93%
RC0440	299	52.70%	68736235	130436880	99.62%	1153529	1751479	0.28%	8.90%
RC0441	297	51.15%	423983637	828970730	99.62%	7034801	11367297	0.30%	17.33%
RC0442	242	48.57%	345414863	711224850	99.71%	5725666	9480007	0.39%	23.18%
RC0443	244	44.93%	347208044	772828210	99.70%	5762638	10569158	0.26%	30.11%
RC0444	294	53.58%	67551028	126080580	99.72%	1064815	1575934	0.87%	21.40%
RC0445	295	53.44%	67693977	126672392	99.65%	1068870	1577699	0.96%	13.91%
RC0446	297	54.97%	68244779	124156260	99.70%	1075683	1550766	0.89%	19.00%
RC0447	297	53.49%	423088293	790906410	99.50%	7050902	10873454	0.46%	27.40%
RC0448	274	48.48%	390137440	804764076	99.52%	6110354	10193972	0.97%	27.80%
RC0449	262	50.08%	372863438	744482340	99.65%	6198987	10201942	0.27%	24.73%
RC0450	290	49.91%	412983048	827374520	99.72%	6864933	11366700	0.29%	26.89%
RC0451	234	49.86%	333592396	669021920	99.55%	5202225	8451013	1.09%	32.91%
RC0452	323	48.70%	460052096	944726860	99.63%	7655053	12927541	0.26%	26.85%
RC0453	273	52.71%	389221626	738398920	99.64%	6458812	10157060	0.27%	25.14%
RC0454	315	54.39%	448969916	825447910	99.15%	7463010	11336704	0.31%	28.27%
RC0455	296	50.51%	67937917	134495340	99.71%	1145671	1820876	0.29%	20.29%
RC0456	298	59.53%	68323705	114765210	99.67%	1145534	1568069	0.54%	8.47%
RC0457	297	53.97%	68287883	126537568	99.71%	1074184	1591078	0.87%	16.25%
RC0458	245	46.80%	349742847	747347370	99.60%	5853125	10245602	0.29%	28.31%
RC0459	296	53.73%	68057987	126668288	99.61%	1073748	1581091	0.94%	17.01%
RC0460	280	53.35%	398486062	746869252	99.63%	6182533	9418813	0.92%	33.71%
RC0461	299	53.35%	68736792	128847132	99.60%	1082513	1581388	1.06%	18.85%
RC0462	298	52.68%	424465785	805753976	98.99%	6635858	10221773	0.94%	28.97%
RC0463	298	51.82%	68413054	132018320	99.63%	1148313	1780148	0.29%	12.63%
RC0464	297	50.38%	423530098	840604460	99.54%	6610177	10655870	1.08%	23.74%
RC0465	298	51.03%	425300874	833392592	99.67%	6605879	10538610	0.95%	25.58%
RC0466	211	51.31%	300461664	585578840	99.74%	4981000	7890500	0.26%	45.52%
RC0467	299	54.28%	426103410	784993860	99.65%	7058324	10737400	0.28%	32.18%
RC0468	326	51.48%	464143106	901609240	99.63%	7665374	12317828	0.23%	33.92%
RC0469	298	53.03%	68467587	129103784	99.58%	1077933	1610020	1.01%	16.29%
RC0470	265	49.34%	378252229	766557204	99.57%	5875313	9661831	0.93%	34.44%
RC0471	299	52.99%	426534612	804914404	99.61%	6636533	10217012	1.05%	17.61%
RC0472	289	50.41%	412122477	817588310	99.62%	6856374	11196056	0.42%	24.95%
RC0473	270	51.09%	384964690	753496660	99.53%	6411839	10348618	0.41%	25.87%
RC0474	298	53.86%	424303893	787731980	99.67%	7039363	10820610	0.23%	35.17%
RC0475	218	49.92%	310448946	621871110	99.47%	5162293	8519682	0.52%	22.94%
RC0476	297	55.65%	68190430	122541108	99.60%	1073837	1529915	1.01%	16.57%
RC0477	296	52.82%	422134803	799160596	99.66%	6561324	10145705	0.88%	16.14%
RC0478	224	52.35%	319035085	609381920	99.83%	5297807	8349774	0.23%	26.74%
RC0479	339	55.64%	482613159	867388102	99.71%	6186418	8949317	0.25%	18.88%
RC0480	394	50.92%	561406729	1102425068	99.65%	8704508	13958082	0.99%	16.65%
RC0481	302	45.62%	329560728	722418130	99.67%	5507741	9762862	0.30%	27.84%
RC0482	277	47.49%	302718103	637424692	99.51%	4742190	7899032	0.98%	32.30%
RC0483	295	51.77%	322268327	622467510	99.68%	5319877	8413397	0.30%	29.25%
RC0484	209	43.20%	227974645	527765350	99.50%	3823116	7116142	0.41%	20.89%
RC0485	295	46.73%	322204463	689540780	99.56%	5024053	8598133	1.08%	28.64%
RC0486	307	47.10%	334958654	711154850	99.70%	5568040	9629789	0.27%	27.60%
RC0487	297	45.37%	324098055	714312068	99.55%	5056876	8886526	0.95%	24.71%
RC0488	235	42.04%	256240389	609457030	99.84%	4295134	8233561	0.24%	25.96%
RC0489	299	44.08%	326219512	740124024	98.73%	5117222	9226912	0.88%	29.15%
RC0490	296	41.66%	322539199	774264120	99.63%	5413684	10439119	0.29%	25.13%
RC0491	298	47.06%	324635580	689795988	99.59%	5114709	8613559	1.02%	20.76%
RC0492	297	53.33%	423086375	793362708	99.58%	6571386	10008047	0.92%	29.22%
RC0493	276	48.23%	393350730	815613050	99.63%	6546977	11156589	0.28%	29.16%
RC0494	299	50.69%	426310230	841089720	99.67%	6673534	10686742	0.90%	27.30%
RC0495	297	52.40%	424012883	809146844	99.69%	6607073	10274531	1.04%	24.73%
RC0496	294	49.03%	419545932	855733856	99.72%	6480550	10814721	0.17%	37.52%
RC0497	201	48.27%	287238590	595099190	99.84%	4768427	8132422	0.14%	45.11%
RC0498	256	48.21%	365293896	757791972	99.82%	5653798	9577401	0.15%	43.77%
RC0499	298	51.53%	424241994	823288164	99.71%	6575467	10426381	0.17%	34.95%
RC0500	299	52.00%	426652387	820420510	99.23%	7081927	11110925	0.43%	25.82%
RC0501	295	53.74%	67848578	126252112	99.71%	1066613	1559892	0.91%	13.03%
RC0502	298	53.73%	68362340	127228920	99.68%	1142500	1715218	0.30%	20.39%
RC0503	288	53.30%	410174025	769550250	99.80%	6778480	10542371	0.23%	39.38%
RC0504	463	50.86%	659811097	1297187800	99.73%	6297100	12612812	0.39%	13.25%
RC0505	277	51.52%	395559344	767787650	99.74%	6564530	10330282	0.18%	35.71%
RC0506	291	55.28%	66796408	120822240	99.67%	1123658	1639328	0.38%	17.22%
RC0507	299	54.49%	426027560	781820588	99.69%	6621034	9905674	0.93%	23.75%
RC0508	321	50.13%	456932178	911525000	99.28%	7138568	11488474	0.90%	26.65%
RC0509	292	50.68%	67124625	132438320	99.71%	1130665	1786332	0.25%	17.83%
RC0510	301	51.87%	428894321	826909412	99.73%	6683664	10416688	0.82%	41.44%
RC0511	180	48.25%	256865463	532391650	99.67%	4272881	7255577	0.20%	42.78%
RC0512	318	50.24%	452652846	900960340	99.53%	7522983	12218709	0.36%	23.61%
RC0513	265	50.82%	377985551	743810830	99.55%	6269688	10183230	0.32%	32.21%
RC0514	274	51.60%	391175973	758089080	99.75%	6480917	10379763	0.25%	25.33%
RC0515	317	48.19%	452232381	938365540	99.53%	7519104	12550705	0.30%	35.55%
RC0516	278	49.88%	396505255	794874010	99.82%	6579948	10649690	0.14%	35.57%
RC0517	298	55.06%	424679402	771293600	99.73%	6548543	9775814	0.19%	34.64%
RC0518	257	48.41%	366264818	756618590	99.46%	6101288	10292666	0.52%	33.49%
RC0519	299	48.07%	425868275	885879750	99.57%	7112644	12164881	0.33%	28.23%
RC0520	328	47.51%	467883392	984748590	99.68%	7797268	13542803	0.32%	9.49%
RC0521	320	51.08%	456274149	893259920	99.74%	7562329	12198630	0.20%	33.22%
RC0522	306	51.23%	436744340	852463880	99.67%	6747787	10692816	0.26%	26.84%
RC0523	273	49.06%	388479976	791847490	99.67%	6441296	10606127	0.42%	22.87%
RC0524	324	53.18%	462179341	869152644	99.79%	7137674	10905810	0.18%	32.13%
RC0525	231	50.44%	329364132	652969870	99.65%	5483629	8898949	0.25%	37.97%
RC0526	297	54.55%	423224054	775783756	98.22%	6602041	9840233	0.97%	34.11%
RC0527	281	49.71%	399964896	804662250	99.57%	6633636	11019691	0.35%	23.85%
RC0528	299	56.53%	426820228	755012424	99.76%	6585207	9584723	0.19%	34.56%
RC0529	296	54.23%	422468410	779002280	99.63%	6582948	9871713	0.85%	35.38%
RC0530	282	51.20%	402106628	785362416	99.58%	6269629	9944047	1.08%	23.75%
RC0531	297	50.57%	423118607	836765776	99.61%	6588799	10568267	0.88%	27.30%
RC0532	296	53.24%	422331839	793208360	99.63%	7003116	10882348	0.28%	25.44%
RC0533	226	52.91%	322594574	609648410	99.74%	5353364	8371001	0.21%	29.84%
RC0534	265	53.41%	378150411	708003840	99.49%	5873431	8960051	0.83%	35.10%
RC0535	284	51.39%	404760678	787589320	99.71%	6726868	10790989	0.27%	28.19%
RC0536	297	49.85%	423508583	849587280	99.67%	6623882	10774618	0.91%	25.63%
RC0537	266	54.17%	61036562	112680050	99.80%	1023172	1528943	0.30%	13.91%
RC0538	307	51.83%	437298955	843667230	99.71%	7255965	11441157	0.33%	31.47%
RC0539	319	51.67%	454221914	879157650	99.77%	7515120	11976412	0.22%	25.88%
RC0540	210	48.82%	299427777	613343332	99.60%	4617439	7706035	0.20%	29.55%
RC0541	300	54.45%	427001288	784176892	99.80%	6629904	9916658	0.83%	31.39%
RC0542	473	59.11%	737006438	1246770504	99.78%	7531961	13012249	0.49%	5.47%
RC0543	542	51.31%	772611683	1505838400	99.75%	9517487	14640700	0.40%	15.57%
RC0544	298	43.04%	68443759	159039500	99.85%	870319	1507779	0.36%	12.85%
RC0545	298	52.61%	424999493	807845118	99.81%	5490288	8351264	0.19%	23.28%
RC0546	306	53.34%	436794665	818882540	99.71%	7243779	11194450	0.20%	31.40%
RC0547	296	32.58%	422040410	1295239120	99.52%	6530779	16083517	0.16%	29.94%
RC0548	261	49.97%	372672537	745801680	99.73%	5783955	9483980	0.21%	28.68%
RC0549	280	52.11%	399236999	766183530	99.71%	6619808	10497507	0.29%	28.26%
RC0550	269	47.95%	382782668	798333270	99.57%	6396083	10941601	0.50%	28.39%
RC0551	232	51.01%	331138865	649153120	99.66%	5506392	8794077	0.29%	31.84%
RC0552	292	52.66%	67027007	127290044	99.77%	1049538	1580236	0.21%	25.05%
RC0553	284	53.18%	405182246	761881820	99.61%	6721970	10444212	0.32%	24.73%
RC0554	298	50.93%	424458347	833391650	99.68%	7036032	11212419	0.26%	45.83%
RC0555	296	54.38%	422535317	777073640	99.52%	6983384	10652998	0.54%	20.46%
RC0556	299	52.04%	426728570	819997010	99.54%	7066201	11201111	0.27%	38.39%
RC0557	265	50.14%	378124331	754103420	99.57%	6278924	10308447	0.27%	27.83%
RC0558	278	49.26%	396556904	805022400	99.41%	6612663	10995097	0.29%	27.36%
RC0559	255	52.39%	363189135	693301350	99.76%	6033966	9421350	0.15%	35.12%
RC0560	266	48.08%	379692022	789783750	99.52%	6321849	10612879	0.30%	32.66%
RC0561	327	50.00%	465922970	931800940	99.82%	7746638	12772867	0.25%	31.19%
RC0562	256	52.86%	364610095	689766280	99.79%	6056042	9475034	0.20%	31.48%
RC0563	299	55.56%	68550864	123372928	99.71%	1077260	1542251	0.91%	14.76%
RC0564	197	39.89%	280742264	703853708	99.65%	4328558	8773360	0.17%	37.52%
RC0565	181	51.71%	257726999	498444936	99.64%	3976663	6287627	0.23%	39.91%
RC0566	274	52.43%	391044711	745812130	99.68%	6487735	10210479	0.34%	27.26%
RC0567	213	53.96%	303114090	561752450	99.71%	5024467	7708823	0.20%	32.05%
RC0568	174	50.84%	247642751	487088332	99.76%	3830953	6177399	0.21%	30.82%
RC0569	324	51.09%	74347509	145528250	99.84%	1251027	1959983	0.20%	17.71%
RC0570	274	50.23%	390856835	778138236	99.58%	6121555	9891951	1.01%	23.15%
RC0571	588	52.89%	838644294	1585655700	99.72%	10272025	15410149	0.39%	17.79%
RC0572	328	60.70%	507404648	835955724	99.86%	5143741	8730498	0.42%	6.05%
RC0573	981	56.44%	1527465558	2706140968	99.79%	19652532	34656712	0.34%	8.96%
RC0574	226	49.30%	322850370	654886680	99.79%	5374046	8897626	0.17%	31.28%
RC0575	288	51.02%	410864850	805224980	99.74%	6810657	10953336	0.21%	25.32%
RC0576	250	52.85%	357071889	675655400	99.76%	5927258	9282549	0.19%	33.87%
RC0577	276	52.64%	393189650	746884530	99.34%	6512211	10211096	0.54%	37.62%
RC0578	299	49.82%	426850579	856817160	99.66%	6649294	10808504	0.89%	31.94%
RC0579	217	38.37%	308978482	805301840	99.67%	5134834	10866647	0.25%	22.97%
RC0580	284	46.42%	405017837	872455850	99.63%	6741622	11966861	0.25%	26.82%
RC0581	297	53.07%	424008554	798954864	99.66%	6557643	10119081	0.21%	32.61%
RC0582	231	46.62%	329665220	707074410	99.71%	5485179	9676330	0.18%	30.16%
RC0583	332	48.33%	473428262	979551020	99.72%	7876132	13375906	0.23%	18.69%
RC0584	277	45.43%	395427954	870419410	99.74%	6578144	11932350	0.23%	27.52%
RC0585	296	52.57%	422584150	803880120	99.66%	6558695	10135181	0.89%	32.70%
RC0586	281	46.98%	401071344	853790840	99.70%	6214238	10702845	0.22%	28.87%
RC0587	270	53.82%	385258092	715869770	99.61%	6395518	9794949	0.42%	33.60%
RC0588	277	46.94%	394640093	840707490	99.73%	6540972	10894464	0.25%	45.09%
RC0589	275	48.78%	391960541	803541130	99.77%	6512874	10972469	0.20%	28.17%
RC0590	264	47.59%	376835217	791790116	99.69%	5827930	9940983	0.18%	43.75%
RC0591	324	52.92%	461444527	871999984	99.68%	7114268	11026970	0.23%	32.69%
RC0592	273	47.56%	388852290	817529872	99.55%	6023482	9917471	0.91%	27.50%
RC0593	213	51.06%	304128355	595667632	99.81%	4686555	7508243	0.15%	40.44%
RC0594	181	44.87%	257883655	574725760	99.83%	4271789	7664092	0.16%	35.57%
RC0595	254	49.31%	362028122	734229440	99.78%	6019821	10084506	0.16%	27.45%
RC0596	289	58.31%	450518723	772622690	99.48%	6289327	10688430	0.24%	18.32%
RC0597	327	58.17%	508870695	874827030	99.66%	7168406	12165996	0.33%	13.24%
RC0598	477	50.18%	679616168	1354291740	99.88%	7282565	14634629	0.36%	0.045
RC0599	268	55.37%	61428213	110934084	99.60%	969217	1404093	0.86%	18.13%
RC0600	319	47.46%	73141646	154120330	99.82%	1233797	2059937	0.18%	20.76%
RC0601	243	50.25%	346276042	689136910	99.74%	5739771	9422863	0.19%	40.23%
RC0602	267	50.48%	61258489	121354170	99.86%	1030044	1638064	0.18%	22.58%
RC0603	271	51.18%	385899128	753997650	99.73%	6392657	10321447	0.19%	28.56%
RC0604	306	50.23%	436126354	868255290	99.71%	7220265	11898416	0.25%	23.96%
RC0605	274	48.47%	390138947	804958000	99.65%	6483590	11045260	0.23%	27.11%
RC0606	282	48.42%	401360656	828898910	99.78%	6676005	11353632	0.18%	33.14%
RC0607	278	53.28%	396604639	744377060	99.79%	6587528	10233943	0.17%	26.49%
RC0608	296	43.34%	422194192	974110772	99.56%	6582460	11876655	0.83%	27.85%
RC0609	299	43.00%	426833441	992706300	99.60%	6657438	12210379	1.03%	25.11%
RC0610	275	47.53%	392021727	824785360	99.67%	6508422	11242417	0.20%	33.59%
RC0611	175	47.89%	249848987	521759988	99.81%	3877620	6634238	0.19%	23.47%
RC0612	287	51.72%	409175471	791064012	99.76%	6335210	10054304	0.19%	30.62%
RC0613	277	49.14%	394364322	802457900	99.71%	4862106	7744995	0.40%	19.12%
RC0614	299	49.32%	425965898	863720620	99.49%	6637012	10862854	1.08%	25.57%
RC0615	223	51.13%	317646484	621209400	99.77%	5276388	8522367	0.17%	34.03%
RC0616	237	46.18%	338131919	732164510	99.78%	5632606	10011069	0.18%	33.73%
RC0617	283	52.04%	65091101	125083560	99.63%	1095971	1691407	0.40%	17.73%
RC0618	367	56.12%	568313631	1012745378	99.47%	5833691	10551181	0.40%	5.96%
RC0619	250	55.63%	387611460	696767164	99.79%	4982862	8903217	0.32%	8.35%
RC0620	541	58.41%	837098290	1433102568	99.83%	8539169	14831038	0.13%	26.62%
RC0621	468	57.33%	724077611	1262968490	99.84%	7378018	13125849	0.47%	7.07%
RC0622	169	52.09%	240959098	462593760	99.59%	3706492	5864036	0.30%	19.36%
RC0623	296	48.92%	422289219	863246304	99.66%	6511300	10811196	0.23%	31.40%
RC0624	256	45.04%	365641525	811826190	99.74%	6085253	11131103	0.18%	36.42%
RC0625	208	51.93%	296177016	570305050	99.74%	4979421	7781770	1.27%	46.14%
RC0626	391	59.27%	605795454	1022114640	99.82%	6164528	10653601	0.48%	7.83%
RC0627	259	47.30%	368526064	779176790	99.73%	6125461	10715964	0.18%	35.25%
RC0628	303	49.32%	431775889	875376504	99.72%	5603875	9064895	0.28%	18.85%
RC0629	296	54.14%	68068095	125737592	99.75%	1070563	1573609	0.92%	17.30%
RC0630	283	51.06%	403605963	790429640	99.68%	6236589	10017679	0.20%	30.31%
RC0631	261	48.23%	59928930	124261700	99.78%	758136	1180307	0.43%	11.93%
RC0632	303	48.77%	432192272	886262904	99.74%	6698722	11265782	0.24%	17.35%
RC0633	515	56.73%	733773349	1293389146	99.73%	7484177	13373036	0.24%	14.23%
RC0634	242	51.65%	55614448	107675128	99.64%	876504	1342462	0.99%	18.02%
RC0635	298	50.65%	424692139	838413590	99.43%	7073979	11494975	0.55%	27.72%
RC0636	244	50.08%	347440628	693769192	99.71%	5372833	8787078	0.22%	31.49%
RC0637	251	50.07%	357894266	714804396	99.65%	5554802	9033147	0.20%	35.19%
RC0638	307	49.83%	437373641	877715336	99.54%	6824628	11098199	1.04%	19.24%
RC0639	306	36.82%	436765579	1186116400	99.72%	7257611	15946120	0.23%	23.98%
RC0640	250	50.36%	356949452	708846040	99.69%	5911656	9662203	0.26%	27.87%
RC0641	213	47.68%	303918765	637404950	99.72%	5054915	8725180	0.21%	30.23%
RC0642	299	53.91%	426630428	791349600	99.74%	5236111	7685307	0.39%	31.09%
RC0643	267	49.88%	380399328	762638590	99.75%	6326871	10512488	0.18%	18.33%
RC0644	544	53.83%	775117976	1439884220	99.59%	12066867	18282848	1.07%	10.60%
RC0645	339	54.93%	483139391	879625596	99.81%	7430479	11199464	0.20%	14.47%
RC0646	211	44.49%	300355902	675173892	99.73%	4667756	8535271	0.19%	24.99%
RC0647	287	50.65%	408819446	807160550	99.79%	6799204	10985518	0.18%	25.48%
RC0648	237	48.13%	54331867	112874972	99.63%	856367	1403899	0.23%	18.07%
RC0649	299	47.73%	425926758	892344460	99.73%	7080206	12173280	0.18%	34.79%
RC0650	323	48.01%	460937120	960148490	99.76%	7653266	13174279	0.18%	29.82%
RC0651	218	49.08%	310883410	633474940	99.66%	5163587	8662214	0.22%	25.19%
RC0652	296	48.71%	421681569	865698400	99.58%	7021699	11905566	0.26%	22.76%
RC0653	311	48.18%	71477897	148351420	99.78%	1199633	1972880	0.19%	21.18%
RC0654	309	47.69%	440164081	923030010	99.81%	7288559	12632808	0.15%	35.12%
RC0655	298	50.84%	424563163	835076410	99.77%	7061025	11471724	0.19%	25.89%
RC0656	385	52.76%	88346836	167438534	99.84%	1162780	1698613	0.29%	11.21%
RC0657	363	74.82%	517223893	691331460	99.70%	6708704	7334706	0.35%	12.64%
RC0658	298	52.60%	425203786	808366020	99.81%	7056051	11079225	0.15%	41.41%
RC0659	203	48.97%	289901234	591982650	99.70%	4829093	8124215	0.23%	32.54%
RC0660	233	47.27%	332699289	703801350	99.80%	5538653	9698071	0.19%	24.80%
RC0661	329	50.62%	75468497	149087528	99.67%	1193484	1843706	0.98%	15.66%
RC0662	274	48.56%	390097200	803314820	99.83%	6484870	11006448	0.15%	32.04%
RC0663	275	48.94%	392329006	801672852	99.71%	6096035	9921556	0.94%	34.79%
RC0664	265	49.32%	377299677	765013948	99.64%	5822115	9673846	0.23%	33.75%
RC0665	295	47.78%	420081323	879227440	99.68%	6997045	12044997	0.30%	21.29%
RC0666	299	47.29%	68757854	145408970	99.84%	1162402	1958669	0.16%	22.63%
RC0667	299	43.05%	68718279	159624570	99.82%	1159997	2135940	0.16%	13.50%
RC0668	299	49.44%	426907261	863492468	99.74%	6599975	10917787	0.21%	29.96%
RC0669	266	50.81%	378572513	745014620	99.68%	6280185	10225108	0.22%	28.50%
RC0670	321	52.38%	457101044	872681856	99.78%	7078601	11083672	0.22%	23.98%
RC0671	339	49.37%	482739224	977877400	99.63%	5932800	9394560	0.40%	12.79%
RC0672	499	59.71%	712034844	1192477200	99.74%	6813312	11638316	0.40%	13.76%
RC0673	293	50.69%	417073705	822846300	99.64%	6438174	10384776	0.28%	14.98%
RC0674	281	48.01%	400356744	833847770	99.77%	6668089	11350395	0.18%	39.11%
RC0675	325	50.69%	463778903	914937400	99.79%	7184231	11597221	0.22%	29.21%
RC0676	293	59.71%	454036858	760436406	99.85%	4606839	7936148	0.40%	8.23%
RC0677	451	49.73%	642640965	1292351574	99.72%	8293417	13333638	0.27%	12.95%
RC0678	351	44.56%	80604470	180901140	99.74%	1354360	2443265	0.31%	6.12%
RC0679	326	46.00%	465122314	1011193190	99.77%	7733187	13734282	0.14%	46.40%
RC0680	196	50.73%	279044321	550077664	99.79%	4323918	6966551	0.17%	29.11%
RC0681	291	49.16%	414577639	843404940	99.78%	6887193	11603681	0.20%	27.64%
RC0682	278	48.77%	396607126	813157800	99.66%	6608945	11180932	0.22%	29.27%
RC0683	256	49.97%	364685566	729739156	99.77%	5650738	9240402	0.16%	33.21%
RC0684	297	53.56%	68119315	127176804	99.43%	1069824	1574504	1.16%	20.81%
RC0685	229	46.88%	326936684	697380530	99.78%	5448755	9582541	0.19%	27.17%
RC0686	261	41.26%	59849809	145059908	99.74%	944759	1709044	0.25%	11.12%
RC0687	274	48.65%	390855734	803391470	99.59%	6523430	11024469	0.34%	27.86%
RC0688	261	73.75%	59885612	81199996	99.86%	940428	1065331	0.23%	10.70%
RC0689	188	50.16%	267601381	533481900	99.78%	4455886	7371795	0.18%	16.52%
RC0690	292	50.89%	415885760	817222376	99.81%	6420847	10336890	0.15%	43.66%
RC0691	247	47.55%	352365894	741066550	99.65%	5850415	9951330	0.35%	34.55%
RC0692	277	47.64%	394680102	828523424	99.48%	6120074	10431424	0.24%	29.01%
RC0693	205	50.90%	291610868	572890920	99.67%	4842795	7880760	0.35%	23.36%
RC0694	101	13.45%	144533180	1074992310	99.76%	2402628	14549623	0.27%	8.33%
RC0695	332	56.43%	516712504	915615460	99.83%	5274854	9539805	0.44%	6.24%
RC0696	452	59.87%	644398768	1076255200	99.73%	6201010	10544341	0.39%	17.45%
RC0697	557	54.16%	794498188	1466822700	99.76%	9728022	14269779	0.40%	17.47%
RC0698	596	75.32%	849895483	1128391300	99.86%	10454897	11257572	0.37%	17.55%
RC0699	321	49.45%	458295226	926692852	99.74%	7107583	11795759	0.24%	17.12%
RC0700	529	59.04%	824199874	1396044160	99.69%	11531159	19421163	0.35%	8.48%
RC0701	292	52.86%	415857242	786654872	99.74%	6406823	9910211	0.21%	15.48%
RC0702	364	51.72%	519266589	1004059700	99.69%	6365017	9734019	0.43%	16.38%
RC0703	475	53.28%	676704804	1270178576	99.73%	8701405	16286015	0.26%	13.82%
RC0704	306	50.93%	435659255	855417924	99.75%	6735830	10868847	0.23%	16.11%
RC0705	372	51.87%	529708073	1021319900	99.74%	6500489	9913910	0.39%	17.36%
RC0706	408	46.41%	581613589	1253188700	99.71%	9027940	15575164	0.88%	14.75%
RC0707	165	17.22%	37910895	220180450	99.62%	639575	2952936	0.50%	7.00%
RC0708	286	47.57%	407634399	856855650	99.72%	6785288	11720734	0.17%	32.96%
RC0709	293	49.78%	417058739	837766440	99.73%	6933085	11488221	0.19%	31.47%
RC0710	215	46.22%	306817289	663820150	99.59%	5124333	9116711	0.42%	19.06%
RC0711	296	50.88%	421823397	829089852	99.66%	6573884	10523568	0.97%	18.99%
RC0712	278	48.02%	396818701	826299856	99.74%	5159115	8533076	0.25%	22.60%
RC0713	280	48.87%	398948598	816349668	99.60%	6241714	10394045	1.07%	13.10%
RC0714	290	48.29%	413708927	856689404	99.69%	6413278	10897213	0.27%	13.87%
RC0715	494	76.92%	704239901	915583876	99.86%	9047711	9711639	0.24%	17.13%
RC0716	239	48.62%	54935794	112984716	99.61%	862063	1392860	0.26%	10.39%
RC0717	578	53.82%	823653994	1530286254	99.64%	8458591	15885281	0.34%	12.34%
RC0718	247	46.10%	352660726	765067832	99.45%	5461236	9584758	0.29%	24.27%
RC0719	286	48.00%	408179399	850317930	99.63%	6761974	11503691	0.29%	35.77%
RC0720	296	51.04%	67881991	133001824	99.86%	1062671	1657528	0.18%	23.29%
RC0721	298	53.16%	68385547	128631292	99.74%	1072240	1610896	0.20%	23.09%
RC0722	293	44.57%	417197242	936118448	99.68%	6481085	11879724	0.26%	20.63%
RC0723	279	49.87%	397591229	797325970	99.75%	6608263	10956302	0.17%	27.01%
RC0724	298	49.30%	424778252	861602348	99.66%	6590670	10972265	0.24%	17.05%
RC0725	347	75.94%	494575086	651276908	99.79%	7702254	8539023	0.94%	14.99%
RC0726	324	50.59%	461953217	913107092	99.72%	7129602	11568589	0.24%	19.88%
RC0727	451	51.20%	642267600	1254362748	99.54%	10005157	15934336	1.18%	11.02%
RC0728	298	52.91%	424729818	802736594	99.76%	5488054	8297420	0.22%	23.14%
RC0729	304	47.41%	433301161	913888600	99.72%	6704236	11567951	0.22%	30.49%
RC0730	300	51.01%	427210955	837462088	99.80%	6625482	10638363	0.20%	24.34%
RC0731	296	42.65%	422195927	989887150	99.66%	7017074	13547481	0.23%	26.94%
RC0732	299	54.49%	68631221	125940710	99.72%	1150606	1701354	0.27%	12.27%
RC0733	267	49.33%	380524457	771402240	99.84%	6321295	10599956	0.16%	27.25%
RC0734	297	50.47%	423559618	839153924	99.79%	6561885	10665033	0.20%	26.80%
RC0735	267	48.40%	381058596	787248700	99.65%	6324504	10700447	0.31%	32.96%
RC0736	298	48.42%	68528511	141520436	99.82%	1081410	1762292	0.20%	11.70%
RC0737	332	75.34%	473335478	628295040	99.82%	7355335	8239933	0.23%	15.63%
RC0738	274	51.28%	390956047	762430936	99.77%	6048375	9692412	0.23%	20.84%
RC0739	299	52.49%	426042031	811614580	99.74%	7072112	11164300	0.22%	24.96%
RC0740	296	46.76%	67914646	145245804	99.71%	1073065	1809701	0.93%	7.47%
RC0741	314	50.73%	448282342	883586270	99.74%	7453026	12099216	0.27%	31.97%
RC0742	286	52.00%	407310099	783253720	99.71%	6290115	9947303	0.24%	21.41%
RC0743	240	53.72%	342556006	637721210	99.76%	5685867	8712476	0.23%	38.83%
RC0744	149	42.45%	213078816	501983040	99.72%	3326182	6347549	1.03%	19.18%
RC0745	297	48.69%	424062091	870934910	99.68%	5503311	9013955	0.29%	17.88%
RC0746	297	53.86%	423693927	786639980	99.76%	7026571	10814163	0.18%	25.17%
RC0747	298	53.82%	424993819	789599872	99.77%	6569030	10031313	0.22%	25.04%
RC0748	279	40.17%	63955003	159205130	99.68%	1073008	2150573	0.23%	21.57%
RC0749	296	45.59%	68004461	149173180	99.84%	1072700	1816882	0.19%	23.52%
RC0750	287	48.86%	408967891	837094324	99.80%	6348654	10630980	0.18%	27.03%
RC0751	298	49.26%	425229332	863304272	99.77%	5512541	8907374	0.20%	26.84%
RC0752	266	48.20%	379710670	787786892	99.75%	5917325	9934136	0.84%	34.59%
RC0753	216	52.76%	51278856	97186976	99.92%	520726	982586	0.41%	5.91%
RC0754	322	56.40%	501647299	889414100	99.66%	4788320	8710080	0.52%	13.44%
RC0755	264	58.63%	410976826	700953852	99.62%	5262399	8996379	0.34%	11.92%
RC0756	520	60.82%	809399232	1330721210	99.68%	11387735	18564605	0.28%	14.01%
RC0757	243	54.09%	346499418	640558020	99.77%	5352770	8148424	0.20%	28.04%
RC0758	318	48.18%	452627704	939381432	99.76%	5810980	11908316	0.21%	15.17%
RC0759	252	46.24%	358692189	775705770	99.76%	5977584	10694503	0.25%	15.86%
RC0760	297	55.55%	423765383	762917160	99.83%	5461647	7900831	0.18%	19.91%
RC0761	190	45.76%	271520649	593316500	99.49%	4544165	8150495	0.53%	15.77%
RC0762	448	53.58%	638257404	1191134300	99.76%	7836896	11577583	0.37%	20.91%
RC0763	371	53.55%	85121136	158970900	99.88%	1066794	1515789	0.37%	14.24%
RC0764	293	54.24%	417026593	768847940	99.70%	6882814	10586783	0.27%	11.20%
RC0765	329	43.17%	75428728	174734490	99.81%	1273745	2332428	0.17%	13.84%
RC0766	296	48.61%	421949844	868041966	99.50%	5458457	8952252	0.39%	11.85%
RC0767	302	48.23%	430347189	892366920	99.60%	6701185	11282668	1.03%	16.32%
RC0768	298	51.20%	425259173	830635794	99.78%	5496030	8519260	0.18%	31.78%
RC0769	493	76.05%	702217721	923339628	99.87%	9076610	9798395	0.24%	15.92%
RC0770	303	54.53%	431473595	791232686	99.76%	5568029	8173431	0.23%	31.03%
RC0771	313	48.80%	445807759	913492564	99.83%	6903395	11615152	0.16%	28.84%
RC0772	294	51.01%	418755996	820944390	99.75%	6965433	11254726	0.26%	26.54%
RC0773	283	50.25%	404116532	804262970	99.74%	6716360	10979302	0.21%	24.60%
RC0774	295	53.10%	420214467	791383136	99.77%	6478305	10072329	0.20%	18.07%
RC0775	332	50.91%	473887277	930857372	99.72%	6126252	9619413	0.25%	13.62%
RC0776	321	55.17%	73661944	133517484	99.71%	1152669	1676111	0.29%	10.86%
RC0777	245	54.00%	349375618	646952660	99.77%	5391702	8225649	0.19%	16.64%
RC0778	441	50.89%	629229643	1236368300	99.74%	7737301	12005224	0.41%	13.89%
RC0779	367	47.97%	522760701	1089877460	99.69%	7297844	14994160	0.40%	8.31%
RC0780	299	51.95%	426022183	820094240	99.63%	7082741	11286780	0.41%	14.54%
RC0781	300	50.90%	427152957	839225702	99.73%	5513393	8665067	0.25%	19.17%
RC0782	404	55.67%	575440884	1033698680	99.80%	8094203	14283246	0.18%	19.93%
RC0783	287	50.58%	409686261	810051620	99.64%	6805545	11127223	0.47%	14.49%
RC0784	538	50.35%	766560754	1522459626	99.84%	7872957	15740827	0.48%	0.0793
RC0785	407	51.37%	580842219	1130736700	99.62%	7143444	10991952	0.39%	13.55%
RC0786	300	50.08%	427134368	852929456	99.71%	6618891	10826247	0.19%	25.44%
RC0787	299	31.40%	425605109	1355255200	99.73%	5237566	13051491	0.38%	19.27%
RC0788	284	50.72%	404442596	797464360	99.64%	6743843	10967515	0.37%	23.96%
RC0789	306	51.62%	70157900	135923248	99.79%	917058	1371307	0.25%	12.76%
RC0790	146	12.62%	208034932	1649012260	99.79%	3461914	22435762	0.33%	4.10%
RC0791	220	56.63%	343091223	605839776	99.69%	3525607	6333228	0.64%	8.82%
RC0792	302	59.86%	469477743	784351084	99.55%	6011088	10068524	0.35%	12.60%
RC0793	449	59.87%	698984762	1167541300	99.79%	6634070	11445895	0.40%	16.88%
RC0794	413	49.97%	588455053	1177709080	99.89%	6037187	12187134	0.45%	7.01%
RC0795	420	52.96%	599156460	1131353826	99.81%	6139676	11715298	0.51%	5.54%
RC0796	349	55.68%	82846452	148792882	99.82%	837194	1523925	0.48%	5.60%
RC0797	414	55.64%	95053404	170824900	99.71%	1183211	1626755	0.62%	9.59%
RC0798	415	53.80%	590918374	1098415756	99.72%	7612578	11367650	0.31%	14.40%
RC0799	300	52.39%	427171363	815363700	99.80%	5249148	7879864	0.31%	35.87%
RC0800	368	50.03%	524560768	1048481922	99.69%	6782760	10770372	0.26%	12.24%
RC0801	290	50.02%	413037632	825735050	99.53%	6892275	11373603	0.54%	13.93%
RC0802	296	53.76%	68072549	126627500	99.78%	854839	1217226	0.33%	13.49%
RC0803	490	72.21%	112620978	155955300	99.86%	1415650	1555953	0.41%	9.53%
RC0804	296	51.15%	422428358	825849032	99.63%	5469276	8538743	0.27%	17.81%
RC0805	300	51.93%	427053814	822376202	99.77%	5516326	8490433	0.24%	16.65%
RC0806	296	48.82%	422656202	865741080	99.71%	6567673	10873565	0.19%	29.94%
RC0807	299	52.36%	426772501	815107900	99.77%	5246883	7929992	0.36%	21.20%
RC0808	448	61.74%	696875192	1128764084	99.74%	9030247	14486749	0.90%	15.83%
RC0809	388	52.79%	553742737	1048884664	99.74%	8594935	13291760	0.90%	15.02%
RC0810	529	51.99%	753534043	1449457064	99.73%	9712613	14964868	0.26%	16.37%
RC0811	442	76.42%	629780729	824088224	99.85%	8124488	8744246	0.24%	14.89%
RC0812	313	48.69%	445783160	915612530	99.68%	7444872	12630699	0.38%	16.18%
RC0813	300	50.98%	427235186	837969110	99.65%	5521883	8649148	0.23%	20.83%
RC0814	298	51.85%	424704575	819031252	99.72%	6583669	10414931	0.25%	19.11%
RC0815	1329	52.86%	1894424050	3583997220	99.73%	24364954	36811836	0.19%	34.50%
RC0816	389	51.18%	553935047	1082233600	99.68%	9182968	14880096	0.27%	11.88%
RC0817	298	51.54%	425289861	825134200	99.81%	5226055	8022375	0.33%	22.06%
RC0818	423	51.90%	602334663	1160468822	99.83%	7780453	11985532	0.22%	20.62%
RC0819	365	50.84%	520486107	1023821304	99.80%	6735973	10571657	0.20%	18.86%
RC0820	423	46.66%	603134926	1292506020	99.85%	6462332	13951787	0.43%	7.13%
RC0821	183	42.66%	261130377	612153150	99.69%	4370703	8445379	0.26%	18.12%
RC0822	299	53.10%	426640473	803488782	99.76%	5501558	8308491	0.24%	19.96%
RC0823	434	53.19%	618306279	1162393300	99.75%	7585064	11301070	0.37%	17.21%
RC0824	440	56.37%	627236309	1112710600	99.70%	7642976	10796088	0.37%	20.16%
RC0825	315	76.42%	448672182	587098996	99.87%	5779219	6227929	0.22%	15.94%
RC0826	435	50.23%	619557787	1233518196	99.58%	8009258	12733190	0.34%	14.11%
RC0827	328	45.75%	468288847	1023642986	99.66%	6034624	10477980	0.25%	12.89%
RC0828	263	41.72%	374984419	898902620	99.63%	6251580	11952144	0.43%	11.41%
RC0829	352	46.42%	501155457	1079684728	99.66%	7816847	13682441	0.93%	14.48%
RC0830	360	51.90%	513891441	990195032	99.75%	7942846	12575593	0.20%	18.24%
RC0831	383	53.06%	88010306	165868640	99.70%	1149947	1681882	0.22%	10.90%
RC0832	364	49.20%	518787523	1054391548	99.60%	8083189	13359862	1.07%	16.74%
RC0833	273	46.85%	388915094	830188200	99.74%	4803214	8074421	0.41%	13.29%
RC0834	307	76.64%	437441058	570765624	99.84%	6767960	7485863	0.23%	15.28%
RC0835	298	50.49%	424135469	840067200	99.80%	5233317	8177923	0.35%	20.07%
RC0836	361	52.58%	514965227	979350890	99.67%	8536226	13480143	0.21%	16.19%
RC0837	309	55.40%	70896952	127983914	99.77%	714334	1307471	0.26%	10.56%
RC0838	368	51.97%	525281719	1010783500	99.70%	6433986	9806615	0.38%	14.07%
RC0839	385	75.16%	548623574	729926168	99.83%	7110621	7743356	0.27%	17.23%
RC0840	462	54.10%	657947019	1216087870	99.74%	8465670	12544378	0.26%	16.73%
RC0841	262	43.54%	373182628	857004652	99.75%	5816442	10909384	0.26%	11.22%
RC0842	390	53.33%	556343101	1043168800	99.72%	6824351	10126152	0.41%	17.63%
RC0843	428	49.98%	610812705	1222095656	99.71%	9501312	15061005	0.94%	14.24%
RC0844	476	55.74%	678413713	1217122340	99.78%	8694194	12577831	0.26%	18.49%
RC0845	295	51.60%	420755397	815354100	99.77%	5173779	7892849	0.38%	18.94%
RC0846	306	47.44%	436197059	919525740	99.63%	7277387	12657574	0.30%	12.78%
RC0847	264	53.41%	375806161	703681340	99.75%	5771001	8883231	0.19%	19.30%
RC0848	355	49.71%	506576358	1019027760	99.78%	7848474	12905514	0.21%	17.97%
RC0849	467	52.33%	107276002	204982100	99.86%	1346141	1949068	0.35%	10.91%
RC0850	297	52.37%	423891467	809462576	99.70%	5477104	8372981	0.26%	15.37%
RC0851	264	75.64%	375695833	496669740	99.63%	6272828	7067165	0.71%	11.17%
RC0852	430	53.79%	613667231	1140768100	99.68%	7499402	11061796	0.43%	15.64%
RC0853	401	54.34%	571164413	1051180756	99.67%	7344935	10855762	0.32%	15.16%
RC0854	581	75.32%	827679693	1098914700	99.88%	10188717	10961122	0.36%	17.47%
RC0855	321	52.69%	457621720	868531160	99.66%	7585753	11964322	0.24%	12.91%
RC0856	250	44.15%	357038364	808652390	99.63%	5913776	11071075	0.25%	11.58%
RC0857	393	55.79%	559824606	1003377300	99.72%	6833889	9762555	0.39%	14.27%
RC0858	121	17.17%	173023260	1007674880	99.64%	2681923	12554824	0.24%	12.81%
RC0859	433	55.73%	617935599	1108757400	99.78%	5885038	10786993	0.35%	19.19%
RC0860	516	51.75%	735769640	1421730260	99.75%	9490082	14643479	0.24%	15.59%
RC0861	340	52.06%	485199508	932050396	99.70%	7505204	11866104	0.25%	13.48%
RC0862	329	50.78%	468501963	922667360	99.63%	7250574	11734117	0.29%	17.84%
RC0863	487	63.68%	754365030	1184662824	99.84%	7601146	12333170	0.39%	14.15%
RC0864	416	58.97%	98757557	167462504	99.84%	992166	1709837	0.42%	4.91%
RC0865	344	52.99%	81525206	153852526	99.84%	827031	1576749	0.43%	4.27%
RC0866	362	59.75%	563079507	942349248	99.78%	5755466	9840580	0.48%	6.10%
RC0867	302	57.12%	469898445	822584140	99.61%	6561961	11402845	0.23%	19.13%
RC0868	404	56.23%	575865560	1024052700	99.76%	5479269	9960621	0.35%	16.80%
RC0869	221	48.57%	314524912	647509940	99.71%	5209007	8891811	0.21%	11.53%
RC0870	763	53.70%	1087237729	2024527600	99.71%	13292264	19678553	0.41%	15.29%
RC0871	396	50.97%	564999846	1108545652	99.62%	8784263	14059607	1.03%	14.55%
RC0872	428	51.51%	609912913	1184086400	99.79%	7501189	11496007	0.38%	18.62%
RC0873	345	52.82%	491980941	931456700	99.82%	6009689	9039307	0.37%	17.26%
RC0874	466	54.76%	664361980	1213292592	99.74%	6789370	12553780	0.23%	17.64%
RC0875	347	53.98%	494731503	916593060	99.62%	6456985	11693322	1.01%	15.12%
RC0876	264	55.52%	376373268	677921138	99.82%	4830014	7013446	0.22%	13.60%
RC0877	418	53.40%	596065288	1116155906	99.71%	7668211	11521220	0.31%	15.01%
RC0878	298	55.65%	424245803	762400442	99.75%	4322422	7870410	0.21%	14.14%
RC0879	431	52.26%	614739737	1176378400	99.58%	7513466	11404028	0.40%	16.98%
RC0880	403	61.31%	623671766	1017160200	99.73%	5923138	9943700	0.40%	11.33%
RC0881	249	52.71%	384977840	730416240	99.60%	4949347	9343404	0.35%	13.16%
RC0882	453	60.82%	704470640	1158364162	99.81%	7203510	12107705	0.44%	7.61%
RC0883	472	53.59%	734612242	1370786772	99.77%	7515964	14283865	0.55%	6.11%
RC0884	564	58.45%	877365666	1501057518	99.72%	8954037	15663498	0.46%	12.59%
RC0885	1045	50.91%	1489943114	2926466000	99.54%	18284434	28241172	0.41%	20.36%
RC0886	287	52.46%	408739933	779102940	99.77%	6779144	10766984	0.22%	14.03%
RC0887	198	47.99%	281770027	587184710	99.36%	4694215	8072761	0.64%	12.21%
RC0888	413	52.12%	589000357	1130003046	99.78%	7609630	11678280	0.22%	16.64%
RC0891	301	55.74%	466754634	837368638	99.84%	4775891	8716062	0.47%	7.25%
RC0892	406	51.13%	578699024	1131865200	99.88%	6201898	12233751	0.37%	0.0455
RC0893	204	17.44%	291307585	1670014340	99.71%	3765244	16952108	0.29%	11.36%
RC0894	359	51.97%	512487426	986189062	99.70%	6607136	10162622	0.26%	14.65%
RC0895	537	49.83%	765884083	1536913630	99.70%	9864336	15839715	0.22%	17.14%
RC0896	452	52.26%	644872611	1233978712	99.78%	9944981	15673084	0.18%	15.83%
RC0897	309	49.91%	440489776	882582540	99.59%	7334441	12138214	0.28%	12.97%
RC0898	422	54.18%	96893447	178842212	99.58%	1521925	2229891	1.04%	6.05%
RC0899	374	52.82%	85871647	162573800	99.77%	1074194	1551925	0.40%	10.70%
RC0900	155	26.20%	221397317	845114224	99.69%	3423868	10589554	0.28%	10.81%
RC0901	328	51.39%	467297042	909348664	99.73%	6015669	11575350	0.24%	16.20%
RC0902	297	55.66%	462833592	831509430	99.87%	4740920	8675902	0.43%	6.08%
RC0903	372	57.52%	579378218	1007218178	99.86%	5896674	10491926	0.45%	5.93%
RC0904	423	61.40%	658967522	1073221450	99.75%	9255841	14937179	0.27%	16.90%
RC0905	272	50.40%	387955498	769724884	99.74%	5988963	9766211	0.23%	15.61%
RC0906	320	47.95%	455812354	950588468	99.66%	7110036	12047434	0.93%	14.23%
RC0907	414	53.27%	590767934	1108996110	99.72%	6336515	11979224	0.50%	0.0639
RC0908	195	59.42%	302732485	509481222	99.82%	3064186	5313424	0.47%	5.23%
RC0909	376	56.84%	582645600	1024984178	99.71%	5949959	10665212	0.32%	13.69%
RC0910	278	48.91%	396690272	811090012	99.50%	6200187	10259805	1.13%	16.02%
RC0911	351	47.14%	500684435	1062051830	99.44%	8294515	14540038	0.63%	9.40%
RC0912	457	50.34%	651388017	1294002600	99.62%	7964325	12532019	0.42%	16.01%
RC0913	408	54.99%	634518861	1153923978	99.14%	6530790	12040229	0.49%	8.77%
RC0914	412	50.29%	587193540	1167695340	99.67%	9769839	16019094	0.30%	16.09%
RC0915	287	52.20%	65896798	126246640	99.73%	1035324	1570434	0.27%	8.88%
RC0916	431	41.94%	613872401	1463619552	99.66%	9555039	18347100	0.90%	9.96%
RC0917	341	49.97%	485706669	971936312	98.98%	6325224	10010958	0.57%	15.66%
RC0918	412	46.69%	586694438	1256499410	99.79%	6018282	12992496	0.55%	6.34%
RC0919	160	53.14%	248974903	468559168	99.81%	2540719	4865900	0.54%	3.88%
RC0920	463	56.80%	659935507	1161855200	99.72%	6294112	11314316	0.39%	14.36%
RC0921	318	48.10%	452626809	940977694	99.67%	5841720	9670594	0.26%	16.00%
RC0922	546	50.03%	777757252	1554520000	99.75%	9536522	15066598	0.39%	20.31%
RC0923	468	51.61%	666475798	1291265500	99.73%	8195585	12550212	0.41%	14.18%
RC0924	553	58.62%	789025427	1346101900	99.79%	7494571	13111704	0.31%	16.31%
RC0925	401	46.27%	570959311	1233922960	99.83%	5865294	12772298	0.53%	6.16%
RC0926	524	49.06%	746533073	1521729152	99.86%	7640273	15724773	0.53%	6.74%
RC0927	421	51.42%	600025813	1166874968	99.79%	7714132	14876728	0.36%	7.50%
RC0928	329	52.19%	469510503	899689900	99.72%	6037615	11431766	0.29%	13.69%
RC0929	532	51.57%	757911167	1469765070	99.86%	8119572	15846438	0.41%	7.80%
RC0930	310	53.07%	442494523	833858016	99.81%	5680242	10608440	0.20%	16.17%
RC0931	387	56.66%	552231360	974694300	99.64%	5248228	9452065	0.38%	14.65%
RC0932	242	80.26%	344537007	429284940	100.00%	4845638	6111746	0.00%	1.35%
RC0933	368	50.78%	84510019	166435178	99.78%	1112852	1682558	0.23%	9.00%
RC0934	297	46.86%	422706721	902103584	99.75%	6542094	11448664	0.21%	16.89%
RC0935	344	52.90%	490104278	926436800	99.73%	4675288	9003766	0.36%	15.73%
RC0936	405	57.34%	576736247	1005759674	99.80%	5875157	10373857	0.21%	18.16%
RC0937	326	46.55%	464044923	996928520	99.74%	7708587	13679159	0.21%	17.80%
RC0938	398	50.86%	567199479	1115144466	99.84%	5810937	11544156	0.50%	0.0525
RC0939	314	53.37%	448093904	839666012	99.80%	6912562	10675018	0.21%	12.58%
RC0940	398	62.28%	619755882	995155722	99.75%	6395090	10433485	0.46%	8.99%
RC0941	366	59.50%	570432637	958780432	99.73%	7365221	12294240	0.89%	13.42%
RC0942	243	57.58%	378955302	658173950	99.73%	5335813	9162730	0.31%	14.15%
RC0943	464	52.39%	661285610	1262146590	99.81%	7060391	13609028	0.39%	0.076
RC0944	436	57.72%	621898416	1077514800	99.80%	5911060	10475148	0.33%	17.26%
RC0945	418	50.82%	595506260	1171683000	99.76%	7322259	11384382	0.34%	15.82%
RC0946	438	50.35%	682074210	1354710032	99.68%	8797196	17256164	0.92%	14.38%
RC0947	427	57.32%	608459381	1061464544	99.69%	6206778	10971803	0.24%	17.31%
RC0948	258	52.42%	367745797	701551288	99.81%	4713028	8911972	0.23%	14.65%
RC0949	347	60.39%	536880933	888985260	99.82%	5441565	9256868	0.43%	9.35%
RC0950	505	53.37%	781671412	1464628570	99.80%	8013125	15166513	0.40%	6.34%
RC0951	281	60.04%	435368247	725081408	99.84%	4415603	7564760	0.43%	7.74%
RC0952	427	56.84%	661365110	1163490264	99.87%	6745301	12095012	0.36%	7.85%
RC0953	505	58.49%	719417289	1230086820	99.74%	7334798	12730146	0.26%	13.72%
RC0954	287	54.37%	446245424	820770776	98.37%	4547390	8530149	0.42%	6.21%
RC0955	392	44.78%	559174483	1248795810	99.59%	5990252	13436100	0.43%	5.85%
RC0956	339	53.95%	483813877	896731600	99.83%	6201487	11403800	0.18%	16.63%
RC0958	99	16.60%	153941965	927598012	99.69%	1980388	11601500	0.26%	7.84%
RC0959	469	53.03%	668959921	1261451876	99.77%	8675533	16066590	0.90%	16.32%
RC0960	236	55.44%	336277482	606587844	99.72%	4376406	7737923	0.89%	8.96%
RC0961	470	57.18%	669662720	1171131600	99.79%	6373886	11364020	0.34%	17.81%
RC0962	361	49.96%	514554979	1029930160	99.89%	7223069	14220593	0.31%	0.0839
RC0963	403	58.12%	574442614	988352500	99.71%	5475912	9619341	0.35%	15.52%
RC0964	571	64.38%	889032090	1380948642	99.79%	9023935	14405733	0.26%	18.82%
RC0965	474	55.13%	112415392	203924916	99.85%	1127145	2065966	0.41%	6.38%
RC0966	399	55.69%	617946626	1109638040	99.83%	6306415	11509054	0.44%	6.26%
RC0967	424	56.14%	660190878	1176075642	99.70%	6745899	12247077	0.47%	5.90%
RC0968	410	57.90%	634444247	1095808008	99.80%	6434011	11423055	0.43%	6.72%
RC0969	312	58.12%	482585856	830345616	99.87%	4894855	8649453	0.43%	5.47%
RC0970	353	52.95%	81052573	153064524	99.75%	1065636	1554374	0.25%	12.67%
RC0971	477	51.83%	679700739	1311513850	99.70%	8754871	13533440	0.26%	16.84%
RC0972	336	54.81%	523160942	954580152	99.86%	5350913	9959386	0.41%	5.24%
RC0973	316	54.91%	488702378	890057660	99.86%	6292484	11413708	0.33%	6.02%
RC0974	302	54.23%	467679629	862384952	99.77%	4776084	8938000	0.46%	6.81%
RC0975	396	58.34%	613172149	1050973486	99.79%	6248328	10947359	0.44%	6.26%
RC0976	260	31.41%	370762556	1180568952	99.73%	4785500	14868853	0.21%	16.35%
RC0977	181	25.89%	257761894	995491490	99.72%	4287750	13514646	0.21%	13.06%
RC0978	420	59.50%	650900171	1093919266	99.88%	6618124	11407799	0.44%	8.84%
RC0979	389	43.57%	89400551	205211172	99.88%	1137229	2575345	0.27%	4.86%
RC0980	325	52.64%	463631744	880714448	99.89%	5966171	11221889	0.33%	9.86%
RC0981	411	61.97%	640088095	1032898000	99.73%	6077695	10130588	0.44%	13.95%
RC0982	379	53.65%	87131298	162413720	99.85%	1464054	2205054	0.18%	13.88%
RC0983	424	53.79%	659479652	1226032228	99.79%	8502716	15719770	0.32%	7.92%
RC0984	300	52.89%	427420795	808174010	99.60%	7097352	11063574	0.26%	29.72%
RC0985	438	54.08%	681686449	1260416484	99.81%	6987821	13142410	0.42%	6.12%
RC0986	453	58.57%	705583922	1204647506	99.85%	7230852	12578014	0.45%	12.05%
RC0987	451	59.53%	701674563	1178697114	99.83%	7171114	12295942	0.48%	6.86%
RC0988	580	47.67%	137483576	288427062	99.75%	1390511	2929737	0.41%	4.51%
RC0989	402	58.93%	625162106	1060864166	99.14%	6414885	11086502	0.44%	7.86%
RC0990	170	54.99%	241934825	439977604	99.64%	3126362	5615367	0.26%	16.44%
RC0991	347	54.26%	494619144	911582988	99.78%	6342141	11600485	0.19%	16.76%
RC0992	230	31.68%	328202310	1036048230	99.84%	4622887	14219771	0.35%	0.0509
RC0993	417	56.71%	594906051	1049031800	99.68%	5685480	10206827	0.41%	13.24%
RC0994	381	50.20%	543792023	1083323836	99.51%	8475784	13745936	1.17%	13.12%
RC0995	323	56.15%	500497863	891330654	99.84%	5072930	9281592	0.48%	5.83%
RC0996	348	55.28%	496593029	898310610	99.89%	5321293	9720738	0.36%	0.0755
RC0997	520	51.55%	741023069	1437620256	99.82%	9534180	18345545	0.40%	7.45%
RC0998	482	41.46%	687827866	1658820150	99.56%	7367009	17820945	0.44%	0.0522
RC0999	395	53.32%	563696673	1057192338	99.79%	5748555	10912422	0.25%	15.71%
RC1000	108	27.96%	153304985	548355200	99.69%	1984060	6872679	0.28%	9.90%
RC1001	395	60.53%	614625062	1015364406	99.73%	6261914	10577779	0.63%	11.27%
RC1002	526	44.78%	749966084	1674822716	99.86%	9694300	21321134	0.38%	7.16%
RC1003	627	58.02%	975888261	1681952622	99.82%	9938021	17540542	0.42%	9.07%
RC1004	499	54.92%	777018958	1414764320	99.59%	9973315	18144694	0.34%	8.65%
RC1005	1004	63.43%	1555337921	2452064542	99.76%	15563254	25475524	0.39%	8.76%
RC1006	377	54.68%	586869660	1073201666	99.15%	6040300	11215293	0.49%	8.53%
RC1007	330	52.62%	513823877	976475948	99.81%	5265298	10178096	0.51%	4.81%
RC1008	440	50.10%	685093605	1367389900	99.75%	6494659	13293922	0.39%	13.92%
RC1009	458	56.02%	652500486	1164806704	99.76%	8431438	14761819	0.88%	22.77%
RC1010	372	54.50%	575704745	1056330156	99.87%	7395539	13505527	0.32%	13.45%
RC1011	383	55.32%	593418978	1072793800	99.81%	6083100	11145413	0.36%	5.12%
RC1012	313	52.27%	484618171	927149916	99.84%	6235653	11863389	0.37%	6.88%
RC1013	539	57.55%	833958485	1449184720	99.82%	10692316	18615665	0.32%	9.45%
RC1014	402	55.06%	625621518	1136233742	99.69%	6397103	11836763	0.49%	4.91%
RC1015	500	58.67%	777847335	1325874230	99.79%	7950206	13838518	0.48%	6.35%
RC1016	511	53.44%	795723892	1488962820	99.78%	8141925	15492067	0.48%	6.34%
RC1017	536	53.65%	764272480	1424490288	99.84%	7833027	14753206	0.46%	0.084
RC1018	231	54.72%	329951571	603027270	99.87%	3540044	6526090	0.42%	0.0348
RC1019	465	70.01%	720201282	1028698494	99.78%	7198648	10699754	0.38%	36.79%
RC1021	376	49.48%	536630196	1084639116	99.72%	5466775	11190900	0.25%	12.08%
RC1022	267	43.57%	380705373	873708616	99.87%	4906045	11105753	0.34%	7.66%
RC1023	331	55.95%	471509014	842728110	99.76%	6639393	11673245	0.21%	16.94%
RC1024	296	54.74%	421456594	769896002	99.45%	4305222	7963775	0.31%	12.63%
RC1025	292	55.86%	416768682	746122274	99.82%	4250079	7726650	0.19%	16.12%
RC1026	412	56.78%	586737739	1033430078	99.82%	5975204	10691694	0.18%	18.54%
RC1027	335	56.23%	477628999	849418498	99.81%	4865209	8788889	0.19%	17.42%
RC1028	344	58.08%	490643908	844742468	99.79%	4982747	8748448	0.19%	16.72%
RC1029	412	56.52%	587207275	1038937410	99.65%	8283753	14344316	0.34%	16.80%
RC1030	571	60.89%	889400127	1460786300	99.72%	8442365	14287426	0.44%	16.35%
RC1031	495	58.00%	770776068	1329027178	99.84%	7872306	13861343	0.45%	8.25%
RC1032	430	57.96%	668857866	1154043358	99.81%	6834197	12027273	0.43%	7.40%
RC1033	361	60.08%	561341045	934356920	99.71%	7187334	12007315	0.26%	12.97%
RC1034	649	58.96%	1005270928	1705111120	99.88%	10213101	17729352	0.41%	9.90%
RC1035	231	55.47%	329156318	593443264	99.69%	4266290	7567406	0.24%	19.26%
RC1036	353	52.51%	83674222	159362618	99.90%	845658	1612780	0.40%	5.90%
RC1037	323	54.14%	460521652	850623540	99.72%	5915055	10812943	0.21%	15.70%
RC1038	299	51.95%	68728115	132304550	99.61%	1155944	1784937	0.35%	15.07%
RC1039	193	57.53%	300762672	522817096	99.82%	3076485	5452444	0.43%	6.22%
RC1040	403	56.28%	626946662	1113912690	99.85%	6394977	11604547	0.43%	6.75%
RC1041	446	58.92%	694210370	1178228760	99.63%	8967713	15079597	1.10%	14.51%
RC1042	418	58.75%	650221842	1106712304	99.63%	8413520	14172219	1.05%	15.43%
RC1043	342	37.87%	81206226	214461846	99.78%	819170	2151695	0.45%	3.21%
RC1044	273	51.34%	422378216	822632070	99.82%	4343894	8507982	0.40%	10.73%
RC1045	376	51.00%	89145164	174794316	99.86%	897886	1760787	0.37%	4.23%
RC1046	366	56.15%	521682599	929058306	99.76%	5304884	9606756	0.25%	15.49%
RC1048	332	55.66%	516113146	927329458	99.34%	5287129	9678126	0.47%	5.52%
RC1049	437	52.72%	622339375	1180540924	99.74%	6367553	12199020	0.23%	18.50%
RC1050	478	54.88%	681026055	1240873700	99.72%	6515177	12056895	0.37%	16.27%
RC1051	329	51.66%	511821167	990811848	99.10%	6591253	12706171	0.37%	7.65%
RC1052	543	58.92%	845335622	1434623470	99.57%	11862192	19928219	0.34%	6.16%
RC1053	263	55.19%	409082350	741161142	99.79%	4216155	7732510	0.49%	6.40%
RC1054	408	54.64%	634736123	1161751264	99.79%	6460423	12049533	0.47%	6.08%
RC1055	377	60.03%	586078801	976316242	99.84%	5963171	10188160	0.40%	6.28%
RC1056	447	55.54%	692314290	1246542728	99.68%	8944332	15959914	0.87%	8.89%
RC1058	373	56.61%	577651739	1020395474	99.83%	5895377	10623546	0.49%	6.51%
RC1059	533	55.65%	825286196	1482982446	99.83%	8410503	15393729	0.41%	10.32%
RC1060	389	59.81%	602598286	1007474140	99.87%	6097745	10500341	0.42%	8.98%
RC1061	354	47.68%	548848529	1151181716	99.83%	5565380	11911788	0.38%	7.20%
RC1062	559	61.44%	870567761	1417045400	99.77%	8258700	13906313	0.41%	16.81%
RC1063	335	61.98%	522225728	842518500	99.79%	4957750	8258292	0.40%	13.41%
RC1064	489	63.05%	761390481	1207538476	99.86%	7817581	12644707	0.42%	10.60%
RC1065	292	50.23%	416938894	830081280	99.82%	5824929	11324580	0.14%	0.3695
RC1066	273	57.45%	423044205	736308956	99.85%	4281595	7669516	0.42%	7.32%
RC1067	340	53.80%	526830894	979265774	99.85%	5396196	10172126	0.46%	5.05%
RC1068	371	56.36%	577353703	1024490302	99.86%	5927290	10685476	0.50%	9.70%
RC1069	232	51.87%	360699345	695387372	99.83%	3697857	7245599	0.51%	4.61%
RC1070	446	61.86%	691395061	1117700420	99.80%	7008397	11668037	0.48%	8.40%
RC1071	366	56.00%	566350108	1011405596	99.85%	5793516	10527394	0.47%	9.12%
RC1072	304	58.85%	473419498	804413890	99.76%	6625266	11184931	0.25%	14.93%
RC1073	250	57.54%	388614064	675436472	99.69%	4988497	8669713	0.26%	14.81%
RC1074	401	52.58%	571969124	1087795620	99.80%	6111614	11735170	0.39%	0.0661
RC1075	246	80.35%	56511745	70335860	100.00%	790339	1001408	0.00%	1.39%
RC1076	471	55.09%	729246849	1323707342	99.88%	7475709	13744623	0.42%	7.89%
RC1077	354	57.78%	548470699	949316246	99.89%	5560081	9882469	0.37%	5.92%
RC1078	448	56.74%	693368343	1221988600	99.67%	9727074	16893336	0.32%	11.09%
RC1079	267	54.05%	416111494	769899836	99.83%	5345459	9893833	0.36%	5.68%
RC1080	311	59.99%	481977387	803413018	99.84%	4893759	8365278	0.54%	8.33%
RC1081	319	56.99%	493252595	865482158	99.09%	4983027	8893630	0.38%	13.19%
RC1082	477	62.99%	742143687	1178190152	99.66%	9548200	15179008	0.30%	19.62%
RC1083	388	51.56%	604374805	1172173514	99.82%	6155985	12193598	0.42%	4.73%
RC1084	308	57.09%	479696672	840266752	99.74%	4907444	8752446	0.65%	9.44%
RC1085	272	51.96%	64555783	124240834	99.85%	653225	1261584	0.46%	2.63%
RC1086	170	57.42%	264994160	461475516	99.80%	2702894	4803838	0.42%	3.45%
RC1087	373	48.31%	88339616	182841092	99.82%	894752	1857255	0.43%	3.82%
RC1088	243	37.16%	57704786	155301160	99.74%	812346	2108096	0.25%	12.32%
RC1089	320	52.38%	455519925	869565628	99.80%	5842647	11055892	0.23%	15.82%
RC1090	334	49.92%	76594191	153427964	99.64%	975903	1900282	1.02%	7.69%
RC1091	454	49.42%	702979439	1422379292	99.77%	9048517	18214551	0.39%	6.80%
RC1092	404	49.42%	625773608	1266208670	99.33%	6417845	13138713	0.58%	6.06%
RC1093	282	59.66%	436831651	732197584	99.87%	4418978	7630983	0.41%	6.36%
RC1094	497	52.75%	774012489	1467457320	99.28%	10840106	20008558	0.40%	47.34%
RC1095	311	57.53%	484746941	842659334	99.79%	4973011	8805051	0.45%	12.16%
RC1096	542	56.21%	839592125	1493754188	99.81%	8520154	15461924	0.37%	10.27%
RC1097	459	46.26%	653779924	1413176908	99.63%	8422357	17837115	1.05%	8.04%
RC1098	326	53.37%	77329460	144903700	99.70%	739096	1374243	0.53%	12.78%
RC1099	441	53.43%	629160681	1177443984	99.88%	8117939	15055134	0.32%	7.14%
RC1101	448	61.43%	693134410	1128421026	99.69%	7039884	11768045	0.31%	13.70%
RC1102	432	55.95%	672729838	1202408426	99.75%	6879269	12552862	0.47%	5.21%
RC1103	375	50.04%	534101064	1067266900	99.84%	7517557	14742921	0.33%	0.0432
RC1104	494	59.36%	764310873	1287622552	99.71%	9939814	16523326	0.92%	13.12%
RC1105	268	41.34%	292960054	708675528	99.65%	4616838	8860825	1.01%	22.78%
RC1106	414	53.10%	589611282	1110419888	99.88%	7605471	14166411	0.32%	7.36%
RC1107	331	51.51%	75996071	147537450	99.70%	805376	1566021	0.50%	0.0422
RC1108	542	83.76%	128612267	153539800	100.00%	1195147	1531542	0.00%	2.14%
RC1109	437	57.93%	680700702	1175016920	99.81%	6979239	12281709	0.42%	8.32%
RC1110	379	53.33%	540537607	1013569476	99.77%	5516130	10471522	0.27%	14.02%
RC1111	397	57.73%	618396872	1071177094	99.81%	6323179	11179419	0.45%	7.23%
RC1112	359	48.93%	512006247	1046333848	99.81%	5380506	11082043	0.52%	0.0414
RC1113	381	47.94%	90307183	188391698	99.77%	915863	1918374	0.43%	4.99%
RC1114	399	50.64%	94593759	186798680	99.88%	960530	1891485	0.40%	5.33%
RC1115	455	62.10%	708620215	1141044544	99.73%	9169171	14661093	0.86%	14.45%
RC1116	558	62.10%	868757238	1398877732	99.84%	8892319	14628319	0.43%	10.78%
RC1117	292	54.91%	453965490	826798420	99.77%	6347267	11488466	0.23%	14.96%
RC1118	331	54.58%	515275884	944043424	99.81%	6643319	12130795	0.31%	7.44%
RC1119	522	60.73%	812016699	1337185438	99.85%	8316693	13974752	0.38%	8.44%
RC1120	512	58.56%	797235538	1361429354	99.76%	8116912	14174640	0.47%	7.04%
RC1121	400	56.96%	622054997	1092179984	99.81%	6373853	11357635	0.50%	5.36%
RC1122	266	53.58%	411525687	768035084	99.87%	4218886	7973830	0.48%	5.37%
RC1124	442	58.18%	688199419	1182912544	99.84%	6991001	12332351	0.39%	5.90%
RC1125	397	59.07%	618170935	1046518450	99.86%	6306653	10918210	0.41%	7.33%
RC1127	353	58.45%	549177670	939573428	99.74%	5618196	9781716	0.64%	10.09%
RC1128	425	48.75%	606378485	1243878688	99.83%	6209797	12862712	0.50%	6.49%
RC1129	267	81.61%	380384689	466082160	100.00%	4861285	6114477	0.00%	1.35%
RC1130	545	81.39%	843335052	1036141800	100.00%	7876074	10343520	0.00%	2.13%
RC1131	545	81.39%	843335052	1036141800	100.00%	7876074	10343520	0.00%	2.13%
RC1132	545	81.39%	843335052	1036141800	100.00%	7876074	10343520	0.00%	2.13%
RC1133	545	81.39%	843335052	1036141800	100.00%	7876074	10343520	0.00%	2.13%
RC1134	545	81.39%	843335052	1036141800	100.00%	7876074	10343520	0.00%	2.13%
RC1135	325	46.56%	74694053	160437480	99.53%	1268140	2162976	0.50%	10.80%
RC1136	299	50.73%	426633932	840936250	99.60%	7094319	11536568	0.33%	25.02%
RC1137	545	81.39%	843335052	1036141800	100.00%	7876074	10343520	0.00%	2.13%
RC1138	277	44.72%	302503408	676426870	99.65%	5061887	9123429	0.35%	23.87%
RC1139	271	51.57%	386078820	748648180	99.83%	6414743	10277610	0.25%	29.04%
RC1140	545	81.39%	843335052	1036141800	100.00%	7876074	10343520	0.00%	2.13%
RC1141	545	81.39%	843335052	1036141800	100.00%	7876074	10343520	0.00%	2.13%
RC1142	545	81.39%	843335052	1036141800	100.00%	7876074	10343520	0.00%	2.13%
RC1143	545	81.39%	843335052	1036141800	100.00%	7876074	10343520	0.00%	2.13%
RC1144	297	54.22%	68215666	125812072	99.55%	1079084	1575383	1.04%	17.82%
RC1145	545	81.39%	843335052	1036141800	100.00%	7876074	10343520	0.00%	2.13%
RC1146	545	81.39%	843335052	1036141800	100.00%	7876074	10343520	0.00%	2.13%
RC1147	545	81.39%	843335052	1036141800	100.00%	7876074	10343520	0.00%	2.13%
RC1148	545	81.39%	843335052	1036141800	100.00%	7876074	10343520	0.00%	2.13%
RC1149	545	81.39%	843335052	1036141800	100.00%	7876074	10343520	0.00%	2.13%
RC1150	296	50.33%	422204088	838943350	99.48%	7007141	11430106	0.34%	30.26%
RC1151	270	40.79%	294983171	723176300	99.56%	4971245	9784277	0.61%	15.51%
RC1152	463	61.23%	716467155	1170146968	99.81%	7258053	12201876	0.54%	10.26%
RC1153	368	53.01%	569447113	1074239050	99.83%	5845920	11155697	0.45%	5.88%
RC1154	239	45.88%	371966506	810674518	99.84%	3818417	8435961	0.49%	5.11%
RC1155	292	55.70%	416712656	748191214	99.35%	4272170	7722576	0.38%	14.37%
RC1156	243	52.00%	346851498	666997736	99.39%	4477256	8486918	0.27%	13.49%
RC1157	313	62.78%	485433586	773217398	99.89%	4903760	8042116	0.37%	20.66%
RC1158	319	59.77%	493417086	825461188	99.84%	4999647	8622668	0.47%	5.49%
RC1159	490	61.85%	758623767	1226651590	99.84%	7702776	12786183	0.52%	9.76%
RC1160	479	61.05%	741549890	1214749900	99.78%	10408230	16969209	0.23%	7.23%
RC1161	367	50.50%	87057556	172395812	99.17%	886040	1763471	0.41%	2.77%
RC1162	479	62.04%	744936920	1200797078	99.85%	7630791	12546460	0.44%	10.51%
RC1163	480	61.35%	747375674	1218205000	99.72%	7073295	11932955	0.42%	13.62%
RC1164	140	52.58%	216428222	411616000	99.69%	2780690	5254925	0.33%	3.06%
RC1165	701	53.50%	1086092358	2030164154	99.67%	11114718	21031076	0.42%	6.76%
RC1166	279	58.26%	433883426	744721492	99.81%	5591727	9590591	0.36%	5.53%
RC1167	251	46.23%	59471119	128641162	99.80%	601040	1293894	0.43%	3.10%
RC1168	354	51.69%	547891148	1059941556	99.86%	5627870	11011075	0.40%	5.50%
RC1169	466	61.23%	724611276	1183369948	99.75%	7339037	12318741	0.27%	12.75%
RC1170	382	59.18%	594713108	1004998768	99.75%	7628667	12903936	0.24%	15.92%
RC1171	345	59.82%	536241688	896404040	99.79%	6857152	11496072	0.20%	19.33%
RC1172	301	58.98%	469279742	795635082	99.59%	4766027	8267766	0.39%	10.96%
RC1173	403	58.91%	627713836	1065493666	99.83%	6438044	11138490	0.46%	7.51%
RC1174	415	55.97%	646482103	1154954406	99.84%	6599027	12012454	0.43%	6.66%
RC1175	222	50.84%	346061429	680652732	99.83%	4464117	8744454	0.44%	5.10%
RC1176	242	52.47%	377133676	718809824	99.72%	4859633	9239476	0.43%	5.26%
RC1177	429	56.83%	668455573	1176233844	99.81%	6828016	12271497	0.48%	7.26%
RC1178	353	48.82%	83746541	171546428	99.86%	849382	1741304	0.46%	4.65%
RC1179	301	54.02%	468604181	867398254	99.83%	4794092	9034735	0.50%	4.74%
RC1180	468	59.60%	724275457	1215319044	99.84%	7352652	12631349	0.35%	7.01%
RC1181	386	54.67%	598292461	1094290660	99.87%	6124824	11401548	0.42%	10.40%
RC1182	288	57.77%	446092287	772164786	99.84%	4570142	8021402	0.48%	9.13%
RC1183	546	58.66%	850466779	1449868408	99.81%	8673059	15121693	0.47%	9.27%
RC1184	442	56.53%	684470733	1210849156	99.85%	6963299	12576243	0.35%	7.75%
RC1185	374	57.58%	578696616	1005006640	99.90%	5927211	10459836	0.41%	12.55%
RC1186	268	56.41%	414945870	735554136	99.82%	4239332	7624912	0.39%	7.40%
RC1187	206	57.80%	319646658	553029072	99.82%	3260949	5746606	0.66%	6.81%
RC1188	368	63.22%	569904627	901501078	99.88%	5940528	9498077	0.40%	11.90%
RC1189	355	61.05%	549405950	899877792	99.86%	5732827	9486468	0.43%	11.34%
RC1191	405	50.06%	96029320	191834730	99.80%	972117	1934056	0.40%	3.59%
RC1192	252	55.38%	392200001	708155612	99.85%	5061879	9109613	0.36%	6.92%
RC1193	399	56.07%	621171584	1107823276	99.76%	6344658	11540057	0.52%	6.24%
RC1194	308	50.41%	72945736	144711872	99.85%	736179	1461013	0.52%	4.35%
RC1195	331	58.08%	512444448	882280428	99.89%	5206387	9196247	0.44%	6.91%
RC1196	341	59.09%	528213160	893896102	99.90%	5359228	9309330	0.39%	7.19%
RC1197	412	57.16%	642023170	1123234388	99.85%	6551840	11707195	0.45%	5.81%
RC1198	539	57.64%	839409728	1456202786	99.79%	8551640	15170606	0.44%	5.68%
RC1199	471	57.72%	733504662	1270721422	99.78%	7482668	13249788	0.49%	6.67%
RC1200	573	57.56%	891783251	1549408016	99.81%	9068695	16126544	0.45%	5.70%
RC1201	427	59.58%	661826548	1110873012	99.82%	6706455	11556845	0.44%	10.86%
RC1202	297	59.44%	459314625	772731606	99.81%	4638583	8037877	0.45%	5.36%
RC1203	357	54.09%	553216628	1022720376	99.89%	5607372	10646153	0.41%	6.11%
RC1204	375	59.05%	581033177	983900256	99.78%	5945886	10240735	0.45%	10.65%
RC1205	465	58.09%	719954054	1239445460	99.87%	7357896	12891639	0.43%	7.40%
RC1206	380	58.95%	588178286	997766070	99.70%	8292056	13842751	0.31%	12.50%
RC1207	252	57.18%	390334462	682696800	99.60%	3750782	6657715	0.41%	13.31%
RC1208	276	57.55%	427565366	742918392	99.52%	5507514	9520861	0.26%	14.77%
RC1209	358	59.49%	553844152	930920916	99.86%	5606885	9713784	0.40%	5.90%
RC1210	297	46.07%	324086625	703469908	99.62%	5087676	8790476	0.92%	22.61%
RC1211	456	55.88%	710461064	1271513744	99.83%	9131060	16266297	0.29%	9.48%
RC1212	355	52.59%	548987689	1043870470	99.69%	5639089	10838786	0.45%	6.26%
RC1213	304	56.96%	473251032	830897302	99.79%	4917673	8720418	0.58%	10.54%
RC1214	481	59.69%	749164432	1255167054	99.87%	7670621	13108080	0.40%	9.67%
RC1215	386	56.84%	598034013	1052140872	99.87%	6077184	10949667	0.45%	6.58%
RC1216	268	59.30%	415589833	700833732	99.85%	4230163	7312517	0.46%	8.59%
RC1218	331	56.37%	513063928	910110914	99.86%	5275984	9475894	0.39%	5.78%
RC1219	545	81.39%	843335052	1036141800	100.00%	7876074	10343520	0.00%	2.13%
RC1220	425	60.61%	661866179	1092075644	99.82%	6732673	11408865	0.42%	5.59%
RC1221	339	60.63%	524506209	865040358	99.67%	5347342	8987519	0.55%	9.36%
RC1222	502	58.97%	776736679	1317174342	99.89%	7855874	13723212	0.42%	11.15%
RC1223	300	51.06%	464528127	909835520	99.82%	5982554	11632630	0.36%	4.31%
RC1224	428	52.28%	662266586	1266662314	99.76%	6754412	13067340	0.23%	16.52%
RC1225	364	55.84%	563859190	1009781100	99.62%	5428188	9851679	0.38%	17.32%
RC1226	288	54.61%	446189725	817089360	99.83%	4565151	8475258	0.40%	8.04%
RC1227	380	58.08%	591233430	1018035322	99.83%	6053769	10591700	0.44%	6.00%
RC1228	524	58.85%	812171249	1379973016	99.87%	8275271	14335994	0.40%	8.73%
RC1229	301	54.95%	465771485	847639736	99.82%	4767021	8831001	0.54%	4.92%
RC1231	397	57.65%	614034433	1065076024	99.40%	6270552	11061625	0.52%	8.17%
RC1232	470	60.08%	728586391	1212690200	99.72%	9460640	15541110	0.91%	13.66%
RC1233	358	53.22%	554988968	1042892596	99.86%	7131108	13351199	0.31%	8.05%
RC1234	277	50.27%	428920758	853205564	99.80%	5519567	10927584	0.37%	5.66%
RC1235	442	55.82%	683934525	1225218560	99.83%	7026076	12742490	0.45%	6.08%
RC1236	214	51.16%	331183046	647348014	99.81%	3383493	6732343	0.49%	5.57%
RC1237	545	81.39%	843335052	1036141800	100.00%	7876074	10343520	0.00%	2.13%
RC1238	364	45.37%	86365950	190348966	99.81%	873399	1911348	0.44%	4.32%
RC1239	321	56.93%	497401038	873692306	99.80%	5081360	9062771	0.45%	7.02%
RC1240	369	57.85%	87483257	151218082	99.83%	880194	1542171	0.46%	3.77%
RC1241	211	55.48%	326671920	588774734	99.83%	3316452	6131356	0.50%	4.17%
RC1242	387	58.17%	599544292	1030663940	99.83%	6057047	10740319	0.46%	6.72%
RC1243	323	55.54%	500356942	900941684	99.86%	5061710	9354265	0.37%	6.78%
RC1244	278	56.55%	430714638	761697886	99.84%	4396871	7919389	0.50%	5.00%
RC1245	257	54.58%	60946898	111669368	99.88%	611000	1132706	0.48%	3.14%
RC1246	300	54.82%	71210930	129908658	99.81%	713905	1314828	0.39%	4.66%
RC1247	306	58.34%	473112135	810949260	99.50%	6086809	10393167	0.25%	12.52%
RC1248	398	48.38%	616277519	1273739292	99.82%	6307609	13188094	0.57%	6.73%
RC1249	379	53.11%	586534294	1104405342	99.84%	6007536	11473264	0.45%	5.27%
RC1250	416	55.23%	644339927	1166571302	99.71%	6583614	12126834	0.51%	6.02%
RC1251	297	52.85%	459838527	870113256	99.80%	4714739	9012509	0.38%	8.20%
RC1252	307	57.60%	475076817	824829508	99.77%	4867053	8579299	0.43%	9.02%
RC1253	424	56.55%	659833189	1166784212	99.83%	6756775	12115290	0.41%	6.42%
RC1254	564	53.59%	877573918	1637496638	99.82%	8981689	16970871	0.38%	7.15%
RC1255	348	57.87%	539586141	932428394	99.85%	5507928	9696535	0.36%	8.09%
RC1256	379	58.13%	586806894	1009433100	99.89%	5992109	10488973	0.38%	8.78%
RC1257	300	45.89%	68788640	149897440	99.48%	1161839	2028017	0.62%	9.29%
RC1258	337	53.38%	524351625	982341648	99.83%	6735512	12560311	0.31%	6.68%
RC1260	515	58.45%	797638063	1364609938	99.82%	8101889	14175980	0.38%	11.43%
RC1261	351	52.74%	543553658	1030619008	99.86%	5566381	10701555	0.47%	8.12%
RC1262	383	58.12%	592632115	1019660300	99.86%	6001134	10605064	0.41%	9.69%
RC1263	380	58.17%	588077865	1010896962	99.85%	5953928	10521958	0.45%	6.47%
RC1264	358	56.44%	555065982	983540894	99.81%	5632929	10250839	0.49%	3.53%
RC1265	379	57.60%	586501210	1018157146	99.89%	6021034	10596983	0.41%	7.20%
RC1266	416	57.73%	644807966	1116942874	99.83%	6572084	11668220	0.52%	8.02%
RC1267	590	63.72%	913868415	1434155086	99.82%	9165824	14887747	0.42%	22.30%
RC1268	348	54.07%	538966138	996775060	99.26%	5480104	10278794	0.53%	9.09%
RC1269	321	60.12%	497771980	827947018	99.86%	5054194	8632168	0.41%	7.76%
RC1270	426	55.16%	101011106	183129578	99.87%	1014251	1859191	0.42%	6.28%
RC1271	335	59.70%	518986603	869347626	99.87%	5273211	9064223	0.44%	12.77%
RC1272	279	58.09%	432583159	744639330	99.80%	4389900	7758847	0.47%	8.32%
RC1273	330	57.68%	511057713	885991360	99.83%	5172676	9228293	0.50%	3.63%
RC1274	339	58.78%	524303958	892015162	99.83%	5334008	9279481	0.45%	4.68%
RC1275	481	52.40%	114158088	217878182	99.81%	1143251	2198549	0.50%	9.65%
RC1276	545	81.39%	843335052	1036141800	100.00%	7876074	10343520	0.00%	2.13%
RC1277	542	83.76%	128612267	153539800	100.00%	1195147	1531542	0.00%	2.14%
RC1278	526	52.38%	124627058	237927160	99.86%	1253200	2409971	0.41%	6.85%
RC1279	545	81.39%	843335052	1036141800	100.00%	7876074	10343520	0.00%	2.13%
RC1280	303	57.58%	469165937	814786642	99.84%	4795728	8480470	0.40%	7.34%
RC1281	345	57.97%	534861024	922715088	99.52%	6890208	11835209	0.26%	12.68%
RC1282	451	61.83%	697866630	1128698116	99.74%	9004267	14517502	0.89%	7.13%
RC1283	300	49.07%	71197925	145109304	99.87%	715623	1460349	0.41%	2.89%
RC1284	545	81.39%	843335052	1036141800	100.00%	7876074	10343520	0.00%	2.13%
RC1285	379	60.44%	586817773	970889058	99.85%	5962415	10128730	0.45%	7.62%
RC1286	592	59.80%	917031836	1533607556	99.89%	9320941	15945756	0.41%	10.18%
RC1287	301	56.94%	465686659	817902120	99.65%	6566093	11418150	0.29%	16.72%
RC1288	634	62.13%	981346833	1579623520	99.74%	12658688	20302327	0.89%	7.32%
RC1289	430	63.13%	665407762	1053985998	99.87%	6714731	10968482	0.39%	16.05%
RC1290	374	60.92%	579828241	951854622	99.88%	5881349	9929954	0.38%	6.53%
RC1291	513	59.13%	794849658	1344194736	99.88%	8080571	14031589	0.38%	10.65%
RC1292	167	40.81%	257961177	632107324	99.79%	2615067	6522251	0.45%	4.75%
RC1293	321	59.41%	496536049	835829106	99.90%	5028502	8713717	0.41%	8.35%
RC1294	362	49.16%	85883754	174718364	99.91%	863188	1758516	0.40%	5.69%
RC1295	347	58.49%	537008898	918163424	99.84%	5447873	9572432	0.58%	5.64%
RC1296	572	64.82%	886260852	1367279350	99.83%	8931581	14237314	0.47%	16.23%
RC1297	499	58.85%	773440864	1314172076	99.56%	7836610	13624237	0.35%	12.24%
RC1298	401	58.74%	621463485	1057992748	99.84%	6299536	11024277	0.45%	10.72%
RC1299	262	59.61%	406485964	681930144	99.86%	4126115	7112751	0.45%	8.76%
RC1300	281	59.49%	435563301	732152746	99.82%	4397037	7607363	0.46%	6.40%
RC1301	223	60.50%	344810169	569966932	99.83%	3500451	5949080	0.46%	7.48%
RC1302	404	57.81%	625203122	1081455712	99.87%	6319213	11237950	0.44%	11.32%
RC1303	409	57.56%	633815166	1101229364	99.82%	6429509	11452806	0.49%	9.11%
RC1304	228	40.29%	53985986	134000666	99.86%	542157	1353024	0.41%	4.50%
RC1305	303	54.80%	71903014	131221556	99.81%	720329	1325373	0.40%	6.40%
RC1306	296	50.65%	70188568	138571230	99.60%	977301	1852345	0.44%	4.85%
RC1307	294	52.76%	69607960	131926180	99.81%	699731	1335666	0.53%	5.17%
RC1308	424	58.93%	656149364	1113421258	99.83%	6662796	11606561	0.41%	8.07%
RC1309	343	57.90%	531116437	917297872	99.83%	5372984	9556310	0.49%	3.33%
RC1311	388	60.85%	600696974	987205578	99.84%	6093257	10306703	0.45%	8.62%
RC1312	442	57.42%	104798433	182508238	99.91%	1053521	1855080	0.42%	7.80%
RC1313	298	47.92%	325653453	679509616	99.69%	5084928	8464476	0.85%	29.72%
RC1314	434	54.23%	103001318	189950500	99.82%	1026382	1928948	0.41%	6.81%
RC1317	277	56.46%	65634870	116242468	99.82%	659049	1189001	0.43%	4.75%
RC1318	450	57.56%	106606603	185217224	99.91%	1068169	1885538	0.39%	2.88%
RC1319	541	61.93%	837625008	1352463822	99.77%	8485077	14106107	0.50%	15.37%
RC1320	628	61.09%	972150735	1591453464	99.85%	9842732	16588015	0.44%	10.80%
RC1321	298	50.73%	68441595	134912388	99.74%	1080006	1671810	0.93%	19.18%
RC1322	294	55.43%	67475365	121721320	99.71%	1129387	1641735	0.26%	14.89%
RC1323	298	53.19%	68447747	128683240	99.75%	1146277	1745510	0.22%	26.08%
RC1324	298	53.70%	68494039	127556728	99.78%	1070005	1595514	0.24%	16.72%
RC1325	302	55.26%	69391634	125583768	99.78%	1085796	1582954	0.22%	18.94%
RC1326	231	51.15%	53048122	103702690	99.76%	890232	1366400	0.21%	23.78%
RC1327	262	50.84%	60196638	118412420	99.62%	1016645	1611588	0.21%	20.48%
RC1328	405	50.68%	577989787	1140443430	99.64%	8146118	15718215	0.38%	5.74%
RC1329	383	47.69%	546151714	1145296440	99.64%	7071903	14533874	0.93%	5.96%

## Sheet: case
sample ID		effective average sequencing depth	Fraction of effective bases on target	Effective bases on target	Total effective bases	Fraction of reads mapped to genome	Uniquely mapped reads on target	Total uniquely mapped reads	Mismatch rate of effective reads on target	Duplication rate of reads on target
RC0001	tissue	784	53.28%	1117884867	2098012604	99.68%	17116985	26519457	0.24%	23.25%
RC0002	plasma	1700	49.64%	1855097100	3737091304	99.20%	28797916	46341444	1.03%	25.81%
RC0003	plasma	1622	56.70%	2312003979	4077881460	99.53%	35185882	51108787	0.85%	36.85%
RC0004	plasma	1705	50.07%	2429979361	4853007530	98.81%	40555412	66429971	0.51%	51.05%
RC0005	plasma	1797	49.69%	1960804705	3945980724	99.52%	30366318	48996508	0.86%	27.99%
RC0006	plasma	1636.06	38.19%	1785150802	4674946920	99.71%	29929501	62421438	0.91%	62.97%
RC0007	plasma	936	53.27%	1021603175	1917707848	99.33%	15712551	23708507	0.91%	27.66%
RC0008	plasma	2264	55.32%	519866424	939770300	99.40%	8750229	12603643	0.45%	62.70%
RC0009	tissue	2037.32	39.97%	2222973232	5561762570	99.74%	36851664	73997328	0.91%	52.44%
RC0010	tissue	1031	47.84%	1124783658	2350927532	99.64%	17500409	29101240	0.86%	34.68%
RC0011	tissue	1048	45.02%	1143383916	2539750520	99.42%	17883851	31475268	0.94%	32.63%
RC0012	plasma	1993.58	46.90%	457378175	975220890	99.69%	7721385	12930340	0.99%	56.79%
RC0013	plasma	1643.76	152.72%	1793547370	1174405120	100.00%	16777216	16777216	1.63%	0.00%
RC0014	plasma	1833.82	56.21%	420724687	748465936	99.35%	6436277	9013573	0.90%	43.14%
RC0015	tissue	972	26.87%	1060690930	3947094830	99.68%	17964004	51674834	0.86%	75.65%
RC0016	tissue	1882	45.14%	431826133	956625880	99.84%	7328193	12692666	0.85%	61.55%
RC0017	plasma	1337	35.28%	1458302147	4133684800	99.79%	24654598	54569751	0.83%	64.62%
RC0018	plasma	1545	53.61%	2203212129	4110034248	99.72%	33886691	52054445	0.22%	32.73%
RC0019	tissue	1064	39.03%	244093589	625341640	99.79%	4152896	8182275	0.87%	73.13%
RC0020	tissue	2299	55.16%	527526814	956348204	99.25%	8110045	11615425	0.91%	30.11%
RC0021	plasma	1230	36.92%	1341675963	3633996030	99.71%	22645885	47979800	0.92%	64.73%
RC0022	plasma	1032	45.56%	1126452943	2472559148	99.47%	17579678	30750878	0.97%	33.84%
RC0023	tissue	4414	55.63%	1012714939	1820305410	99.37%	17012836	24384708	0.99%	0.00%
RC0024	plasma	1132	46.44%	1235147968	2659893828	99.47%	19258804	33097606	0.88%	33.36%
RC0025	plasma	2392	45.36%	548709128	1209670188	97.63%	8568992	14915852	0.83%	25.35%
RC0026	plasma	1428	42.47%	327509278	771069180	98.50%	5568415	10233126	1.01%	0.00%
RC0027	tissue	1597.9	41.44%	1743514841	4207487060	99.80%	28989527	56108338	0.86%	57.96%
RC0028	plasma	1047	30.54%	1142675090	3741132570	99.72%	19294083	49823798	0.91%	54.32%
RC0029	plasma	940	52.84%	1340045642	2535927188	99.72%	20704150	32127405	0.21%	34.48%
RC0030	plasma	1580	51.97%	2251923308	4333063210	99.64%	37408245	59393288	0.25%	68.76%
RC0031	tissue	5663	59.26%	1300311641	2194336340	99.88%	21690811	29685417	0.17%	46.13%
RC0032	tissue	2183	41.62%	500772236	1203259890	99.77%	8494191	15972533	0.94%	47.58%
RC0033	plasma	2215	48.82%	508093764	1040818660	99.81%	8543079	13897213	0.92%	61.88%
RC0034	tissue	1751.18	44.26%	401763408	907644920	100.00%	6828682	11852188	0.82%	59.05%
RC0035	tissue	1368.81	48.83%	1493542573	3058388504	99.41%	23146587	38055472	1.05%	25.10%
RC0036	plasma	2434	42.59%	2656142163	6237265510	99.15%	44781125	83759973	1.03%	0.00%
RC0037	plasma	1022.04	32.16%	1115171150	3467859010	99.77%	18735937	45440255	0.87%	69.18%
RC0038	tissue	1724.33	40.08%	1881467964	4694421900	99.68%	31121753	62695605	1.06%	42.30%
RC0039	plasma	1539	39.52%	1678885540	4248167280	99.70%	28327400	56812489	0.89%	61.83%
RC0040	plasma	1037	31.49%	1131503898	3592888880	99.76%	19168135	47126348	0.88%	69.62%
RC0041	plasma	1606	47.93%	1751999099	3655346464	99.25%	27403433	45365215	1.03%	25.24%
RC0042	plasma	1021	40.76%	234334975	574844270	99.60%	3977104	7450962	1.04%	70.11%
RC0043	tissue	1607	46.24%	368779449	797501180	99.66%	6254607	10450888	0.93%	72.24%
RC0044	tissue	2301	49.05%	528011700	1076412190	99.80%	8878136	14417750	0.93%	56.76%
RC0045	tissue	1501	51.39%	1637726808	3186721876	99.40%	25112715	39377576	0.86%	40.10%
RC0046	tissue	1824	27.58%	1990434872	7215732230	99.47%	33365002	97172751	1.22%	0.00%
RC0047	plasma	3902	51.04%	895287600	1754090030	99.00%	15100916	23434414	0.97%	0.00%
RC0048	tissue	1796	47.21%	412101481	872918292	94.56%	6420381	10759593	0.81%	25.78%
RC0049	tissue	1831	47.01%	420014778	893434780	99.85%	7097963	11829602	0.86%	71.18%
RC0050	plasma	1605.85	50.45%	1752187890	3472817644	99.37%	27016387	43131547	0.96%	22.46%
RC0051	plasma	1002	31.40%	1093195487	3481037560	99.75%	18500252	45941365	0.89%	68.03%
RC0052	tissue	1254.7	38.17%	1369040531	3586772770	99.57%	23035245	47662154	1.01%	55.84%
RC0053	plasma	1533.21	40.20%	1672931326	4161798830	99.75%	27893239	55595388	0.90%	56.30%
RC0054	tissue	2173	53.72%	498543266	927991996	99.52%	7766520	11484670	0.95%	27.15%
RC0055	tissue	1358.7	45.80%	311720348	680606710	99.74%	5244689	8981574	0.94%	53.77%
RC0056	plasma	1972	42.37%	2151978519	5079471600	99.74%	36199441	68223769	0.93%	55.28%
RC0057	tissue	1833.77	36.86%	2000872310	5428850770	99.66%	33654615	72019773	0.93%	70.21%
RC0058	plasma	1368.62	48.16%	1493332970	3100846132	99.38%	22973205	38173198	0.87%	51.84%
RC0059	plasma	2288	48.01%	525036856	1093563940	99.85%	8885673	14697273	0.86%	56.44%
RC0060	tissue	721	44.49%	786214605	1767194332	99.77%	12334390	22095410	0.93%	33.18%
RC0061	tissue	774	49.58%	844248981	1702805992	99.67%	12827593	20747884	0.86%	54.57%
RC0062	plasma	1789	44.53%	410536002	921913160	99.77%	6988505	12162554	0.92%	68.52%
RC0063	tissue	1733.93	161.10%	1891938899	1174405120	100.00%	16777216	16777216	1.85%	0.00%
RC0064	tissue	1053	45.97%	1149482607	2500383280	99.45%	17964242	31093451	0.96%	35.00%
RC0065	tissue	1280	47.32%	1396982956	2952352392	99.37%	21843122	36601558	1.13%	36.74%
RC0066	plasma	1108	45.60%	1209315802	2652143880	99.50%	18911695	33068272	0.93%	30.30%
RC0067	plasma	1253	52.71%	1367116419	2593580788	99.36%	20466418	31490866	0.94%	43.67%
RC0068	peritoneal effusion	2012	50.13%	461673221	920975448	99.47%	7216233	11394275	0.85%	38.91%
RC0069	plasma	2228	53.65%	511097206	952669880	99.59%	8005921	11788449	0.90%	32.64%
RC0070	plasma	1509	38.98%	1646739354	4224703630	99.68%	27808047	56370422	0.99%	57.08%
RC0071	plasma	1587.03	35.87%	364103444	1015190050	99.75%	6083183	13535442	0.89%	52.15%
RC0072	tissue	1452.29	38.13%	1584628491	4155544750	99.80%	26729519	55411279	0.87%	53.71%
RC0073	pleural effusion	750	48.23%	1069589741	2217899488	99.65%	16730884	28029468	0.83%	41.01%
RC0074	plasma	1405	49.16%	1532756503	3117944156	99.50%	23820458	38960271	1.00%	34.65%
RC0075	tissue	1831	38.69%	1997649185	5163479930	99.67%	33734355	69703125	0.89%	51.28%
RC0076	plasma	1287.38	51.92%	1404693575	2705683980	99.37%	20778619	32454258	0.91%	50.39%
RC0077	plasma	1426.29	132.52%	1556266920	1174405120	100.00%	16777216	16777216	1.48%	0.00%
RC0078	tissue	357.85	37.93%	390462813	1029339896	100.00%	5794058	12035140	0.94%	64.81%
RC0079	tissue	916	53.50%	210251628	392977000	99.54%	3242004	4866630	1.03%	22.66%
RC0080	plasma	1314	37.04%	1433935608	3871248430	99.72%	24195003	51481063	0.87%	55.16%
RC0081	tissue	1650.69	42.64%	378709216	888182120	99.80%	6380320	11588769	0.82%	71.93%
RC0082	plasma	1327	48.68%	1448453398	2975449248	99.50%	22536652	36877078	0.89%	29.19%
RC0083	tissue	1519	48.64%	1656981252	3406358380	99.42%	25667377	42224357	0.90%	25.74%
RC0084	tissue	857	38.68%	196561976	508131050	99.75%	3347397	6568173	0.86%	79.97%
RC0085	tissue	1416.22	41.55%	1545278360	3719215572	99.63%	23978919	46370982	0.94%	31.19%
RC0086	plasma	1653.52	47.61%	1804198147	3789833784	99.63%	27858907	47091798	0.91%	22.93%
RC0087	tissue	2198	56.59%	504763690	891893440	99.63%	7924722	11145324	0.96%	21.82%
RC0088	plasma	1506.18	47.75%	345556299	723713040	99.71%	5382941	9026270	0.90%	31.34%
RC0089	tissue	1392	49.08%	1518495647	3094175460	99.26%	23133462	37800661	0.98%	45.83%
RC0090	plasma	2696	39.71%	2941826741	7408638930	99.11%	49276989	99909615	0.99%	0.00%
RC0091	tissue	2088	39.47%	2278387985	5772334470	99.04%	38533995	77605814	0.98%	0.00%
RC0092	plasma	1888	43.28%	433253147	1001106050	99.85%	7355323	13279175	0.85%	67.25%
RC0093	tissue	1316	57.14%	302216823	528932640	99.82%	4716187	6495772	0.85%	20.62%
RC0094	plasma	1236	27.38%	283470991	1035396040	97.65%	4834095	13677535	1.23%	0.00%
RC0095	plasma	1045	45.09%	1139884603	2528279004	99.61%	17831046	31526115	0.89%	30.33%
RC0096	plasma	620	33.74%	676636735	2005695784	99.54%	10619382	24406879	0.88%	72.25%
RC0097	tissue	2161	46.35%	495682867	1069440120	99.76%	8355221	14203699	0.91%	59.58%
RC0098	plasma	1509	54.97%	346500245	630348560	99.58%	5442141	7864500	0.90%	17.37%
RC0099	tissue	1923	48.43%	2098218662	4332108604	99.47%	32736051	53908310	1.03%	26.14%
RC0100	tissue	1949	38.57%	2126714005	5514279820	99.49%	35662654	74257611	0.90%	0.00%
RC0101	tissue	1553	50.33%	1694332444	3366664340	99.28%	26176230	41607871	0.91%	28.74%
RC0102	plasma	2787	41.00%	3041306092	7417514650	99.20%	51128128	100025646	0.96%	0.00%
RC0103	plasma	2797	40.14%	3051352198	7601594280	99.30%	51167735	102249451	1.01%	20.63%
RC0104	tissue	1608	47.95%	1754750607	3659357744	99.67%	27254944	45670827	0.89%	19.91%
RC0105	tissue	1644	47.66%	1793893973	3764128304	99.16%	27709060	46384008	0.91%	23.35%
RC0106	plasma	3900	52.35%	894816760	1709196090	99.41%	15099224	23084956	0.92%	0.00%
RC0107	tissue	2304	48.98%	2514347922	5133524652	99.46%	38751769	63915930	0.38%	21.05%
RC0108	plasma	3972	53.08%	911229771	1716655710	99.26%	14984581	22742738	1.02%	0.00%
RC0109	tissue	1771	53.91%	1932540887	3584539696	99.54%	29595833	44650054	0.84%	43.81%
RC0110	tissue	1831	37.54%	1997561280	5321085000	99.77%	33668277	71405270	0.86%	50.65%
RC0111	plasma	639	50.06%	697400563	1393018288	99.60%	10855370	17441072	0.85%	28.28%
RC0112	tissue	1385	36.16%	1511469565	4179500850	99.64%	25582582	55088487	0.89%	62.41%
RC0113	tissue	2268	41.92%	2474919370	5903874060	99.71%	41430638	79287511	0.90%	47.66%
RC0114	tissue	1262	32.69%	1376578415	4211111170	99.73%	23303289	56272899	0.88%	60.33%
RC0115	tissue	1564	39.64%	1706625319	4305579460	99.44%	28730866	58036067	0.56%	61.00%
RC0116	plasma	868	48.70%	947403598	1945536920	99.48%	14814941	24168407	1.01%	36.59%
RC0117	tissue	1589	38.76%	1733499873	4472090840	98.81%	29368807	60009340	1.08%	0.00%
RC0118	tissue	2499	56.74%	573309771	1010410272	99.13%	8935350	12503026	0.90%	31.53%
RC0119	tissue	1680	53.24%	385321423	723811916	95.09%	6091241	8810688	0.90%	47.98%
RC0120	plasma	2997	47.34%	688246746	1453690630	99.05%	11791978	19486757	1.12%	42.10%
RC0121	plasma	1734	54.86%	397804566	725061204	98.89%	6205163	8833873	0.83%	49.56%
RC0122	plasma	562	41.25%	613674644	1487680164	99.73%	9591694	18228620	0.78%	65.85%
RC0123	plasma	2242	42.38%	2446358396	5773053720	99.56%	41002583	78333508	0.96%	35.65%
RC0124	peritoneal effusion	1890	57.20%	433683120	758242728	99.57%	6759667	9392498	0.87%	27.68%
RC0125	tissue	738	46.02%	805451124	1750174360	99.63%	12626319	21841829	0.88%	26.96%
RC0126	plasma	1763	35.23%	1923342775	5459459880	99.72%	32210350	73083017	0.89%	49.64%
RC0127	tissue	1296	46.72%	297312786	636433280	99.83%	5022354	8496658	0.87%	49.89%
RC0128	plasma	1363	50.58%	1943397543	3842569220	99.57%	32159455	52705391	0.24%	0.00%
RC0129	plasma	1373	48.85%	1498287266	3067046804	99.66%	23299139	38271950	0.91%	22.68%
RC0130	plasma	2530	59.26%	580442411	979418232	99.64%	9051692	12229545	0.85%	26.46%
RC0131	tissue	1515	47.52%	1652916310	3478038464	99.14%	25591211	42868219	0.96%	28.35%
RC0132	tissue	1568	44.00%	359818041	817687780	99.70%	6124077	10633893	0.89%	69.41%
RC0133	tissue	878	47.04%	958193938	2037087888	99.61%	14985021	25448900	0.94%	30.14%
RC0134	tissue	1502	48.12%	1639314833	3406756848	99.55%	25476839	42398489	0.92%	21.37%
RC0135	plasma	3435	47.16%	787992664	1670944660	99.15%	13374908	22300976	0.95%	0.00%
RC0136	plasma	903	49.08%	984900044	2006589164	99.49%	15206678	24860792	1.05%	19.91%
RC0137	tissue	2847	45.01%	653663010	1452371480	99.20%	11113678	19372401	0.98%	37.41%
RC0138	tissue	183	19.82%	41970341	211796420	94.86%	666246	2507053	0.80%	94.33%
RC0139	plasma	176	12.80%	40360588	315405092	98.98%	640995	3776799	0.77%	93.35%
RC0140	plasma	1529	39.99%	350991002	877730916	99.54%	5445206	10880222	0.92%	31.72%
RC0141	plasma	198	20.67%	216492042	1047134232	98.89%	3427652	12500273	0.80%	92.10%
RC0142	plasma	3530	50.61%	809773149	1600017510	99.27%	13726599	21199674	1.02%	0.00%
RC0143	plasma	603	36.53%	657451634	1799852140	99.70%	10318246	22130180	0.82%	66.92%
RC0144	plasma	440	29.65%	480020798	1619048444	98.42%	7579186	19509745	0.85%	78.93%
RC0145	tissue	779	14.09%	849936606	6030352510	99.07%	14379408	80459137	1.22%	43.71%
RC0146	plasma	3718	45.11%	852941297	1890875700	99.27%	14418534	24668837	0.99%	0.00%
RC0147	plasma	1657	52.99%	2362458691	4458071992	99.80%	36633853	56415794	0.83%	32.65%
RC0148	tissue	1883	46.36%	432327943	932498420	99.53%	7286253	12076220	0.45%	68.76%
RC0149	plasma	2501	52.73%	574314420	1089124750	99.63%	9659810	14544091	0.43%	55.28%
RC0150	tissue	1481	31.86%	1616181281	5071986710	98.80%	27504551	67699645	1.16%	0.00%
RC0151	tissue	1185	49.98%	271843404	543934584	99.72%	4308438	6754745	0.95%	21.99%
RC0152	tissue	1086	56.46%	1548011184	2741606216	99.58%	23198638	33641476	0.90%	48.10%
RC0153	tissue	635	51.26%	692957169	1351816028	99.69%	10748334	16501397	0.81%	54.82%
RC0154	pleural effusion	863	32.42%	197915894	610475460	99.67%	3307072	7584411	0.94%	83.20%
RC0155	plasma	1269.42	35.24%	1385095159	3930842790	99.65%	23283837	51794586	0.91%	70.19%
RC0156	plasma	1106.66	36.43%	1207507516	3314633770	99.78%	20254945	43748575	0.85%	68.12%
RC0157	plasma	871.86	39.96%	200026262	500549420	99.83%	3362229	6412978	0.84%	85.21%
RC0158	plasma	1460.54	46.26%	335084385	724394510	99.70%	5688287	9601824	0.97%	62.71%
RC0159	tissue	1872.64	51.94%	2043290635	3933573040	99.47%	31178075	48685389	0.90%	24.49%
RC0160	tissue	265	23.75%	289252447	1217779008	99.21%	4474689	14366677	0.81%	88.49%
RC0161	plasma	3251	49.82%	745863569	1497263250	99.48%	12655680	19888312	0.93%	0.00%
RC0162	tissue	1880	41.45%	2680583095	6467378050	99.58%	44646017	88257745	0.44%	54.08%
RC0163	plasma	2878	51.92%	4103380235	7903604240	99.60%	67663359	108090380	0.52%	29.03%
RC0164	plasma	3485	43.36%	799493349	1843984450	98.66%	13308588	23889179	0.99%	0.00%
RC0165	tissue	2317	56.21%	531954603	946430888	99.68%	8363689	11654235	0.87%	34.36%
RC0166	tissue	1493	47.17%	1629360780	3454388404	99.77%	25632232	43122150	0.87%	28.84%
RC0167	tissue	667	43.11%	728187128	1689096200	99.20%	11044698	20298986	0.86%	71.90%
RC0168	tissue	1365	49.02%	1489890304	3039315240	99.58%	22931553	37653628	0.93%	27.26%
RC0169	tissue	836	42.29%	912340665	2157378180	99.50%	14348554	26923653	1.05%	27.00%
RC0170	plasma	3183	46.69%	730841060	1565199790	99.10%	12430038	20938354	0.99%	48.97%
RC0171	tissue	1280	45.66%	293957614	643816976	95.42%	4537871	7935677	0.96%	47.04%
RC0172	plasma	1134	31.21%	1237154877	3964030980	99.74%	20968727	52619459	0.86%	60.72%
RC0173	tissue	1292	34.52%	1409557433	4083580410	98.93%	23737284	54511280	1.13%	0.00%
RC0174	tissue	692	49.37%	754679124	1528634360	99.61%	11725724	18924652	0.90%	40.00%
RC0175	plasma	2218	47.63%	508769081	1068131960	99.80%	8620824	14163473	0.90%	59.16%
RC0176	tissue	1355.34	43.90%	1478852723	3368792188	98.77%	22471915	40132279	0.85%	42.13%
RC0177	tissue	1018	47.33%	1110995461	2347409644	99.47%	17484736	29280387	0.98%	25.89%
RC0178	plasma	2426	44.53%	2647204707	5944121820	99.26%	44082115	80165951	1.00%	0.00%
RC0179	plasma	929	33.19%	1013133142	3052561540	99.54%	17168505	39808645	0.96%	72.59%
RC0180	plasma	2532	50.84%	581429081	1143692480	99.61%	9790237	15345435	0.40%	53.14%
RC0181	tissue	2702	56.55%	619811227	1096015228	99.67%	9684331	13622682	0.93%	22.00%
RC0182	tissue	2080	51.87%	2269112067	4374615176	99.43%	35001285	54173050	0.99%	28.41%
RC0183	plasma	1505	37.32%	1642469455	4401086550	99.65%	27702278	58429524	0.94%	61.42%
RC0184	pleural effusion	1122	35.39%	1224668174	3460256590	99.58%	20552049	45443974	0.96%	69.78%
RC0185	tissue	1566	51.59%	359312491	696417944	99.62%	5653416	8679472	0.95%	22.02%
RC0186	tissue	945	51.81%	1347198946	2600382560	99.38%	20989615	32980925	0.87%	34.31%
RC0187	tissue	789	47.14%	181051631	384071776	97.17%	2859549	4622516	0.77%	77.57%
RC0188	tissue	614	49.50%	140935998	284723436	98.14%	2213932	3374381	0.80%	81.34%
RC0189	plasma	1313	38.66%	301179364	779004730	99.71%	5115472	9993308	0.98%	75.40%
RC0190	tissue	1195	50.47%	1304436059	2584547048	99.60%	20291209	32256415	1.04%	28.34%
RC0191	tissue	324	27.98%	74307051	265569688	99.39%	1195205	3028358	0.81%	84.39%
RC0192	tissue	1730	46.51%	1887309686	4057572284	99.35%	29537616	50721183	1.05%	13.21%
RC0193	tissue	1441	55.32%	2054753762	3714317068	99.59%	31332529	46709326	0.23%	26.42%
RC0194	tissue	1707	49.17%	1862688273	3788085480	99.41%	28858092	47052031	0.97%	20.35%
RC0195	plasma	1915	49.72%	439385085	883691270	99.67%	7415154	11580215	0.93%	66.90%
RC0196	plasma	1474	36.35%	1608754672	4425444380	99.73%	27151809	58608840	0.87%	66.73%
RC0197	tissue	587	46.20%	640448673	1386237948	99.51%	10099926	17234530	1.04%	33.64%
RC0198	tissue	928	46.61%	1012716954	2172948604	99.79%	15883619	27082873	0.84%	40.39%
RC0199	tissue	855	45.69%	933261951	2042802328	99.20%	13989134	23893626	0.82%	79.68%
RC0200	tissue	2581	42.02%	592636659	1410432870	98.99%	10058007	18674265	0.98%	58.09%
RC0201	plasma	1878	39.46%	2049510116	5193733070	99.41%	34487693	69284025	1.20%	0.00%
RC0202	plasma	3271	51.24%	750482686	1464742440	99.85%	12523160	19676892	0.89%	43.90%
RC0203	tissue	616	45.85%	671967914	1465491204	99.54%	10509895	18146591	0.94%	33.75%
RC0204	tissue	1688.47	52.49%	1842333248	3510000340	99.54%	28244644	43589315	0.98%	25.81%
RC0205	tissue	1653	50.49%	1803698673	3572319580	99.35%	27934092	44373307	1.05%	24.48%
RC0206	tissue	2891	53.62%	663337255	1237191992	99.50%	10381237	15402667	0.86%	28.23%
RC0207	plasma	2412	40.51%	2631571180	6496385700	99.02%	44465611	87386418	1.04%	0.00%
RC0208	tissue	1376	44.16%	1501618747	3400590056	99.21%	23403399	41729248	0.92%	31.62%
RC0209	tissue	1117	42.03%	1218445084	2899085284	99.74%	19254104	36097493	0.89%	49.56%
RC0210	tissue	873.31	46.56%	952891634	2046587584	98.93%	14683016	25142720	1.06%	21.57%
RC0211	tissue	1949	53.56%	447631260	835805040	99.44%	7541305	11185748	0.42%	72.55%
RC0212	tissue	1616	47.91%	1762779489	3679413536	99.17%	27628964	45856764	1.15%	22.36%
RC0213	tissue	1659	50.56%	1809968854	3580100916	99.28%	28025261	44481501	1.05%	21.16%
RC0214	tissue	758	53.19%	826637676	1554117540	99.56%	12618307	19170861	0.85%	34.32%
RC0215	plasma	1583	36.91%	1727508764	4680846310	99.76%	29171145	62114023	0.90%	56.93%
RC0216	tissue	1567.97	52.61%	1710855866	3251960884	99.15%	25916217	40133281	1.01%	25.49%
RC0217	tissue	1506	50.20%	1643307969	3273267484	99.21%	25268942	40265195	0.84%	31.00%
RC0218	plasma	1207.32	112.17%	1317334021	1174405120	100.00%	16777216	16777216	1.27%	0.00%
RC0219	tissue	2058	58.77%	472267459	803647636	99.58%	7268192	9890661	0.91%	24.64%
RC0220	plasma	2532	44.69%	2762697404	6182548400	99.09%	46555321	83325408	1.01%	0.00%
RC0221	pleural effusion	2633	49.20%	604059522	1227883510	99.86%	10145837	16345737	0.88%	45.08%
RC0222	tissue	618	51.75%	674073250	1302432064	99.59%	10460736	15978506	0.83%	52.66%
RC0223	plasma	1299	36.51%	1417121249	3881203550	99.78%	23898686	50948661	0.84%	66.74%
RC0224	plasma	1694.28	157.41%	1848674994	1174405120	100.00%	16777216	16777216	1.52%	0.00%
RC0225	tissue	781	44.97%	852243328	1895326304	99.62%	13352528	23628672	0.89%	27.47%
RC0226	plasma	827	30.81%	902554389	2929302460	99.72%	15302296	38438205	0.84%	74.35%
RC0227	plasma	1136.01	33.54%	1239526542	3695548220	99.72%	20833273	48891969	0.90%	69.25%
RC0228	tissue	1361.82	48.16%	1485921913	3085383172	99.49%	22838039	38009702	0.92%	38.96%
RC0229	plasma	1092.4	36.32%	1191945068	3281798030	99.70%	19985918	43462479	0.91%	62.64%
RC0230	plasma	1646	39.79%	1796455821	4515319200	99.68%	30226143	60497295	0.93%	57.77%
RC0231	tissue	670	37.73%	731242343	1938063840	99.39%	11518698	23889686	0.90%	60.17%
RC0232	plasma	1644	38.63%	1794248409	4644643500	99.76%	30275892	61850982	0.83%	63.79%
RC0233	plasma	1726.14	38.23%	1883440704	4926257420	99.76%	31527300	66103299	0.88%	54.86%
RC0234	tissue	1247	50.48%	1360434921	2694765136	99.57%	21079991	33437773	0.93%	33.67%
RC0235	plasma	1423.54	35.42%	1553267402	4385574900	99.65%	26025420	58561640	0.94%	55.71%
RC0236	tissue	1165	49.11%	1270929791	2587751284	99.58%	19710261	31886751	0.88%	40.71%
RC0237	plasma	1413	33.74%	1541848394	4569737130	99.63%	26083381	60870512	0.98%	64.74%
RC0238	tissue	1217	47.86%	1327881825	2774797392	99.38%	20780182	34435103	0.95%	32.67%
RC0239	tissue	1885	49.37%	2056240645	4164988252	99.21%	32162690	52021214	0.96%	18.53%
RC0240	plasma	1201	36.12%	1310930448	3629739330	99.70%	22207936	48055786	0.87%	62.61%
RC0241	plasma	905	33.55%	987033597	2942228520	99.71%	16728194	38961728	0.88%	66.93%
RC0242	tissue	1475	49.95%	1609396327	3222221172	99.47%	25106164	40081002	0.89%	35.02%
RC0243	plasma	1272	45.22%	291852943	645465100	99.80%	4957870	8514893	0.85%	69.45%
RC0244	tissue	3150	58.02%	722683801	1245608080	99.67%	11235597	15452612	0.91%	37.54%
RC0245	plasma	1498.31	40.71%	343748773	844307660	99.81%	5842763	11187382	0.88%	68.09%
RC0246	plasma	864.89	31.98%	943708701	2950866240	99.56%	15846416	38188882	0.94%	76.23%
RC0247	plasma	1363.11	35.49%	1487330246	4191243420	99.66%	25170740	55776033	0.94%	63.46%
RC0248	tissue	1334	49.06%	1455720668	2967174368	99.58%	22477966	36791333	0.98%	32.68%
RC0249	tissue	668	47.00%	728701481	1550263884	99.69%	11391216	19306183	0.85%	33.09%
RC0250	tissue	2944	50.06%	676026897	1350567500	99.63%	10650794	16708910	0.95%	24.28%
RC0251	tissue	985.1	48.91%	1074873505	2197486192	99.59%	16627622	27361972	0.99%	29.34%
RC0252	plasma	1274.48	33.32%	1390620374	4173626940	99.67%	23592369	55604681	0.93%	59.44%
RC0253	tissue	1440	48.93%	1571516781	3211842080	99.29%	24431223	39778589	0.88%	26.68%
RC0254	tissue	1776.78	46.12%	1938689653	4203894476	99.53%	30191688	52503329	0.97%	25.69%
RC0255	tissue	1415.38	121.12%	1544362009	1275068416	100.00%	16777216	16777216	1.50%	0.00%
RC0256	plasma	1447	40.81%	1578885796	3868753280	99.77%	26539931	51265523	0.86%	56.48%
RC0257	tissue	1379	48.41%	1504148207	3106968768	99.34%	23652233	38367736	1.21%	48.64%
RC0258	plasma	2669	40.45%	2912465484	7199304770	98.98%	48875019	96280661	0.99%	0.00%
RC0259	plasma	1119	29.07%	1221129329	4201042020	98.71%	20607161	55661294	1.05%	73.84%
RC0260	tissue	1185.75	101.47%	1293799917	1275068416	100.00%	16777216	16777216	1.20%	0.00%
RC0261	tissue	1386	48.20%	1512583325	3138354260	99.65%	23287963	38267218	0.87%	34.17%
RC0262	tissue	1253	48.74%	1367329069	2805331000	99.61%	21098414	34581857	0.83%	36.47%
RC0263	tissue	974	49.15%	1062958054	2162665044	99.36%	16468719	26441373	0.87%	42.65%
RC0264	tissue	858	43.42%	935646737	2154986612	99.37%	14702008	26748214	1.05%	29.96%
RC0265	plasma	2012	44.18%	461636334	1044892170	99.73%	7794026	13803967	0.92%	52.66%
RC0266	plasma	1192.55	34.77%	1301222771	3742264400	99.77%	21729935	49069551	0.86%	68.45%
RC0267	tissue	1293	58.05%	1842818205	3174604436	99.60%	28286758	40222066	0.91%	17.08%
RC0268	tissue	818	45.36%	892109815	1966831284	99.57%	13967093	24495373	0.92%	27.46%
RC0269	plasma	1419.43	36.70%	1548779289	4219721730	99.79%	26237839	56122992	0.87%	54.07%
RC0270	tissue	1892.55	52.01%	2065011737	3970442464	99.07%	31125838	48604261	0.95%	25.36%
RC0271	tissue	702	49.27%	160992263	326724228	99.79%	2559019	3992992	0.90%	26.37%
RC0272	plasma	956	33.37%	1042676833	3124156070	99.78%	17656884	41047766	0.83%	71.12%
RC0273	plasma	1845.16	48.29%	423325931	876665230	99.85%	7158072	11690002	0.86%	57.12%
RC0274	plasma	1416	35.08%	1545109720	4404839530	99.65%	26116974	58097473	0.97%	64.85%
RC0275	tissue	541	56.86%	771064181	1355967224	99.64%	11870107	17115191	0.86%	36.94%
RC0276	plasma	1298.18	37.56%	1416475079	3771350170	99.77%	23749144	49732306	0.87%	60.05%
RC0277	tissue	2121	49.08%	2314733753	4715891124	99.04%	35692805	58142261	1.02%	29.40%
RC0278	plasma	1016	36.59%	1109084746	3030970460	99.71%	18769341	39833269	0.90%	68.88%
RC0279	plasma	1848	41.89%	2016247593	4813107740	99.76%	33755398	64381577	0.92%	52.34%
RC0280	plasma	2462	46.61%	564841586	1211906010	99.75%	9559372	16225595	0.90%	56.99%
RC0281	plasma	1299	29.48%	1417514376	4808094340	99.69%	23660090	63942603	1.09%	41.07%
RC0282	plasma	1193	29.41%	1301735778	4425924720	99.72%	21991846	59030611	0.90%	57.92%
RC0283	tissue	1722	49.87%	1878970666	3768017680	99.53%	28975808	46667465	0.91%	31.67%
RC0284	tissue	707	51.10%	1007539111	1971581208	99.58%	15659609	24773727	0.86%	40.79%
RC0285	tissue	1107	36.13%	254094118	703331968	98.80%	3933922	8182486	0.91%	59.57%
RC0286	tissue	1704	51.27%	1859364031	3626904984	99.32%	28450347	44591096	0.90%	41.63%
RC0287	plasma	1206	38.16%	1315916780	3448535860	99.84%	22129989	45723952	0.84%	56.60%
RC0288	tissue	715	32.69%	779824251	2385407516	99.26%	12253265	29006653	0.91%	55.10%
RC0289	plasma	3000	46.59%	688849013	1478581720	99.01%	11610367	19831991	1.06%	46.75%
RC0290	tissue	954	44.20%	1040562602	2353978400	99.79%	16274370	29372237	0.93%	28.90%
RC0291	tissue	484	31.02%	527767592	1701363360	99.65%	8256380	21296413	0.96%	23.33%
RC0292	plasma	957	35.25%	1044717966	2963703400	99.64%	17651628	38695345	0.90%	73.69%
RC0293	plasma	1644	40.48%	1793858010	4431267120	99.79%	30152054	59357574	0.86%	49.94%
RC0294	tissue	1169	53.39%	1275821435	2389487348	99.34%	19688151	29696510	1.00%	26.74%
RC0295	plasma	1739	47.33%	398877356	842743300	99.73%	6725514	11135591	0.96%	58.66%
RC0296	tissue	800	45.29%	872656216	1926879604	99.66%	13673488	24064733	0.93%	26.07%
RC0297	plasma	3175	50.46%	729048950	1444930060	99.17%	12378122	19309955	0.97%	0.00%
RC0298	plasma	1765	35.64%	1926250722	5405429890	99.67%	32625825	72468954	0.91%	54.01%
RC0299	plasma	2309	41.86%	2518876297	6016871350	99.05%	42469302	80907577	1.02%	0.00%
RC0300	plasma	2328	42.59%	2540278200	5964700350	98.92%	42952877	80145151	1.23%	41.23%
RC0301	plasma	1602	40.42%	1748380424	4325928250	99.68%	29398065	57402359	0.89%	58.07%
RC0302	plasma	3129	41.49%	3414656992	8229653950	99.07%	57463150	110903837	1.00%	0.00%
RC0303	plasma	1911	40.17%	2084946509	5189736370	99.24%	35219713	69799746	1.01%	42.53%
RC0304	plasma	1466	35.41%	1599561822	4517690660	99.06%	27050668	60302962	1.07%	59.78%
RC0305	tissue	2361	56.13%	542021902	965664512	99.65%	8478375	12097486	0.90%	17.45%
RC0306	plasma	2176	41.92%	2373811248	5662979210	99.22%	39903722	76189260	0.96%	39.03%
RC0307	tissue	833	47.14%	909435931	1929076536	99.57%	14243034	23866609	0.98%	34.28%
RC0308	tissue	1103	52.67%	1203857605	2285532420	99.52%	18382110	28306834	1.08%	25.29%
RC0309	plasma	2927	41.91%	3194023171	7621756310	99.21%	53739928	102620073	1.00%	0.00%
RC0310	plasma	2006	32.48%	2189133406	6740630120	99.02%	37001270	90003000	1.35%	44.98%
RC0311	tissue	1597	47.80%	1743058433	3646931136	99.50%	27140653	45247391	0.91%	22.02%
RC0312	plasma	1847	36.47%	2015830595	5526773350	99.75%	33721416	73368947	0.89%	54.33%
RC0313	tissue	919	47.17%	1002605625	2125459700	99.26%	15702939	26341150	1.17%	27.34%
RC0314	pleural effusion	4133	48.86%	948231101	1940538110	99.32%	15837697	25741962	0.94%	0.00%
RC0315	tissue	1915	61.28%	439366297	716939236	99.10%	6651401	8755852	0.87%	40.07%
RC0316	tissue	918	56.62%	210791838	372289572	99.64%	3334058	4638298	0.93%	26.68%
RC0317	tissue	1874	46.88%	2045113877	4362069324	99.28%	31918953	54174943	0.97%	27.62%
RC0318	plasma	2401	48.51%	550768941	1135328880	99.78%	9291942	15309033	0.87%	55.42%
RC0319	plasma	3195	48.04%	733025132	1525894930	98.88%	12447225	20291126	1.01%	0.00%
RC0320	tissue	2005	46.28%	2188176774	4728254728	99.29%	34039841	58445169	0.91%	25.43%
RC0321	tissue	1754	54.60%	1913693610	3505087396	99.43%	28933560	43266809	0.96%	34.39%
RC0322	plasma	2588	38.12%	2824157710	7409218950	99.19%	47456995	99494236	0.95%	0.00%
RC0323	tissue	1301	45.02%	1419014593	3152309228	99.57%	22241177	39232174	0.93%	30.36%
RC0324	tissue	449	25.09%	490368949	1954706396	99.64%	7674148	24426434	0.92%	14.42%
RC0325	plasma	1625	40.98%	1773399121	4327390620	99.35%	29891164	58477980	0.93%	0.00%
RC0326	plasma	2173	41.90%	2370964379	5658571590	99.29%	40003021	76756662	0.94%	0.00%
RC0327	plasma	1737	37.76%	1894752114	5017657680	99.70%	32009324	67144804	0.86%	58.26%
RC0328	plasma	2808	42.67%	3063734826	7180846190	99.27%	51408794	96967814	1.01%	0.00%
RC0329	tissue	738	33.55%	805398191	2400631912	98.30%	11814749	27366280	1.00%	70.22%
RC0330	peritoneal effusion	3952	40.32%	906652935	2248542380	99.20%	15338859	30081612	1.01%	0.00%
RC0331	tissue	1362	51.02%	1485812921	2912238756	99.28%	23103598	36327011	0.94%	16.39%
RC0332	tissue	1949	46.42%	2126566892	4581622000	99.41%	33329428	56908665	1.02%	17.80%
RC0333	tissue	1579	46.85%	1722362128	3676075312	99.56%	26493557	45612953	0.92%	30.29%
RC0334	plasma	1639	37.04%	1788574196	4828512904	99.38%	30172747	64307246	1.19%	0.00%
RC0335	tissue	1720	52.19%	1876361517	3595086976	99.42%	29057069	44797054	0.90%	28.52%
RC0336	plasma	1870	42.31%	2040640077	4823362110	98.83%	34425654	65001056	1.07%	0.00%
RC0337	plasma	1510	43.26%	346395612	800707040	99.67%	5887741	10564835	0.92%	67.32%
RC0338	tissue	1680	45.32%	1833509777	4045429156	99.54%	28602146	50194447	0.89%	26.48%
RC0339	pericardial effusion	996	47.84%	228726774	478083016	99.72%	3606008	5914061	0.88%	19.31%
RC0340	plasma	1477	37.81%	1611869010	4263488180	99.28%	27251860	57451590	0.96%	60.94%
RC0341	plasma	3332	50.12%	764426819	1525145510	99.14%	12918206	20499718	0.96%	0.00%
RC0342	tissue	1439	48.87%	1570202470	3212738196	99.56%	24477026	40092576	0.90%	22.75%
RC0343	plasma	825	29.76%	900522583	3026254980	99.61%	15311180	39571501	0.91%	73.50%
RC0344	peritoneal effusion	2814	47.10%	3070449873	6518593130	99.25%	50707362	87652578	0.97%	0.00%
RC0345	tissue	1791	49.86%	1954255514	3919571408	99.55%	30132858	48674263	0.92%	29.95%
RC0346	plasma	1481	35.64%	1615456505	4532636080	99.04%	27498907	60690351	1.36%	50.96%
RC0347	plasma	1447	49.72%	2063052106	4149073460	99.81%	34284534	56836779	0.35%	65.07%
RC0348	plasma	2848	38.54%	3107922276	8063117160	99.21%	52090529	108403254	1.16%	11.28%
RC0349	plasma	2696	49.25%	618425982	1255576490	98.91%	10504966	16814153	0.97%	0.00%
RC0350	plasma	2886	52.05%	4113710541	7903682710	99.55%	68646954	108519150	0.67%	38.56%
RC0351	tissue	941	43.94%	1026641733	2336444288	99.50%	16125372	29092050	1.17%	18.08%
RC0352	tissue	2620	57.78%	601180810	1040437340	99.25%	9298138	12811788	0.90%	20.49%
RC0353	tissue	1840	50.43%	2007581557	3981046440	99.54%	31116475	49563880	0.94%	22.21%
RC0354	pleural effusion	2303	40.47%	2512681586	6208624520	99.15%	41690213	82770016	1.01%	44.47%
RC0355	plasma	2505	43.33%	2733588513	6309420110	99.19%	45745590	85232609	0.39%	0.00%
RC0356	tissue	1884	49.51%	2055591997	4152092572	99.51%	32065954	52001132	0.94%	15.71%
RC0357	tissue	1509	52.92%	1646415139	3111119432	99.57%	24965451	38394875	0.89%	28.42%
RC0358	plasma	3257	47.78%	3553368632	7437665900	99.13%	59610136	100502495	1.00%	0.00%
RC0359	pleural effusion	1616	36.01%	1762772713	4894844150	99.12%	29696649	65780827	1.03%	0.00%
RC0360	tissue	1614	52.00%	1760847617	3386164952	99.36%	27304950	42138593	1.06%	25.03%
RC0361	plasma	2028	40.62%	2213106167	5448093210	99.25%	37427774	73526056	0.95%	0.00%
RC0362	tissue	887	57.57%	203781232	353987024	99.74%	3147721	4398956	0.92%	15.14%
RC0363	plasma	1291	23.87%	1408668845	5900503910	98.58%	23899905	78121596	1.06%	0.00%
RC0364	tissue	1360	47.82%	1483413550	3102249548	99.55%	23078274	38562182	0.88%	30.55%
RC0365	tissue	2123	53.45%	487557227	912227544	99.65%	7654838	11429461	0.91%	14.78%
RC0366	tissue	675	35.32%	736613060	2085508172	99.64%	11580651	25302594	0.83%	72.98%
RC0367	tissue	758	40.85%	827344604	2025370816	99.60%	12959114	25090792	0.93%	30.03%
RC0368	tissue	1223	53.93%	1743305801	3232693060	99.66%	26893811	40988379	0.86%	26.52%
RC0369	pleural effusion	2823	40.39%	3080173016	7626864980	99.05%	51693196	102209941	1.04%	0.00%
RC0370	plasma	1522	56.03%	2169077671	3871577220	99.82%	35881481	53157483	0.34%	55.94%
RC0371	tissue	1087	42.96%	1186010569	2760415456	99.58%	18873116	34492425	0.93%	29.98%
RC0372	tissue	2568	53.86%	589065256	1093748756	99.57%	9192818	13299209	0.93%	33.02%
RC0373	tissue	1530	54.47%	2181417827	4004888172	99.57%	33729502	50411447	0.86%	29.69%
RC0374	plasma	2591	49.30%	594972691	1206856770	99.27%	10065702	15947554	0.73%	64.06%
RC0375	tissue	2264	54.91%	519782171	946620964	99.42%	8001739	11686270	0.94%	19.15%
RC0376	tissue	1473	45.38%	1607728924	3542635120	98.94%	25301617	44046362	0.90%	30.93%
RC0377	plasma	1370	43.48%	1494416675	3437320810	99.27%	25206011	46259340	1.05%	31.50%
RC0378	tissue	1719	45.86%	1875734273	4090539184	99.51%	29484034	50988219	1.09%	12.90%
RC0379	plasma	1558	35.89%	1700095985	4737570740	99.15%	28839792	63449036	1.34%	42.38%
RC0380	tissue	1070	46.33%	1167057359	2518900984	99.23%	18087474	31238676	1.18%	30.94%
RC0381	tissue	1654	47.14%	1804204197	3827334008	99.53%	27993383	47514161	0.91%	29.02%
RC0382	plasma	2922	55.19%	670955849	1215818520	99.12%	11344376	16369973	1.04%	45.83%
RC0383	tissue	1118	44.03%	1219767642	2770177352	99.60%	19229975	34631819	0.98%	25.29%
RC0384	tissue	1300	35.69%	1418780209	3975002464	99.54%	22162841	49607403	1.04%	22.16%
RC0386	tissue	1053	51.81%	1500615021	2896125996	99.57%	23324712	36577010	0.95%	41.39%
RC0387	tissue	874	46.39%	1245478745	2684743776	99.33%	18169779	30580309	0.94%	67.85%
RC0388	plasma	1748	52.51%	2492485690	4746987560	99.68%	41236448	65271864	0.22%	64.44%
RC0389	plasma	1021	47.92%	234507997	489411930	99.69%	3948436	6558424	0.23%	0.00%
RC0390	plasma	2520	55.12%	578531277	1049580630	99.61%	9718313	14104198	0.39%	63.54%
RC0391	tissue	699	44.75%	762307584	1703474640	99.68%	11938728	21236756	0.94%	31.62%
RC0392	tissue	1575	43.57%	1718398400	3944367320	99.46%	26993740	49375425	0.91%	22.29%
RC0393	plasma	1940	44.66%	2116649116	4739863520	99.40%	36097095	64176455	1.96%	37.84%
RC0394	tissue	1987	46.34%	2168221638	4678967436	99.51%	33913367	58458630	0.96%	26.75%
RC0395	tissue	2389	55.41%	548628536	990099120	99.66%	8650863	12359347	0.98%	18.74%
RC0396	tissue	2118	59.52%	486343549	817087324	99.65%	7658029	10258782	0.89%	25.82%
RC0397	tissue	1666	49.00%	2375081387	4846970224	99.74%	36651816	61135256	0.18%	25.24%
RC0398	tissue	1077	45.10%	1174674449	2604563396	99.58%	18423937	32519957	0.92%	23.48%
RC0399	tissue	1269	44.18%	1384126799	3132817356	99.55%	21778477	39224622	0.91%	19.11%
RC0400	tissue	2231	55.72%	512195905	919230792	99.61%	7998703	11361603	0.92%	28.87%
RC0401	tissue	1886	51.25%	2688666525	5246307664	99.55%	41723619	66373102	0.94%	21.69%
RC0402	plasma	1802	52.63%	2569425913	4881628150	99.52%	42425256	66902541	0.41%	56.07%
RC0403	plasma	1633	48.68%	2328675414	4783810290	99.37%	38640748	65381003	0.50%	63.82%
RC0404	plasma	1755	52.24%	2502337781	4790104410	99.30%	41595216	65342731	0.65%	61.67%
RC0405	plasma	915	30.21%	998302631	3304272230	98.62%	16918991	43883562	1.10%	76.37%
RC0406	tissue	1156	41.70%	1261141056	3024251964	99.50%	19927866	37628836	1.03%	41.55%
RC0407	plasma	1049	35.94%	1144583939	3184535760	99.33%	19361576	43115727	0.97%	51.37%
RC0408	plasma	1840	42.20%	2007377574	4757316970	99.07%	33889902	63768808	1.13%	50.39%
RC0409	tissue	1356	48.24%	1479786094	3067513596	99.32%	23132106	38318248	1.12%	18.26%
RC0410	plasma	1469	39.43%	1603083368	4065149340	98.67%	27177584	54071793	1.26%	66.13%
RC0411	tissue	808	57.59%	1151778852	1999984460	99.66%	17526770	24944267	0.99%	33.76%
RC0412	tissue	627	49.95%	894430355	1790490080	99.76%	13938723	22715218	0.86%	31.21%
RC0413	tissue	1467	52.90%	2092027166	3954548584	99.57%	32532273	50165137	0.89%	19.66%
RC0414	plasma	2353	51.89%	540180997	1040935210	99.58%	9085905	13983327	0.56%	61.53%
RC0415	tissue	979	47.41%	1067852756	2252359408	99.50%	16397273	27825895	0.98%	26.13%
RC0416	tissue	1028	53.39%	235948866	441924040	99.61%	3719606	5458663	1.01%	20.74%
RC0417	plasma	2508	49.98%	575905531	1152205040	99.24%	9752752	15401783	0.98%	35.03%
RC0418	plasma	1744	37.74%	1903151897	5043352790	97.94%	32432725	68078435	1.37%	56.70%
RC0419	tissue	1011	55.54%	232178837	418010184	99.66%	3636603	5185238	0.89%	20.88%
RC0420	tissue	999	50.94%	1423504154	2794315104	99.54%	22085126	35125157	0.94%	36.39%
RC0421	tissue	778	49.47%	1108692306	2240920420	99.79%	17276157	28362329	0.84%	36.99%
RC0422	tissue	2724	54.51%	625538894	1147636936	99.71%	9807863	14177747	0.88%	25.10%
RC0423	tissue	1141	45.91%	1244864368	2711643900	99.31%	19492400	33795228	1.23%	23.57%
RC0424	tissue	1286	52.04%	1403163657	2696059416	99.68%	21640141	33476472	0.96%	23.68%
RC0425	tissue	2308	54.52%	530054492	972291636	99.66%	8314593	12018256	0.90%	27.89%
RC0426	tissue	1567	55.44%	2234083868	4029588324	99.41%	34272821	50390900	0.96%	31.64%
RC0427	tissue	1279	48.92%	1822658770	3725459428	99.76%	28380539	47059270	0.84%	28.60%
RC0428	tissue	1577	51.68%	2248706227	4351489820	99.42%	34730564	54688077	0.95%	20.80%
RC0429	tissue	2162	57.98%	496410342	856213492	99.64%	7750947	10630504	0.88%	35.52%
RC0430	plasma	1577	48.56%	2247921214	4628748670	99.38%	37411018	63106850	0.53%	68.16%
RC0431	plasma	2165	53.61%	3085787941	5755688960	99.14%	51072822	78897025	0.38%	59.74%
RC0432	tissue	532	56.15%	758518108	1350944004	96.42%	11737467	17064247	0.88%	40.32%
RC0433	plasma	909	46.48%	1296222629	2789020920	99.54%	21618331	38118267	0.39%	71.68%
RC0434	plasma	1912	36.50%	2085980347	5715449530	99.23%	35639567	77161319	1.97%	37.37%
RC0435	plasma	1317	48.21%	1876817168	3893166830	99.48%	31171325	52936717	0.49%	65.20%
RC0436	plasma	969	43.18%	1381185513	3198647270	99.66%	23031675	43573106	0.40%	75.37%
RC0437	plasma	2980	55.90%	4247830053	7598804010	99.33%	70391489	104856191	0.47%	36.32%
RC0438	plasma	1390	49.94%	1981033924	3966552590	98.78%	32996565	54270982	0.45%	61.38%
RC0439	tissue	1262	57.59%	1798803005	3123265296	99.84%	27501633	39027304	0.82%	44.90%
RC0440	plasma	2611	56.77%	599633101	1056220830	99.44%	10024860	13964307	0.74%	57.41%
RC0441	plasma	2130	51.41%	3036000546	5904894940	99.34%	50432845	80464355	0.72%	53.25%
RC0442	plasma	1920	50.03%	2737294438	5471104450	99.48%	45464746	74906465	0.51%	59.04%
RC0443	plasma	1356	51.13%	1933061655	3780896210	99.71%	32153126	51857461	0.39%	62.57%
RC0444	tissue	1433	60.31%	328964483	545458688	99.67%	5121214	6714038	0.85%	38.88%
RC0445	tissue	1976	55.63%	453705612	815627972	99.65%	7143191	10246242	0.95%	23.77%
RC0446	tissue	2033	53.97%	466771994	864796324	99.55%	7355753	10739610	0.90%	24.92%
RC0447	plasma	929	44.44%	1324060021	2979250610	99.53%	22117553	40597443	0.47%	77.59%
RC0448	tissue	1416	49.73%	2018826335	4059871892	98.77%	31300584	51029589	0.93%	34.31%
RC0449	plasma	1783	49.88%	2541788860	5095546050	99.44%	42263828	69678701	0.46%	62.01%
RC0450	tissue	1396	57.28%	1990228227	3474828376	99.45%	30597749	43647573	1.07%	35.29%
RC0451	tissue	790	49.38%	1125910076	2280199728	98.32%	16695520	27172938	0.85%	72.90%
RC0452	plasma	1763	54.38%	2513269932	4621766940	99.44%	41759539	63460237	0.41%	59.11%
RC0453	pleural effusion	1342	40.82%	1912616049	4685818830	99.23%	31873102	63674404	0.57%	52.11%
RC0454	tissue	1344	53.45%	1915793886	3584318384	99.52%	29574323	45293713	0.95%	20.90%
RC0455	plasma	2325	53.37%	533766657	1000034350	99.58%	8985785	13431269	0.46%	63.15%
RC0456	plasma	940	42.06%	215759738	513002770	98.93%	3675600	6733366	0.93%	85.76%
RC0457	tissue	1105	54.49%	253765981	465672292	99.70%	4003788	5850377	0.89%	23.40%
RC0458	plasma	1424	46.71%	2030392507	4346628650	99.64%	33715991	59458982	0.38%	56.68%
RC0459	tissue	1033	51.10%	237244548	464266748	99.61%	3756000	5790689	0.92%	23.21%
RC0460	tissue	1143	52.74%	1629037823	3088594020	99.60%	25290347	38969098	0.91%	36.62%
RC0461	tissue	1309	56.47%	300469177	532076380	99.65%	4690465	6526147	0.89%	41.00%
RC0462	tissue	889	54.50%	1267108543	2324849348	99.47%	19662767	29438267	0.90%	28.44%
RC0463	plasma	1085	41.40%	249235346	602075600	99.25%	4221668	7956318	0.53%	79.89%
RC0464	tissue	1445	53.59%	2059975611	3843836192	99.62%	32027065	48564380	0.93%	31.64%
RC0465	tissue	1118	55.96%	1593198967	2846927548	99.61%	24531397	35747250	0.88%	41.50%
RC0466	plasma	1961	52.12%	2795472996	5363173690	99.64%	46474111	73532967	0.46%	55.73%
RC0467	plasma	1555	56.00%	2217092063	3958851260	99.76%	36708688	54422603	0.33%	53.80%
RC0468	tissue	1490	53.36%	2124586175	3981336684	99.71%	32873056	50378162	0.86%	22.82%
RC0469	tissue	1969	66.41%	452117551	680800096	99.55%	6827362	8430399	0.91%	44.35%
RC0470	tissue	433	34.76%	616908843	1774614060	99.30%	9260073	19420462	0.79%	82.96%
RC0471	tissue	1129	49.93%	1609791088	3224028832	99.42%	24302821	38923571	0.86%	57.96%
RC0472	plasma	2045	54.95%	2916028912	5306752780	99.54%	48448855	72930223	0.33%	62.89%
RC0473	plasma	1110	48.72%	1582624555	3248663880	99.35%	26287065	44363348	0.51%	68.23%
RC0474	plasma	1615	54.81%	2302963547	4201460900	99.73%	38150668	57743608	0.23%	66.38%
RC0475	tissue	1371	55.63%	1954291313	3513098024	99.37%	30221192	44485524	1.12%	19.69%
RC0476	tissue	1837	59.28%	421818259	711590736	99.58%	6574814	8794909	0.99%	25.43%
RC0477	tissue	618	38.06%	880956413	2314927776	99.60%	13579818	28468582	0.78%	73.63%
RC0478	plasma	1932	48.29%	2753572858	5701761100	99.48%	45761485	77619940	0.36%	60.69%
RC0479	plasma	3414	52.79%	4866380570	9217710124	99.72%	62463411	94734976	0.26%	54.52%
RC0480	tissue	1001	50.68%	1426527672	2814511344	99.62%	21903422	35470666	0.18%	20.67%
RC0481	plasma	3919	36.50%	4275969999	11714033520	98.94%	72070255	157143362	1.02%	0.00%
RC0482	tissue	969	46.27%	1057711917	2285902388	99.48%	16517408	28184733	0.96%	35.32%
RC0483	plasma	2245	41.04%	2449717755	5969342050	99.15%	41397573	80520888	1.03%	0.00%
RC0484	plasma	2110	41.91%	2302291500	5492910990	98.97%	38725414	73545355	1.04%	0.00%
RC0485	tissue	1017	55.00%	1110138821	2018578164	99.53%	17152396	25189845	1.06%	26.47%
RC0486	plasma	1395	35.10%	1521997168	4336095960	98.97%	25750133	57893765	1.16%	59.69%
RC0487	tissue	810	46.66%	883430922	1893434816	99.55%	13783927	23557653	0.93%	26.74%
RC0488	plasma	3063	48.10%	3341585688	6947430840	99.66%	55627840	94237429	0.40%	36.16%
RC0489	tissue	1143	39.30%	1246817587	3172907052	99.43%	19151862	38546917	0.86%	43.02%
RC0490	plasma	2361	43.06%	2576403913	5983896800	99.37%	43011125	80352987	0.44%	44.20%
RC0491	tissue	1438	52.27%	1569232861	3002186732	99.38%	23724972	36406402	0.95%	45.33%
RC0492	tissue	673	52.82%	958764027	1815303396	99.60%	14859008	22827613	0.92%	28.44%
RC0493	plasma	1716	51.01%	2446464844	4796114540	99.48%	40605589	65604632	0.43%	59.70%
RC0494	tissue	921	49.81%	1313385566	2636572392	99.70%	20541234	33533567	0.88%	30.84%
RC0495	tissue	966	55.07%	1377775094	2501822112	99.75%	21279006	31599986	0.99%	30.17%
RC0496	tissue	782	50.56%	1114372578	2204097280	99.78%	17179241	27952907	0.17%	34.62%
RC0497	plasma	1461	53.02%	2083438384	3929477230	99.71%	34195598	53759037	0.17%	0.00%
RC0498	tissue	889	56.15%	1267105791	2256602108	99.62%	19186401	28149316	0.17%	48.08%
RC0499	tissue	1124	48.15%	1602453062	3328281224	99.28%	24409104	40615828	0.18%	43.73%
RC0500	plasma	1735	54.16%	2473731351	4567141110	99.57%	41037311	62628373	0.41%	61.62%
RC0501	tissue	1530	58.46%	351294528	600958372	99.56%	5458150	7420663	0.89%	24.70%
RC0502	plasma	1707	53.45%	392053853	733544560	99.32%	6600526	9774704	0.51%	72.32%
RC0503	plasma	1699	54.72%	2421968794	4426471560	99.74%	40187720	60778534	0.37%	68.93%
RC0504	tissue	1774	50.26%	2529211210	5032450352	99.71%	39108657	63508082	0.23%	24.52%
RC0505	plasma	2094	48.76%	2985254093	6122482450	99.63%	49627100	83561952	0.29%	68.91%
RC0506	plasma	3550	54.75%	815194989	1488811170	99.57%	13682351	19952703	0.48%	46.46%
RC0507	tissue	1762	53.17%	2512278057	4725433684	99.60%	38851097	59320680	0.88%	38.45%
RC0508	tissue	645	58.40%	919947723	1575340464	99.53%	14122295	19818229	0.86%	32.70%
RC0509	plasma	1991	53.04%	457112987	861753830	99.72%	7682920	11668210	0.27%	58.43%
RC0510	tissue	1612	55.65%	2297553688	4128605836	99.77%	35499080	52248363	0.85%	31.78%
RC0511	plasma	2521	46.86%	3594134860	7670345970	99.60%	59826447	104919445	0.28%	0.00%
RC0512	plasma	1499	51.41%	2136655058	4156001920	99.48%	35573257	56834850	0.49%	67.37%
RC0513	peritoneal effusion	856	39.12%	1220913025	3120571580	99.11%	20269654	41992901	0.52%	80.19%
RC0514	tissue	921	56.57%	1313403138	2321862548	99.76%	20206681	29202511	0.84%	36.16%
RC0515	plasma	1751	52.94%	2496177819	4715413150	99.41%	41393270	64857739	0.37%	61.35%
RC0516	plasma	2205	56.39%	3142981184	5573613920	99.72%	51935177	77050840	0.17%	60.98%
RC0517	tissue	1329	53.27%	1894982632	3557595112	99.36%	29148572	45060359	0.20%	38.67%
RC0518	tissue	1131	52.99%	1612196682	3042333960	99.72%	24960982	38178746	0.83%	40.93%
RC0519	peritoneal effusion	561	30.56%	800400636	2619508430	97.43%	13376126	35211906	0.63%	85.35%
RC0520	plasma	2336	53.44%	3330534154	6232492140	99.69%	54968221	85635800	0.24%	40.53%
RC0521	plasma	1556	48.94%	2217588300	4530805650	99.61%	36830924	61916306	0.25%	74.68%
RC0522	tissue	1123	57.41%	1600550673	2787948204	99.67%	24459654	34830707	0.20%	47.71%
RC0523	plasma	1453	50.61%	2071943453	4093923890	99.56%	34355085	55971021	0.46%	61.36%
RC0524	tissue	1141	55.27%	1626165665	2942067464	99.76%	24899831	37071849	0.17%	34.73%
RC0525	plasma	2308	53.36%	3290267648	6166352570	99.61%	54727429	84837684	0.38%	61.14%
RC0526	tissue	1134	55.94%	1617285497	2890872040	98.59%	25104798	36602840	0.97%	29.44%
RC0527	tissue	1967	53.81%	2804344935	5211150596	99.57%	43265021	65516083	0.87%	36.30%
RC0528	tissue	1375	59.02%	1959498595	3319828428	99.68%	30008113	42079648	0.26%	29.46%
RC0529	tissue	901	52.21%	1284602765	2460328696	99.66%	20031712	31224872	0.85%	36.72%
RC0530	tissue	1098	52.67%	1565663314	2972772528	99.67%	24374007	37849814	1.05%	21.01%
RC0531	tissue	1619	53.25%	2308305632	4335079672	99.47%	35766855	54752151	0.91%	19.81%
RC0532	tissue	1210	55.65%	1724965586	3099574424	99.37%	26643666	39264487	0.90%	28.53%
RC0533	tissue	1261	56.50%	1796950449	3180479084	99.66%	27507225	40180948	0.21%	30.34%
RC0534	tissue	923	52.96%	1315223916	2483241860	99.48%	20234430	31209853	0.85%	26.82%
RC0535	plasma	2084	51.73%	2971252222	5744255580	99.57%	49399151	78676866	0.46%	56.40%
RC0536	tissue	1065	57.87%	1517996746	2623179824	99.81%	23401996	33280071	0.84%	39.94%
RC0537	plasma	2903	52.35%	666592201	1273421520	99.05%	11240985	17187906	0.43%	48.08%
RC0538	plasma	698	39.42%	994937152	2523897180	99.26%	16677018	34153186	0.59%	83.83%
RC0539	plasma	1474	52.06%	2101750268	4036783450	99.74%	34909797	55426393	0.23%	63.42%
RC0540	tissue	974	57.44%	1388135937	2416653244	99.49%	20899683	30069235	0.20%	33.36%
RC0541	tissue	863	56.67%	1230584652	2171511596	99.80%	18978879	27367842	0.84%	23.20%
RC0542	plasma	2898	57.49%	4510426701	7845065820	99.88%	48066361	85067802	0.38%	39.21%
RC0543	plasma	1593	76.20%	2271564515	2981142226	99.67%	29773681	31566641	0.32%	69.13%
RC0544	tissue	2424	49.72%	556617534	1119489100	99.74%	6900815	10623936	0.35%	30.12%
RC0545	tissue	2053	56.15%	2926373961	5211636800	99.59%	34965136	49942573	0.36%	34.02%
RC0546	tissue	1005	52.51%	1433368615	2729961952	99.60%	22268495	34541455	0.95%	30.37%
RC0547	tissue	759	51.80%	1081821079	2088272064	98.26%	15854411	24575230	0.28%	46.71%
RC0548	tissue	1373	52.82%	1957756658	3706229452	99.58%	29975278	46493290	0.19%	34.52%
RC0549	plasma	1979	54.24%	2820518185	5200472130	99.48%	46764118	71301805	0.45%	58.32%
RC0550	peritoneal effusion	2591	49.54%	3693077292	7454453510	99.33%	61451809	102363692	0.44%	36.96%
RC0551	plasma	2235	54.38%	3185933340	5858641880	99.47%	52795618	80572045	0.39%	58.53%
RC0552	tissue	1404	55.76%	322455051	578342672	99.45%	4862000	6913162	0.22%	67.53%
RC0553	plasma	2139	53.83%	3048994315	5664478750	99.62%	50579449	77704531	0.44%	55.22%
RC0554	plasma	2078	55.42%	2962686400	5345675370	99.63%	48683471	73088584	0.44%	55.11%
RC0555	tissue	1318	57.97%	1879020692	3241518636	99.41%	28702756	40503616	0.89%	40.28%
RC0556	plasma	1387	48.48%	1977572801	4079050710	98.76%	33044395	55848783	0.45%	67.34%
RC0557	plasma	1350	50.07%	1924201799	3842896680	99.60%	31973533	52557691	0.27%	74.86%
RC0558	plasma	2297	53.70%	3274804235	6098416380	99.67%	54148542	83753174	0.22%	62.81%
RC0559	plasma	1026	52.33%	1461992212	2793528290	99.72%	24136509	38295504	0.17%	74.57%
RC0560	plasma	1507	50.75%	2148822359	4234102600	99.60%	35698040	58120363	0.36%	60.23%
RC0561	plasma	1542	51.31%	2198113826	4284054880	99.70%	36471359	58144239	0.36%	58.83%
RC0562	plasma	1174	44.27%	1674123040	3781206100	99.66%	27890832	51496449	0.23%	70.31%
RC0563	tissue	987	50.58%	226553219	447880008	99.45%	3544873	5528936	0.86%	62.17%
RC0564	tissue	1209	50.26%	1723438391	3429063608	99.26%	26569311	41804341	0.82%	55.03%
RC0565	tissue	272	45.52%	388199599	852876180	98.60%	5875554	10223405	0.23%	72.17%
RC0566	plasma	1629	52.89%	2322362249	4390546650	99.55%	38613233	60246286	0.44%	55.81%
RC0567	tissue	1035	52.36%	1474903741	2816858376	99.67%	22774294	35623437	0.23%	37.76%
RC0568	tissue	826	52.18%	1178073290	2257841820	99.02%	17924985	27888398	0.27%	46.99%
RC0569	plasma	3293	53.59%	756203933	1411096540	99.82%	12688227	18893796	0.20%	58.16%
RC0570	tissue	1298	54.51%	1850985531	3395715264	99.64%	28805295	43286197	0.96%	10.58%
RC0571	tissue	1196	53.88%	1704390160	3163411000	99.61%	20914409	30728641	0.39%	17.13%
RC0572	plasma	3484	61.51%	5394633981	8770229640	99.82%	57439813	95473555	0.37%	35.54%
RC0573	tissue	980	55.32%	1524851550	2756420136	99.78%	19648306	35299343	0.37%	8.83%
RC0574	plasma	1650	53.72%	2352623586	4379330900	99.80%	38890494	60177734	0.17%	67.12%
RC0575	tissue	760	58.75%	1083557320	1844443620	99.48%	16314036	23037197	0.24%	25.70%
RC0576	plasma	1419	53.46%	2023058854	3784319980	99.73%	33533005	51804409	0.22%	67.17%
RC0577	tissue	719	50.83%	1025594962	2017536812	98.93%	15918451	25089901	1.08%	43.36%
RC0578	tissue	1234	46.23%	1759728207	3806126208	99.18%	27090869	46652050	0.83%	52.37%
RC0579	tissue	992	52.37%	1413886396	2699554960	99.42%	21528917	33706083	0.21%	30.76%
RC0580	plasma	1315	42.34%	1874308310	4427270400	99.56%	31265467	60259634	0.32%	75.22%
RC0581	tissue	758	54.59%	1080613602	1979660616	99.74%	16663179	25070074	0.20%	32.76%
RC0582	plasma	1133	46.29%	1614953361	3488957570	99.62%	26812525	47625198	0.21%	0.00%
RC0583	plasma	1918	49.18%	2733984955	5559038590	99.76%	45363164	76027332	0.22%	51.33%
RC0584	tissue	290	50.13%	412751885	823281172	98.92%	5983055	9564575	0.35%	69.06%
RC0585	tissue	886	49.34%	1262980182	2559988712	99.01%	19419739	31435662	1.15%	23.76%
RC0586	tissue	359	37.91%	511810588	1349935332	98.77%	7668207	15485577	0.87%	76.63%
RC0587	plasma	1367	48.11%	1949165608	4051431510	99.37%	32575495	55224095	0.65%	67.98%
RC0588	tissue	1340	53.06%	1909885464	3599250864	99.28%	29160983	44798513	0.16%	38.94%
RC0589	plasma	1338	52.97%	1906877389	3599926330	99.68%	31496228	49358600	0.20%	0.00%
RC0590	tissue	1145	53.33%	1632735995	3061831532	99.61%	24990792	38517238	0.19%	36.12%
RC0591	tissue	485	62.48%	690972332	1105947668	99.63%	10358284	13894439	0.91%	13.54%
RC0592	tissue	226	47.22%	322095985	682091336	98.94%	4814602	8121871	0.91%	56.21%
RC0593	tissue	1309	54.80%	1866414678	3405802896	99.67%	28411812	42677858	0.17%	35.34%
RC0594	plasma	1697	50.89%	2419272342	4753557970	99.80%	40086665	65260486	0.19%	57.98%
RC0595	plasma	2715	47.05%	3869982192	8224881980	99.73%	64338943	112924518	0.19%	60.81%
RC0596	plasma	2665	66.53%	4147778203	6234509190	99.76%	57471249	86537434	0.23%	50.00%
RC0597	plasma	2152	58.31%	3349679789	5744385850	99.49%	47287425	79499848	0.37%	51.60%
RC0598	plasma	2154	43.23%	3071303518	7104154770	99.80%	32762850	75810887	0.38%	0.659
RC0599	tissue	1177	55.15%	270249851	489986440	99.36%	4229279	6138401	0.84%	19.99%
RC0600	tissue	222	54.99%	51045775	92829730	99.63%	848735	1241248	0.58%	0.00%
RC0601	plasma	1456	49.12%	2074948792	4224280970	99.72%	34430987	57806518	0.17%	0.00%
RC0602	plasma	3781	52.04%	868200690	1668194360	99.85%	14529408	22773035	0.19%	46.47%
RC0603	tissue	810	52.66%	1154619221	2192764540	99.68%	17698322	27620132	0.23%	20.90%
RC0604	tissue	501	42.46%	714000840	1681696232	98.91%	10851006	20086912	0.26%	47.47%
RC0605	peritoneal effusion	1370	46.77%	1952562061	4174729440	99.49%	32269386	56802451	0.26%	0.00%
RC0606	plasma	1653	51.52%	2356250671	4573545620	99.77%	38990533	62620926	0.19%	57.42%
RC0607	plasma	3035	59.99%	4326408696	7211585990	99.55%	72234357	99258942	0.54%	44.53%
RC0608	tissue	1222	53.33%	1741806868	3266160040	99.62%	26827047	41071261	0.83%	22.57%
RC0609	tissue	775	46.47%	1104380988	2376439440	98.97%	16294625	26968928	0.85%	69.34%
RC0610	plasma	1622	48.13%	2312826148	4805488660	99.71%	38417762	65803417	0.22%	0.00%
RC0611	tissue	702	52.22%	1001419978	1917520508	99.69%	15341226	24267555	0.20%	29.39%
RC0612	tissue	1403	55.02%	1999783548	3634495256	99.32%	30728451	45310934	0.82%	41.04%
RC0613	tissue	1893	54.11%	2698488059	4987410000	99.69%	32776320	48302459	0.37%	23.57%
RC0614	tissue	1980	52.19%	2823027989	5409209028	99.50%	43263003	67638850	0.89%	27.61%
RC0615	plasma	1282	52.36%	1828258267	3491837510	99.62%	30322845	47953105	0.20%	0.00%
RC0616	plasma	1719	51.44%	2451133528	4765355350	99.76%	40312977	64741830	0.20%	53.93%
RC0617	pleural effusion	2804	39.62%	643856448	1625243410	99.76%	10817297	21816108	0.26%	0.00%
RC0618	tissue	1195	54.15%	1850580030	3417535628	99.46%	18953233	35410848	0.38%	11.30%
RC0619	tissue	1259	59.99%	1950365493	3251382220	99.56%	24810765	40950835	0.27%	26.14%
RC0620	plasma	2752	61.25%	4262365755	6959497458	99.78%	43593409	72230217	0.18%	51.10%
RC0621	tissue	1100	57.27%	1702974485	2973729762	99.67%	17325301	30852732	0.48%	19.67%
RC0622	tissue	969	46.94%	1381754778	2943867752	98.53%	20918975	34853024	0.93%	47.53%
RC0623	tissue	1420	53.22%	2024253966	3803808816	99.39%	30804675	47388511	0.23%	47.87%
RC0624	plasma	1373	56.29%	1957138553	3476953480	99.77%	32238837	47794073	0.17%	0.00%
RC0625	tissue	884	53.37%	1260345709	2361493204	99.53%	19535253	29630804	1.27%	35.91%
RC0626	plasma	3265	59.98%	5055533324	8429283630	99.81%	53816545	91361377	0.41%	49.21%
RC0627	plasma	1195	52.14%	1702871644	3266066440	99.67%	28235731	44873504	0.18%	0.00%
RC0628	plasma	2009	51.47%	2863770987	5564349552	99.68%	37141833	57152900	0.31%	66.80%
RC0629	tissue	1658	58.38%	380761768	652164816	98.85%	5751078	7939704	0.21%	40.89%
RC0630	tissue	703	48.82%	1002142362	2052824372	99.35%	15446858	25337965	0.95%	35.84%
RC0631	tissue	2694	49.78%	618491811	1242329200	99.74%	7730567	11692128	0.38%	23.64%
RC0632	tissue	1029	54.64%	1466808236	2684722420	99.62%	22451102	33733073	0.23%	23.15%
RC0633	tissue	1313	58.99%	1872023348	3173359500	99.58%	17692901	30701978	0.37%	16.28%
RC0634	plasma	1345	45.95%	308819955	672061810	99.50%	5213003	8835095	0.51%	0.00%
RC0635	peritoneal effusion	1167	33.51%	1664073087	4966621800	99.55%	27602622	62877096	0.22%	0.00%
RC0636	tissue	1127	50.35%	1606153190	3189662468	99.48%	24823526	40108464	0.98%	29.39%
RC0637	tissue	924	51.48%	1317119246	2558596924	99.51%	20163923	31912156	0.18%	35.36%
RC0638	tissue	899	51.26%	1282312378	2501660308	99.59%	19867316	31578697	0.97%	28.46%
RC0639	tissue	751	39.46%	1070645608	2712995560	99.43%	16698604	33635088	0.80%	27.13%
RC0640	plasma	1626	53.23%	2318398007	4355680000	99.51%	38394007	59514551	0.45%	65.17%
RC0641	plasma	1599	55.03%	2279979924	4142802580	99.70%	37515409	57004097	0.21%	64.08%
RC0642	tissue	901	51.93%	1285014512	2474662700	99.75%	15788242	24039036	0.38%	31.01%
RC0643	plasma	2081	50.67%	2966462411	5854423260	99.80%	49126055	79946267	0.18%	43.83%
RC0644	tissue	1278	55.21%	1821608371	3299715560	99.65%	27885826	41609207	0.23%	20.93%
RC0645	tissue	1004	55.35%	1431402188	2585862532	99.79%	21873784	32705550	0.21%	20.73%
RC0646	tissue	1414	54.28%	2016314289	3714486624	99.70%	30815147	46730007	0.19%	35.34%
RC0647	plasma	2311	46.97%	3294883816	7015027670	99.72%	54912959	95856129	0.21%	62.53%
RC0648	tissue	1640	51.99%	376606638	724356076	99.69%	5854196	8865348	0.17%	56.27%
RC0649	plasma	875	51.40%	1247868139	2427750010	99.59%	20654436	32850866	0.21%	0.00%
RC0650	plasma	1650	50.36%	2351577982	4669504000	99.71%	38776170	63915385	0.18%	0.00%
RC0651	pleural effusion	3072	39.66%	4380012382	11045024550	99.74%	73089888	151331562	0.24%	40.29%
RC0652	plasma	1482	48.33%	2112535215	4370909480	99.66%	35076711	59895576	0.22%	63.97%
RC0653	plasma	2096	49.60%	481362175	970536840	99.79%	8075808	12861535	0.20%	0.00%
RC0654	pleural effusion	2176	40.69%	3102521896	7624588720	99.61%	51562153	104592448	0.26%	0.00%
RC0655	plasma	971	27.18%	1383918391	5092416560	99.44%	23202693	68978675	0.34%	71.26%
RC0656	plasma	3984	53.76%	914879957	1701649852	99.71%	12061770	17122242	0.37%	53.94%
RC0657	plasma	2809	78.46%	4003758124	5103238004	99.80%	51689076	54095902	0.28%	41.50%
RC0658	plasma	2100	51.67%	2994253522	5794736150	99.68%	49583820	79586727	0.21%	68.56%
RC0659	plasma	1759	53.89%	2508017353	4654329960	99.73%	41515180	64071445	0.24%	54.63%
RC0660	tissue	1155	51.54%	1646778198	3195015908	99.72%	25210189	40142535	0.17%	50.03%
RC0661	tissue	717	54.10%	164640732	304340860	99.50%	2595525	3801272	0.90%	26.65%
RC0662	tissue	120	50.70%	171379081	337994370	99.62%	2826598	4621835	0.16%	0.00%
RC0663	tissue	776	49.79%	1106570075	2222503568	99.42%	17056381	27798616	0.25%	28.51%
RC0664	tissue	780	49.29%	1112195645	2256405800	99.51%	17151689	28353675	0.21%	42.39%
RC0665	tissue	1316	54.18%	1876204500	3463011744	99.68%	28635025	43270253	0.86%	32.36%
RC0666	plasma	2512	46.78%	576678009	1232830060	99.84%	9653520	15420684	0.17%	48.10%
RC0667	plasma	2336	45.12%	536369406	1188653760	99.84%	9033377	15884933	0.18%	52.93%
RC0668	tissue	1732	49.31%	2468934769	5006571972	99.60%	38065026	62768786	0.22%	30.94%
RC0669	tissue	740	50.00%	1055129837	2110422492	99.54%	16225995	26423904	0.20%	39.80%
RC0670	tissue	1313	53.53%	1871968161	3496727092	99.65%	28657144	43904468	0.22%	29.17%
RC0671	tissue	1611	55.82%	2295948676	4113135300	99.54%	27724077	39706024	0.40%	17.76%
RC0672	tissue	1807	56.21%	2575915546	4582418500	99.61%	24415097	44470111	0.39%	22.07%
RC0673	tissue	1538	55.34%	2192840978	3962722004	99.65%	33592569	50270912	0.28%	18.36%
RC0674	tissue	708	51.54%	1008612957	1957137788	99.75%	15570505	24696740	0.18%	43.11%
RC0675	tissue	1260	55.62%	1796167548	3229582228	99.72%	27408338	40584068	0.21%	29.54%
RC0676	tissue	1784	64.08%	2762830319	4311707714	99.69%	27534503	44538016	0.33%	27.28%
RC0677	plasma	2177	50.52%	3104094164	6143915764	99.74%	40119892	63098071	0.29%	49.78%
RC0678	plasma	1694	38.38%	388927140	1013259870	99.58%	6571830	13406051	0.49%	57.75%
RC0679	plasma	1283	52.59%	1828923517	3477843530	99.72%	30227628	47700898	0.17%	0.00%
RC0680	tissue	914	52.53%	1303191687	2480666828	99.68%	20096672	31389792	0.18%	26.22%
RC0681	plasma	6477	55.09%	9233853623	16760837170	99.78%	152537365	230578080	0.22%	46.73%
RC0682	tissue	554	49.27%	789842533	1603221748	99.74%	12224757	20262236	0.18%	42.72%
RC0683	tissue	871	54.48%	1241030550	2277787868	99.56%	18829565	28381561	0.22%	33.21%
RC0684	tissue	1294	57.12%	297092691	520129712	99.68%	4533206	6333233	0.18%	43.75%
RC0685	plasma	3326	51.56%	4742063679	9197108340	99.76%	78660081	126538077	0.27%	39.97%
RC0686	tissue	1778	39.55%	408354809	1032518672	99.76%	6397602	12871032	0.22%	21.73%
RC0687	plasma	2576	56.02%	3671641499	6553924650	99.62%	60856828	90202429	0.51%	35.62%
RC0688	tissue	1739	74.58%	399184672	535260552	99.90%	6244028	7015872	0.20%	22.58%
RC0689	plasma	1996	46.13%	2845457333	6168973020	99.69%	47303454	84720683	0.26%	52.18%
RC0690	tissue	877	51.64%	1249554298	2419853376	99.74%	19255728	30454541	0.14%	54.19%
RC0691	plasma	1314	49.93%	1873172536	3751232940	99.62%	31007155	51309979	0.23%	0.00%
RC0692	plasma	952	46.73%	1357453996	2904816950	99.67%	22558162	39307063	0.20%	74.53%
RC0693	plasma	1895	53.35%	2700961848	5062303680	99.43%	45002596	69304828	0.47%	0.00%
RC0694	plasma	2604	54.43%	3712841684	6821548090	99.70%	61655039	93822408	0.39%	38.99%
RC0695	tissue	1146	63.14%	1784147281	2825907900	99.43%	17679892	29035369	0.33%	47.09%
RC0696	tissue	1115	61.57%	1590160753	2582891100	99.64%	14784660	24915461	0.35%	34.59%
RC0697	tissue	1775	57.87%	2530135384	4372119800	99.33%	30205179	41826056	0.42%	26.22%
RC0698	tissue	610	85.18%	868897871	1020066100	99.77%	10101332	10140520	0.41%	28.20%
RC0699	tissue	1091	56.58%	1555511335	2749210168	99.70%	23517136	34564417	0.22%	28.47%
RC0700	plasma	2369	61.94%	3688194786	5954934720	99.44%	51516190	82375913	0.67%	44.70%
RC0701	tissue	1246	53.16%	1775582150	3340312632	99.70%	27258756	42313674	0.21%	28.11%
RC0702	tissue	644	48.48%	918474112	1894487600	99.06%	11286022	18122538	0.46%	15.31%
RC0703	tissue	1254	51.44%	1788167031	3476263408	99.72%	22982694	44326805	0.26%	15.78%
RC0704	tissue	1336	52.80%	1904506626	3606873892	99.71%	29250536	45634731	0.23%	24.57%
RC0705	tissue	1667	49.76%	2376934487	4776785900	99.60%	28916788	45959036	0.34%	25.88%
RC0706	tissue	990	41.07%	1411754617	3437277612	99.55%	21967376	41634233	0.88%	17.34%
RC0707	plasma	1309	56.97%	300601284	527688420	99.84%	5026756	7169818	0.31%	11.13%
RC0708	plasma	1949	51.76%	2778722481	5368976060	99.71%	45980565	73608583	0.20%	62.40%
RC0709	plasma	1291	50.15%	1840690607	3670367960	99.58%	30487612	50072539	0.21%	73.22%
RC0710	plasma	2434	55.28%	3470159449	6276967760	99.82%	57491265	86270258	0.17%	52.80%
RC0711	tissue	533	49.28%	760308613	1542757896	99.36%	11169586	17425231	0.87%	59.38%
RC0712	tissue	800	49.60%	1140368664	2299244600	99.64%	14078888	22319443	0.38%	20.29%
RC0713	tissue	349	50.18%	497529868	991501700	99.68%	7712036	12590442	0.28%	16.23%
RC0714	tissue	768	52.27%	1095009294	2094915072	98.15%	16837174	26387214	0.19%	41.54%
RC0715	plasma	1042	77.67%	1485491551	1912658326	99.56%	19356749	20222338	0.27%	81.59%
RC0716	tissue	1224	54.91%	281145659	511985780	99.76%	4377115	6359057	0.24%	19.74%
RC0717	tissue	1247	59.59%	1777982084	2983827600	99.69%	16774171	28883746	0.36%	36.69%
RC0718	tissue	446	56.05%	635681796	1134147468	99.61%	9677936	14223347	0.22%	48.40%
RC0719	tissue	482	41.07%	686448561	1671377028	98.93%	10366433	19540050	0.84%	62.70%
RC0720	tissue	1006	58.49%	231033678	394991988	99.61%	3491821	4785570	0.22%	57.99%
RC0721	tissue	1688	62.67%	387614368	618545304	99.49%	5890051	7653315	0.23%	35.77%
RC0722	tissue	575	50.34%	819707589	1628449492	99.77%	12684039	20639432	0.20%	41.60%
RC0723	plasma	1458	53.93%	2078626989	3854259710	99.73%	34434096	52974254	0.20%	52.32%
RC0724	tissue	1507	55.54%	2148331003	3868405928	99.69%	32711227	48738701	0.25%	30.73%
RC0725	tissue	1105	75.86%	1575595048	2076996932	99.76%	24542563	27215141	0.93%	17.61%
RC0726	tissue	966	52.11%	1377480009	2643453812	99.65%	21266010	33577351	0.23%	17.45%
RC0727	tissue	1756	54.79%	2502811493	4567690744	99.68%	38508523	57729887	0.89%	15.75%
RC0728	plasma	3689	59.99%	5258558749	8765695520	99.80%	67186506	90416438	0.25%	43.17%
RC0729	tissue	1097	56.21%	1563833564	2782283772	99.71%	23829783	34992593	0.17%	24.84%
RC0730	tissue	1528	49.17%	2177750014	4429159540	99.75%	33680661	55839654	0.17%	45.84%
RC0731	tissue	1391	55.18%	1983374857	3594692308	99.55%	30182698	45025467	0.21%	33.82%
RC0732	plasma	2567	55.13%	589453366	1069189520	99.54%	9928593	14461705	0.57%	48.16%
RC0733	plasma	817	35.29%	1165270869	3301556230	99.56%	19430161	44746242	0.24%	86.07%
RC0734	tissue	1698	51.49%	2421073552	4701942008	99.64%	36905696	58662630	0.23%	38.81%
RC0735	plasma	605	13.11%	862777120	6580171290	99.60%	14299512	88370552	0.69%	26.04%
RC0736	tissue	2479	52.02%	569155968	1094091060	99.78%	8885943	13591870	0.17%	31.95%
RC0737	tissue	835	81.04%	1190613575	1469096720	99.84%	18085165	19248551	0.22%	26.52%
RC0738	tissue	1586	54.64%	2261356668	4138971324	99.70%	34735784	52412272	0.22%	25.08%
RC0739	tissue	2342	54.90%	3338912856	6081579356	99.73%	51284594	77177843	0.21%	36.87%
RC0740	tissue	1679	36.53%	385487545	1055345880	99.70%	6004383	13085957	0.88%	15.66%
RC0741	plasma	1593	48.37%	2270721794	4694084430	99.69%	37748593	64271021	0.19%	66.78%
RC0742	tissue	1195	57.95%	1703309036	2939311248	99.64%	26022011	37251836	0.27%	21.12%
RC0743	plasma	767	53.71%	1092737983	2034492040	99.67%	18121451	27966267	0.20%	67.05%
RC0744	tissue	1616	52.29%	2303266982	4404425112	99.67%	35627771	55710743	0.88%	22.97%
RC0745	plasma	2382	47.08%	3395714071	7213169148	99.72%	43944739	74095070	0.26%	59.45%
RC0746	tissue	1621	54.36%	2311518144	4252582300	99.67%	28242992	41222511	0.39%	30.65%
RC0747	tissue	1625	51.64%	2316000856	4485275660	99.61%	35940148	56508971	0.83%	31.29%
RC0748	plasma	2137	51.77%	490657441	947824500	99.68%	8260599	12748049	0.26%	64.83%
RC0749	tissue	1753	55.92%	402489054	719733832	99.81%	6193522	8794228	0.20%	31.50%
RC0750	tissue	492	53.85%	702084095	1303790412	99.78%	10788964	16518225	0.17%	27.32%
RC0751	pleural effusion	6031	66.14%	8597145770	12997941086	99.95%	111498495	137644581	0.25%	36.40%
RC0752	tissue	1694	52.35%	2415193587	4613624536	99.65%	37276326	58088587	0.82%	22.81%
RC0753	plasma	3013	45.42%	714506914	1572977250	99.93%	7602809	16116651	0.31%	43.16%
RC0754	tissue	1349	71.99%	2099256001	2915961300	99.15%	19192158	28189597	0.51%	16.58%
RC0755	tissue	1522	62.25%	2368846291	3805144516	99.55%	30183217	48667343	0.32%	19.39%
RC0756	plasma	2346	64.25%	3650997018	5682555410	99.67%	51177344	79053721	0.24%	44.89%
RC0757	tissue	1670	61.31%	2380641310	3882704188	99.64%	35727360	48684205	0.22%	41.73%
RC0758	tissue	690	56.56%	984296637	1740191608	99.56%	12650477	21947280	0.21%	17.14%
RC0759	plasma	1902	53.99%	2712110140	5023762240	99.83%	44910884	69245428	0.22%	34.28%
RC0760	plasma	3372	52.69%	4806866082	9122190614	99.73%	61818944	93750579	0.23%	60.69%
RC0761	plasma	2036	29.17%	2902255915	9951122300	99.82%	47389789	135693039	0.18%	32.31%
RC0762	tissue	1054	59.12%	1503048899	2542162100	99.49%	17909239	24470285	0.40%	23.33%
RC0763	tissue	1965	56.90%	451125131	792858600	99.76%	5542091	7544114	0.37%	25.31%
RC0764	plasma	2618	47.40%	3732634263	7874711670	99.65%	61994483	105496599	0.39%	43.53%
RC0765	plasma	2906	45.14%	667364394	1478341970	99.82%	11233700	19761980	0.19%	46.63%
RC0766	plasma	5112	57.10%	7287526080	12762271524	99.75%	92387975	131361888	0.30%	29.50%
RC0767	tissue	1353	49.34%	1929041533	3909525576	99.50%	29761705	48914408	0.95%	21.81%
RC0768	pleural effusion	256	14.91%	364785494	2446390044	98.66%	4718387	24722870	0.34%	90.32%
RC0769	plasma	2193	79.14%	3125867849	3949575158	99.80%	40205969	41864136	0.29%	35.50%
RC0770	plasma	2354	33.17%	3355260569	10114214538	99.76%	42672689	103351799	0.28%	44.44%
RC0771	tissue	1149	51.82%	1637607434	3160201296	98.96%	25228122	40042907	0.15%	37.82%
RC0772	tissue	1777	54.67%	2533824410	4634680564	99.63%	39136098	58738913	0.84%	21.86%
RC0773	plasma	886	43.91%	1262362843	2875192040	99.53%	21038736	39222808	0.26%	75.28%
RC0774	tissue	1727	54.97%	2462432302	4479850476	99.73%	37802327	56899243	0.20%	26.16%
RC0775	tissue	1154	50.14%	1644983247	3280545852	99.71%	25312652	41696584	0.21%	16.53%
RC0776	tissue	1340	54.79%	307769907	561747920	99.73%	4781165	7056604	0.25%	21.07%
RC0777	tissue	1073	53.61%	1530266105	2854684488	99.75%	23345012	35608247	0.16%	40.85%
RC0778	tissue	1550	54.20%	2209566105	4076984800	99.59%	26820129	39417481	0.45%	17.66%
RC0779	plasma	2113	48.57%	3012532566	6202108500	99.58%	41994412	84926094	0.54%	45.64%
RC0780	tissue	1331	58.20%	1897402220	3259863896	99.68%	28928265	40925095	0.93%	26.44%
RC0781	plasma	1795	45.27%	2559566899	5654055632	99.65%	33241600	57798864	0.30%	68.71%
RC0782	tissue	1020	60.22%	1454172671	2414593900	99.31%	13889106	23416865	0.46%	17.81%
RC0783	plasma	1286	47.07%	1832848942	3893492470	99.57%	30523283	52855914	0.44%	68.29%
RC0784	plasma	2901	50.05%	4135566172	8262682920	99.70%	44241087	88501184	0.41%	0.5257
RC0785	tissue	1476	52.67%	2103863504	3994717300	99.30%	25772612	38631209	0.36%	17.11%
RC0786	tissue	1084	51.56%	1545032277	2996653020	99.67%	23944391	38108832	0.20%	16.36%
RC0787	tissue	1280	50.38%	1824262991	3620924400	99.64%	22558491	35250221	0.42%	18.64%
RC0788	plasma	1799	52.28%	2564173104	4904315570	99.55%	42696423	67152434	0.40%	58.42%
RC0789	plasma	2312	49.64%	530938919	1069671026	99.78%	7057699	10658196	0.32%	65.93%
RC0790	plasma	3064	44.34%	4368464785	9853271610	99.62%	72751489	128019398	0.43%	51.85%
RC0791	tissue	1456	62.59%	2266334244	3621179954	99.69%	22915384	37693797	0.38%	20.24%
RC0792	tissue	1037	61.09%	1614629599	2643079588	99.58%	20561881	33750263	0.28%	27.65%
RC0793	tissue	2650	56.35%	4124925778	7319787600	99.73%	39003058	71605412	0.41%	25.61%
RC0794	tissue	1348	45.09%	1921742562	4261955488	99.68%	19466716	43706469	0.46%	7.47%
RC0795	tissue	931	45.10%	1327180710	2942765316	99.06%	13209290	29521045	0.33%	60.38%
RC0796	pleural effusion	2332	47.01%	552904273	1176200730	99.83%	5908799	12503221	0.49%	24.41%
RC0797	tissue	1454	35.05%	333936551	952852800	99.40%	4113626	9041442	0.72%	13.17%
RC0798	plasma	2281	48.78%	3251190912	6664824002	99.72%	42103092	68517537	0.33%	53.84%
RC0799	tissue	2278	54.26%	3247555158	5985336200	99.66%	39605264	57732066	0.31%	47.77%
RC0800	plasma	2325	53.77%	3315152115	6165688326	99.70%	42662275	63379848	0.28%	48.57%
RC0801	plasma	1608	48.57%	2292370891	4719615460	99.69%	38079475	62462453	0.42%	38.98%
RC0802	tissue	4396	50.25%	1009421308	2008948700	99.76%	12657781	19199104	0.32%	34.90%
RC0803	tissue	2094	75.02%	480893573	640978700	99.87%	5949580	6387771	0.40%	18.28%
RC0804	plasma	1228	42.71%	1750652072	4099007710	99.58%	22880082	41929000	0.30%	71.98%
RC0805	plasma	3598	59.90%	5129434870	8563970204	99.74%	65177432	88132496	0.27%	55.27%
RC0806	tissue	698	52.02%	995210590	1912964612	99.66%	15481298	24335534	0.21%	17.83%
RC0807	tissue	2449	57.61%	3491193678	6060565100	99.61%	42120848	58560892	0.33%	25.38%
RC0808	tissue	2001	67.83%	3114572299	4591445760	99.53%	39876015	58748094	0.88%	20.94%
RC0809	tissue	1649	51.50%	2351266350	4565997616	99.46%	36383512	57556552	0.92%	17.99%
RC0810	tissue	2012	52.79%	2867778334	5432132800	99.61%	34995127	52689345	0.40%	19.33%
RC0811	tissue	1724	52.23%	2458161060	4706229100	99.60%	30021059	45642477	0.40%	20.61%
RC0812	plasma	839	45.39%	1195571606	2634265480	99.57%	19969985	35772587	0.46%	62.49%
RC0813	plasma	2762	55.29%	3936929411	7120038084	99.75%	50681868	73393640	0.25%	48.83%
RC0814	tissue	1646	59.38%	2345979227	3951065504	99.57%	34693097	48342091	0.90%	46.41%
RC0815	plasma	1641	45.85%	2339147123	5101445330	99.70%	30424658	52217845	0.28%	60.43%
RC0816	plasma	3231	54.74%	4606277898	8414785610	99.59%	76514042	115430091	0.66%	28.42%
RC0817	tissue	1714	59.89%	2442930821	4079078900	99.60%	29018709	39174705	0.35%	32.62%
RC0818	plasma	1491	42.86%	2125576963	4959836398	99.69%	27675937	50671310	0.30%	69.00%
RC0819	plasma	3232	56.42%	4607522518	8166338172	99.77%	58801813	84120110	0.24%	35.33%
RC0820	tissue	1526	50.81%	2175718901	4281699780	99.58%	23185905	46150599	0.36%	14.27%
RC0821	plasma	1944	53.63%	2771674513	5167995630	99.74%	46109691	70986431	0.23%	54.87%
RC0822	tissue	2328	52.40%	3318113785	6331847500	99.65%	40469796	61457828	0.38%	23.33%
RC0823	tissue	1651	52.70%	2353685355	4466140500	99.57%	28821311	43357452	0.43%	24.61%
RC0824	tissue	1629	60.66%	2322290244	3828449700	99.48%	27709537	36881026	0.39%	22.61%
RC0825	tissue	2021	76.63%	2881164290	3759977100	99.86%	35200178	37494075	0.36%	18.01%
RC0826	peritoneal effusion	5127	53.10%	7309403672	13766265784	99.79%	93745535	141792912	0.29%	29.09%
RC0827	plasma	3144	50.06%	4482194371	8953362760	99.77%	57619274	92193664	0.28%	30.41%
RC0828	tissue	1316	48.25%	1876170130	3888620332	99.60%	29118620	49106991	1.00%	19.35%
RC0829	tissue	1410	49.97%	2010419061	4022967432	99.57%	31090502	50761616	0.92%	15.47%
RC0830	tissue	1300	59.24%	1852796251	3127805460	99.58%	28212290	39525270	0.20%	28.29%
RC0831	plasma	2912	53.85%	668658664	1241635096	99.78%	8871372	12479053	0.28%	60.46%
RC0832	tissue	1511	60.23%	2153610671	3575530352	99.57%	31987916	43608337	0.92%	24.05%
RC0833	tissue	1581	53.63%	2253824005	4202708700	99.51%	27406881	40661984	0.40%	21.01%
RC0834	plasma	3328	51.44%	4744019070	9222632998	99.75%	61123434	94928233	0.27%	45.55%
RC0835	tissue	1779	53.11%	2535948333	4775108900	99.71%	30878428	46303657	0.39%	25.84%
RC0836	plasma	3801	56.95%	5419165130	9514942080	99.79%	88844498	131573935	0.21%	22.25%
RC0837	plasma	3588	56.97%	823808641	1446074140	99.76%	13815253	19532349	0.25%	35.88%
RC0838	tissue	1148	55.72%	1637124105	2938057100	98.51%	19434488	27728414	0.44%	27.82%
RC0839	plasma	2534	79.22%	3611746045	4559158860	99.81%	46426914	48315867	0.28%	50.55%
RC0840	tissue	952	60.22%	1356801145	2252966800	99.34%	16354361	21709858	0.40%	19.21%
RC0841	tissue	2272	53.41%	3239426098	6065461048	99.40%	50041676	76553120	0.93%	20.51%
RC0842	plasma	2949	52.93%	4203650031	7942430360	99.66%	54088651	81650388	0.33%	50.09%
RC0843	tissue	1206	53.20%	1719334278	3232076548	99.47%	26224166	40015111	0.95%	41.54%
RC0844	tissue	1203	55.49%	1714746044	3090423600	99.65%	20850138	29964771	0.41%	17.64%
RC0845	tissue	1507	57.29%	2149015681	3750836700	99.58%	25869012	36194735	0.38%	21.50%
RC0846	peritoneal effusion	1166	27.55%	1662411623	6033374900	99.36%	27656414	73679604	0.67%	61.37%
RC0847	tissue	1172	49.21%	1671047780	3395873420	99.43%	26028267	42843558	1.08%	23.14%
RC0848	plasma	2706	78.79%	3857587453	4896268240	99.81%	49494132	51881893	0.26%	45.20%
RC0849	tissue	2305	53.44%	529330628	990566900	99.71%	6602708	9377852	0.38%	24.81%
RC0850	plasma	2730	52.99%	3892406464	7345603492	99.76%	50177304	75672397	0.28%	46.05%
RC0851	plasma	1896	77.89%	2702791705	3469868780	99.58%	44931081	49305315	0.60%	49.20%
RC0852	tissue	1409	55.45%	2008432725	3621977600	99.65%	24230432	34961371	0.41%	17.56%
RC0853	plasma	2118	51.91%	3019776920	5817062160	99.75%	38829683	59817878	0.30%	47.31%
RC0854	tissue	1257	75.22%	1791807966	2381940700	99.86%	22051117	23758411	0.38%	13.46%
RC0855	plasma	1715	49.90%	2444967114	4899276620	99.74%	40629455	67115900	0.24%	48.45%
RC0856	plasma	1872	52.55%	2668997429	5078928190	99.78%	44087163	69704402	0.22%	42.04%
RC0857	tissue	1450	54.68%	2067319945	3780699800	99.36%	25196821	36493474	0.38%	19.61%
RC0858	tissue	551	43.33%	786113248	1814146372	99.34%	12235806	22676546	0.26%	18.93%
RC0859	tissue	1260	61.16%	1796315116	2936935400	99.49%	16605631	28172951	0.37%	27.87%
RC0860	plasma	3871	54.89%	5519111812	10054909938	99.78%	70603489	103278637	0.26%	37.70%
RC0861	tissue	853	60.02%	1216211386	2026247248	99.67%	18360272	25350327	0.22%	29.79%
RC0862	tissue	1267	53.50%	1806193224	3376048820	99.59%	27690071	42531350	0.26%	22.60%
RC0863	tissue	1263	61.65%	1955287017	3171425486	99.57%	19524498	32771626	0.51%	12.68%
RC0864	tissue	1724	48.63%	408810238	840740136	99.64%	4096005	8572047	0.38%	25.20%
RC0865	pleural effusion	2493	43.23%	591252399	1367541450	99.91%	6283309	14468955	0.38%	35.88%
RC0866	tissue	1092	60.78%	1699466188	2795964106	99.43%	17101831	28961071	0.40%	22.81%
RC0867	pleural effusion	1800	50.56%	2802127439	5541867100	99.72%	39215350	76605859	0.23%	52.06%
RC0868	pleural effusion	1276	54.60%	1818689313	3330771300	99.79%	17386472	32450115	0.35%	16.42%
RC0869	plasma	2180	50.33%	3107722526	6175159130	99.75%	51545660	84838465	0.23%	40.84%
RC0870	tissue	2110	53.10%	3008218740	5665619700	99.46%	36601935	54679108	0.39%	21.95%
RC0871	tissue	1669	51.41%	2378674935	4627224052	99.57%	36948504	58692292	0.98%	18.45%
RC0872	tissue	1694	53.36%	2414844011	4525560200	99.65%	29502316	43889630	0.40%	19.67%
RC0873	tissue	1759	53.31%	2508204341	4704612600	99.75%	30443291	45453173	0.36%	29.02%
RC0874	plasma	4026	66.32%	5740064274	8655559010	99.74%	57468451	89618061	0.26%	49.56%
RC0875	tissue	1043	62.50%	1486457362	2378337844	99.69%	19095611	30316603	0.26%	19.52%
RC0876	plasma	2353	41.55%	3354076721	8073184924	99.70%	43586461	79915909	0.28%	54.65%
RC0877	peritoneal effusion	3892	49.37%	5549034836	11239233798	99.70%	70526312	115601566	0.38%	31.05%
RC0878	plasma	2449	58.77%	3491114432	5940355756	99.74%	35359353	61177317	0.26%	47.80%
RC0879	tissue	1247	58.58%	1778204583	3035692700	99.38%	21693682	29427642	0.37%	18.82%
RC0880	tissue	1303	62.62%	2018237354	3223147100	99.56%	18906794	31185161	0.37%	44.39%
RC0881	tissue	931	54.42%	1441995905	2649946948	99.75%	18414039	33685133	0.28%	28.75%
RC0882	tissue	1017	58.54%	1583111197	2704325856	99.74%	16212483	28217987	0.45%	7.35%
RC0883	tissue	699	45.55%	1087353578	2387116934	99.54%	11073923	24561031	0.51%	3.87%
RC0884	tissue	1548	61.89%	2409351970	3892720104	99.20%	24108921	40151266	0.38%	21.83%
RC0885	tissue	842	48.83%	1200142997	2458031600	99.58%	14789287	23824946	0.43%	16.72%
RC0886	plasma	2637	58.51%	3759081086	6425021260	99.59%	61959471	87793609	0.42%	43.09%
RC0887	plasma	1241	42.76%	1769809308	4139082990	99.64%	29448485	56434540	0.27%	65.26%
RC0888	plasma	2680	53.97%	3820136322	7078677708	99.74%	49115696	72754008	0.26%	49.41%
RC0891	tissue	682	58.99%	1055793062	1789869604	99.63%	10570071	18311749	0.30%	61.39%
RC0892	plasma	3531	50.03%	5033427076	10061046270	99.85%	53594093	107999079	0.37%	0.5084
RC0893	tissue	1425	51.15%	2031301607	3971236740	99.75%	31334273	50413526	0.22%	21.57%
RC0894	tissue	812	47.14%	1158191211	2457081596	99.50%	17884737	30844232	0.24%	15.35%
RC0895	tissue	1976	52.81%	2816381090	5332659320	99.62%	43170120	67185255	0.19%	25.72%
RC0896	tissue	864	56.95%	1231810501	2163116256	99.43%	18580303	26960291	0.20%	20.21%
RC0897	plasma	2016	53.88%	2874207013	5334948780	99.81%	47380087	73241735	0.17%	44.63%
RC0898	tissue	2074	54.24%	476292495	878196568	99.68%	7394577	10962041	0.21%	20.27%
RC0899	tissue	2148	57.10%	493172139	863723000	99.70%	6123230	8260156	0.41%	17.39%
RC0900	tissue	1169	52.27%	1666125189	3187639728	99.70%	25617076	40533657	0.26%	17.13%
RC0901	tissue	742	44.37%	1058492143	2385533500	99.69%	13112056	23019859	0.35%	51.89%
RC0902	tissue	1805	58.58%	2809324247	4795516408	99.77%	28545157	49917827	0.37%	10.65%
RC0903	tissue	1624	60.44%	2528426124	4183533450	99.52%	25447798	43343250	0.42%	14.63%
RC0904	peritoneal effusion	1217	47.40%	1893782851	3995224870	99.32%	26573195	54584448	0.51%	68.20%
RC0905	tissue	1262	54.51%	1799098518	3300513028	99.75%	27556372	41774564	0.22%	23.78%
RC0906	tissue	398	17.87%	567395596	3174962624	99.32%	8739398	39558853	0.22%	13.31%
RC0907	plasma	4973	51.51%	7089176028	13763590740	99.85%	75462438	148103564	0.35%	0.3558
RC0908	tissue	1109	66.92%	1717490306	2566305938	98.97%	16975517	26421124	0.35%	33.70%
RC0909	pleural effusion	3822	66.36%	5918672682	8918724136	99.80%	59182159	92692615	0.34%	23.31%
RC0910	tissue	1667	48.23%	2377119868	4928448684	99.33%	36593441	61829217	1.02%	19.13%
RC0911	plasma	2418	47.50%	3446690400	7256452630	99.64%	57036220	99299502	0.43%	39.64%
RC0912	tissue	1413	54.81%	2013831620	3674001600	99.33%	24402399	35427291	0.41%	20.73%
RC0913	tissue	1453	58.07%	2261905917	3894848828	98.99%	23027139	40525054	0.39%	28.85%
RC0914	plasma	1450	41.27%	2067007555	5008502590	99.67%	34483788	68123831	0.24%	64.52%
RC0915	tissue	1273	59.26%	292199504	493113764	99.70%	4484966	6063232	0.23%	23.24%
RC0916	tissue	1164	52.09%	1659980300	3186649752	99.51%	25789259	40162876	0.91%	9.54%
RC0917	plasma	2648	51.22%	3775230012	7369983708	98.99%	48952384	75768053	0.61%	36.82%
RC0918	tissue	1602	54.20%	2283769836	4213797032	99.67%	23052012	43273888	0.45%	27.65%
RC0919	tissue	304	52.63%	473307828	899228158	99.67%	4801180	9287375	0.52%	3.55%
RC0920	tissue	772	55.32%	1100433173	1989112800	99.59%	10500402	19202725	0.36%	16.60%
RC0921	tissue	779	51.71%	1109922163	2146354600	99.37%	13593413	20642718	0.39%	16.36%
RC0922	tissue	1842	53.08%	2625244225	4945947800	99.59%	32114904	47878542	0.39%	25.12%
RC0923	tissue	1123	32.55%	1601077022	4918916900	99.27%	19458410	46930959	0.42%	13.97%
RC0924	tissue	615	58.15%	876028898	1506603500	99.34%	8291863	14522547	0.34%	18.32%
RC0925	tissue	986	48.62%	1405396869	2890734812	99.77%	14406043	29881676	0.53%	5.91%
RC0926	tissue	1228	51.07%	1750829394	3427969534	99.59%	17889650	35262136	0.47%	5.82%
RC0927	tissue	836	50.40%	1192469583	2366172372	99.78%	15321839	30125995	0.36%	6.56%
RC0928	tissue	982	54.05%	1399828320	2589640720	99.60%	17447037	31141587	0.23%	48.85%
RC0929	tissue	1836	54.65%	2617421732	4789820970	99.44%	27631802	51056954	0.37%	15.14%
RC0930	tissue	655	52.28%	934034406	1786619096	99.70%	11994510	22621801	0.18%	21.12%
RC0931	tissue	1612	53.37%	2297491101	4305209700	99.68%	21860915	41836574	0.39%	21.14%
RC0932	tissue	887	56.19%	1264662389	2250880220	99.38%	18662320	27337859	0.31%	36.16%
RC0933	plasma	4310	52.85%	989719791	1872730510	99.80%	13059998	18929854	0.27%	36.02%
RC0934	tissue	891	51.83%	1269843857	2450037004	99.66%	19464823	30745994	0.19%	26.91%
RC0935	tissue	1778	60.37%	2534050270	4197549600	99.75%	23935565	40730902	0.35%	25.74%
RC0936	pleural effusion	1907	49.78%	2719212905	5462913212	99.66%	27534380	55949155	0.27%	59.75%
RC0937	plasma	2105	49.28%	3000675951	6088878460	99.75%	49720995	83570539	0.21%	43.88%
RC0938	plasma	1823	41.29%	2599032177	6294849000	99.83%	39104679	91435470	0.34%	0.3615
RC0939	tissue	882	51.18%	1257458842	2456772276	99.67%	19380303	30934133	0.24%	13.56%
RC0940	tissue	1229	60.06%	1913623404	3186053390	99.49%	19461476	33082153	0.47%	6.40%
RC0941	tissue	505	44.99%	785758798	1746623868	99.36%	9773898	21678881	0.27%	33.94%
RC0942	plasma	3077	56.46%	4789576651	8482540710	99.54%	67363711	117286038	0.38%	48.78%
RC0943	plasma	2390	44.85%	3407575307	7596969300	99.77%	36318166	81300519	0.38%	0.5403
RC0944	tissue	1499	57.47%	2136512226	3717722300	99.64%	20334729	36061740	0.33%	18.54%
RC0945	tissue	886	41.64%	1262593480	3031992900	99.54%	15501278	29217855	0.35%	17.98%
RC0946	tissue	978	63.16%	1523056609	2411490640	99.69%	19530497	30912653	0.26%	16.66%
RC0947	plasma	2888	60.58%	4117666049	6796927278	99.68%	41838572	70093613	0.29%	55.01%
RC0948	tissue	1158	58.71%	1650533292	2811483504	99.65%	21046210	35567943	0.22%	17.25%
RC0949	tissue	1608	61.52%	2490811526	4049013246	99.46%	25030117	41852085	0.39%	19.72%
RC0950	plasma	2870	52.72%	4444623064	8429880420	99.88%	47689200	91080140	0.39%	31.42%
RC0951	tissue	1355	60.24%	2097681669	3482309148	99.72%	21129404	36216150	0.47%	12.22%
RC0952	tissue	1354	59.06%	2097239834	3550914202	99.75%	21188418	36752640	0.32%	16.56%
RC0953	plasma	1308	47.99%	1864752654	3885419688	99.51%	18968295	39674692	0.35%	74.37%
RC0954	tissue	113	34.99%	175338481	501138816	99.35%	1745081	4939424	0.35%	95.96%
RC0955	tissue	1042	45.86%	1485411759	3239166510	99.45%	15881606	34774209	0.41%	5.62%
RC0956	tissue	659	54.45%	939813199	1726073848	99.75%	11943495	21635148	0.17%	40.89%
RC0958	tissue	1071	58.97%	1666787999	2826467436	99.72%	21289325	36142118	0.25%	19.64%
RC0959	tissue	1350	54.70%	1924354831	3518320896	99.73%	24594421	44549459	0.26%	16.86%
RC0960	tissue	1693	58.46%	2413249315	4128274932	99.67%	31283964	52451622	0.88%	21.06%
RC0961	tissue	1466	60.35%	2090508782	3463715100	99.42%	19617199	33336643	0.36%	25.95%
RC0962	plasma	2201	50.76%	3138103278	6182413578	99.84%	46933760	89752485	0.31%	0.4836
RC0963	tissue	1355	60.88%	1932354634	3173974000	99.59%	18162527	30602533	0.35%	32.94%
RC0964	pleural effusion	1849	52.33%	2878396597	5500845126	99.53%	29389231	57113504	0.41%	55.38%
RC0965	tissue	1601	63.31%	379699126	599770196	99.45%	3744618	6016414	0.31%	53.16%
RC0966	plasma	3475	50.12%	5381362341	10737240390	99.88%	57212879	115181354	0.32%	36.85%
RC0967	plasma	2895	48.37%	4505869804	9314731800	99.74%	47942239	100634259	0.39%	36.18%
RC0968	tissue	1538	61.37%	2381856840	3880987118	99.83%	24061102	40426501	0.37%	19.39%
RC0969	tissue	1407	65.01%	2178232534	3350732836	99.69%	21803566	34720388	0.36%	23.10%
RC0970	plasma	3583	52.68%	822693131	1561828330	99.79%	10854490	15703782	0.30%	42.26%
RC0971	tissue	1839	52.94%	2621159481	4951471100	99.71%	31888784	48023526	0.38%	20.65%
RC0972	tissue	930	59.80%	1448298531	2421951360	99.47%	14458531	24857576	0.30%	55.39%
RC0973	tissue	977	58.02%	1512695881	2607032028	99.80%	19274091	32962658	0.23%	33.25%
RC0974	tissue	1723	54.76%	2668449107	4873021758	99.67%	27058226	50237274	0.39%	22.75%
RC0975	plasma	2661	57.53%	4120599222	7162094070	99.87%	43936654	77296034	0.39%	54.90%
RC0976	tissue	1445	59.03%	2060205449	3490384208	99.78%	26371174	44157146	0.18%	32.09%
RC0977	tissue	750	39.74%	1068619540	2689016344	99.62%	16534991	33789002	0.23%	15.64%
RC0978	plasma	2285	57.02%	3538428940	6205433400	99.87%	37684168	67230138	0.36%	50.44%
RC0979	tissue	1417	45.21%	325324810	719625912	99.67%	4118573	8842406	0.86%	46.62%
RC0980	tissue	961	51.48%	1370137221	2661676864	99.73%	17578515	33345416	0.29%	25.65%
RC0981	tissue	1622	64.17%	2524337277	3934106400	99.66%	23798233	38566467	0.43%	17.49%
RC0982	pleural effusion	982	44.50%	225495907	506740920	99.64%	3752107	6718119	0.27%	75.14%
RC0983	tissue	800	53.53%	1244928800	2325874968	99.73%	16051603	29812742	0.33%	6.54%
RC0984	tissue	890	53.01%	1268314716	2392806496	99.58%	19602038	30200048	0.96%	36.71%
RC0985	plasma	4115	63.93%	6405500634	10019653740	99.88%	68215402	109457330	0.29%	34.73%
RC0986	plasma	3444	56.28%	5361487437	9526728240	99.68%	57375323	102994376	0.55%	63.50%
RC0987	tissue	1585	59.97%	2466897047	4113674718	99.53%	24723323	42445057	0.40%	18.40%
RC0988	tissue	2767	50.52%	656054185	1298713870	99.49%	6549791	13112002	0.37%	16.88%
RC0989	tissue	1179	59.70%	1835943011	3075116846	98.92%	18352110	31598093	0.35%	49.93%
RC0990	tissue	701	55.34%	999447512	1806067876	99.71%	12734662	22832476	0.24%	23.63%
RC0991	tissue	1032	55.62%	1470711879	2644203552	99.67%	18680415	33088763	0.19%	30.85%
RC0992	plasma	2156	53.77%	3073636852	5716444404	99.83%	45984562	83343909	0.27%	0.4869
RC0993	tissue	1381	46.86%	1968144411	4199713800	99.61%	18389720	40252277	0.42%	21.04%
RC0994	tissue	1794	53.66%	2557326226	4765702100	99.71%	31224948	46266556	0.39%	19.47%
RC0995	tissue	1250	61.57%	1936275525	3144927074	99.25%	19437513	32634892	0.39%	23.53%
RC0996	tissue	1091	55.46%	1554751770	2803185824	99.80%	19922483	35510406	0.26%	23.39%
RC0997	tissue	1111	50.87%	1583556215	3112949284	99.73%	20368709	39741819	0.36%	17.08%
RC0998	tissue	1489	51.26%	2122114475	4139914320	99.60%	22603840	44680490	0.37%	12.38%
RC0999	plasma	3421	55.27%	4876588574	8823637684	99.82%	49437989	91057818	0.28%	33.71%
RC1000	tissue	1182	57.80%	1684791240	2914904304	99.57%	21648053	37086071	0.26%	25.75%
RC1001	tissue	469	58.89%	730175426	1239949206	97.26%	7265767	12679792	0.40%	68.14%
RC1002	tissue	1298	55.17%	1850693126	3354640532	99.86%	23864117	42680844	0.31%	14.99%
RC1003	plasma	3267	58.00%	5085171669	8767106010	99.87%	54029364	95164501	0.36%	35.85%
RC1004	tissue	806	54.50%	1253873733	2300831828	99.79%	16121724	29510153	0.34%	7.56%
RC1005	tissue	2115	62.71%	3275411711	5223022204	99.59%	32744665	54132662	0.61%	25.43%
RC1006	tissue	2094	62.26%	3260184498	5236051262	99.03%	32892306	54395430	0.36%	20.00%
RC1007	plasma	2766	57.63%	4306188542	7472431980	99.88%	45633043	80857593	0.33%	44.23%
RC1008	tissue	1101	56.80%	1714500338	3018358048	99.72%	17461501	31375611	0.43%	7.66%
RC1009	tissue	989	54.11%	1409830265	2605674440	99.43%	18217262	32805640	0.94%	19.02%
RC1010	tissue	1053	54.74%	1630290513	2978023444	99.67%	20849181	37691557	0.29%	25.81%
RC1011	tissue	1562	58.23%	2418159094	4152490890	99.35%	24510780	42565977	0.36%	15.90%
RC1012	tissue	1022	52.75%	1583154341	3001004324	99.74%	20336658	38310733	0.33%	9.32%
RC1013	plasma	3545	61.52%	5518012909	8969544810	99.87%	58632190	97414948	0.37%	37.53%
RC1014	tissue	1826	63.58%	2842585847	4470947098	99.54%	28557032	46314195	0.40%	16.14%
RC1015	tissue	1821	58.36%	2834578752	4857232202	99.61%	28709861	50490526	0.45%	11.03%
RC1016	tissue	1068	55.99%	1661977562	2968268644	99.66%	16917349	30815567	0.45%	5.22%
RC1017	tissue	1820	59.45%	2593923807	4363382334	99.13%	26504208	45185612	0.45%	11.28%
RC1018	tissue	1271	36.58%	1811806710	4953362336	99.13%	18364559	50455860	0.42%	7.45%
RC1019	plasma	2047	54.94%	3169219486	5768093970	99.86%	33657896	62404777	0.30%	51.13%
RC1021	peritoneal effusion	1738	46.44%	2478223665	5335930868	99.57%	25302543	54876278	0.36%	55.71%
RC1022	tissue	1061	57.80%	1512981543	2617531808	99.71%	19383890	32990600	0.88%	28.29%
RC1023	tissue	1670	60.96%	2381332732	3906170400	99.26%	22713289	37889953	0.46%	15.05%
RC1024	plasma	2521	56.67%	3593668637	6340911940	99.46%	36668990	65436970	0.33%	41.79%
RC1025	plasma	2986	52.22%	4256333979	8151523584	99.75%	43025706	83887630	0.25%	50.38%
RC1026	plasma	3304	54.05%	4709671194	8712805574	99.77%	46999785	89525319	0.22%	46.80%
RC1027	plasma	3111	59.19%	4434758359	7492936648	99.74%	44499712	77008094	0.24%	51.72%
RC1028	plasma	2780	56.91%	3963243315	6963815254	99.75%	40098651	71759233	0.23%	52.64%
RC1029	plasma	2831	63.43%	4036042355	6362739460	99.51%	56473485	87256985	0.44%	48.74%
RC1030	tissue	1262	61.02%	1964714944	3219602100	99.55%	18679670	31466677	0.43%	14.45%
RC1031	tissue	1586	59.31%	2469375125	4163618328	99.27%	25068929	43417167	0.43%	18.23%
RC1032	plasma	3325	58.96%	5176298508	8778750030	99.87%	54898998	95026371	0.36%	44.29%
RC1033	tissue	644	27.58%	1002566909	3635526272	97.90%	25416074	45067383	0.09%	57.49%
RC1034	tissue	1325	59.83%	2051634771	3429086066	99.15%	20573842	34590438	0.40%	20.58%
RC1035	tissue	882	62.28%	1256693581	2017675512	99.70%	16032084	25696782	0.23%	25.27%
RC1036	tissue	1780	55.10%	422027152	765888594	99.82%	4214968	7772142	0.37%	16.08%
RC1037	tissue	1541	62.89%	2196865953	3493035012	99.70%	28541010	44544696	0.82%	32.45%
RC1038	tissue	4714	54.21%	1082341308	1996532090	99.60%	18025134	26860263	0.50%	31.45%
RC1039	tissue	1261	56.40%	1963395573	3481101248	99.66%	19937379	35988251	0.44%	31.92%
RC1040	tissue	1464	59.27%	2278469590	3844385774	99.59%	22960876	39714816	0.36%	22.62%
RC1041	tissue	1638	63.18%	2549436055	4035337268	99.64%	32691468	51482514	0.88%	22.32%
RC1042	tissue	1026	56.76%	1596750102	2813061416	99.71%	20426654	35921404	0.17%	20.16%
RC1043	plasma	2304	37.82%	546405828	1444758480	99.74%	5786794	14891184	0.37%	72.96%
RC1044	tissue	1435	54.02%	2222769957	4114903580	99.57%	22482555	42322588	0.38%	19.73%
RC1045	tissue	662	35.97%	156890869	436163102	98.26%	1541063	4178154	0.29%	55.18%
RC1046	plasma	3073	58.96%	4381366728	7431509810	99.72%	44391776	76726136	0.26%	53.51%
RC1048	plasma	3125	61.17%	4864040101	7952159160	99.86%	51833445	86283339	0.30%	40.24%
RC1049	plasma	2412	57.20%	3438052569	6010566706	99.67%	34942878	61810157	0.28%	56.58%
RC1050	tissue	1565	57.90%	2230376423	3851795700	99.57%	21037558	37261425	0.39%	23.52%
RC1051	tissue	857	59.72%	1333311651	2232742516	99.45%	16999271	28334682	0.27%	28.88%
RC1052	tissue	1930	62.13%	3003512832	4834459104	99.55%	38497016	61526716	0.90%	21.66%
RC1053	tissue	1446	59.36%	2250114006	3790861046	99.57%	22879685	39124809	0.43%	20.01%
RC1054	plasma	2596	54.10%	4040499028	7468835220	99.85%	42987961	80756393	0.39%	48.89%
RC1055	plasma	3011	58.12%	4686170199	8063091000	99.85%	49846796	87391161	0.38%	44.96%
RC1056	tissue	202	38.50%	312500871	811649600	99.73%	3981581	9954368	0.77%	89.36%
RC1058	tissue	1821	60.89%	2820073564	4631674878	99.08%	28326632	46927991	0.40%	37.84%
RC1059	plasma	2534	56.81%	3924134918	6907122270	99.87%	41731211	74493032	0.33%	47.74%
RC1060	tissue	1342	42.67%	2078605394	4871527252	99.61%	20597456	49421028	0.36%	21.84%
RC1061	tissue	1131	71.05%	1751862160	2465760154	99.62%	17970588	25211781	0.25%	58.13%
RC1062	tissue	1179	59.58%	1834959955	3079880300	99.44%	17324285	29990669	0.41%	16.86%
RC1063	tissue	1128	70.53%	1756566722	2490628400	99.39%	16248610	24239786	0.40%	46.62%
RC1064	tissue	1758	59.92%	2737202348	4568154566	99.78%	27704965	47452839	0.40%	19.68%
RC1065	plasma	2570	50.71%	3663806314	7225262640	99.80%	39125638	77597064	0.38%	0.5232
RC1066	tissue	977	60.45%	1512502198	2501899582	99.62%	15206466	26043596	0.52%	20.26%
RC1067	plasma	1665	44.27%	2578473949	5825006820	99.84%	27545092	62399173	0.38%	62.78%
RC1068	plasma	2943	58.01%	4580597998	7896184380	99.86%	48842818	85439554	0.38%	44.98%
RC1069	tissue	1329	57.14%	2068415844	3619845530	99.69%	21040153	37641623	0.42%	16.97%
RC1070	tissue	1237	62.72%	1916072781	3054974150	99.75%	19140444	31772052	0.46%	16.01%
RC1071	plasma	1125	23.83%	1742703442	7312852440	99.88%	18605033	77830904	0.39%	40.32%
RC1072	plasma	1939	56.70%	3018554439	5323461430	99.69%	42171751	73617464	0.25%	60.02%
RC1073	tissue	926	43.70%	1441895942	3299897656	99.60%	18394345	41888164	0.26%	20.52%
RC1074	tissue	1336	53.60%	1904389893	3553225470	99.63%	20223160	38009660	0.36%	26.37%
RC1075	tissue	1563	51.39%	358959717	698547768	99.76%	4532839	8756063	0.26%	24.43%
RC1076	tissue	1745	59.90%	2702770310	4511871596	99.09%	27239147	45899152	0.31%	27.71%
RC1077	tissue	1176	60.93%	1820344649	2987436936	99.86%	18274940	31055017	0.35%	18.89%
RC1078	plasma	1581	54.25%	2448613135	4513757640	99.39%	34491139	62226226	0.25%	56.45%
RC1079	tissue	1331	59.85%	2071023784	3460348400	99.79%	26495275	44426615	0.32%	21.83%
RC1080	tissue	1127	62.34%	1745479080	2799719782	99.73%	17567868	29052475	0.47%	23.17%
RC1081	plasma	2827	55.52%	4378150651	7885069830	99.86%	46705749	85330871	0.32%	52.20%
RC1082	tissue	1489	67.95%	2317767569	3410795184	99.75%	29636795	43938136	0.23%	24.37%
RC1083	plasma	2166	29.25%	3371397438	11525213070	99.91%	35726979	123118346	0.32%	21.12%
RC1084	plasma	2206	58.13%	3434534872	5907932370	99.85%	36576901	64006120	0.52%	34.48%
RC1085	tissue	2434	50.80%	577288596	1136344850	99.42%	5762270	11477542	0.44%	14.09%
RC1086	plasma	3690	61.49%	5744421950	9342251460	99.90%	60782903	101114946	0.35%	39.03%
RC1087	tissue	2532	50.42%	600360477	1190701008	99.17%	5993286	12007328	0.38%	14.38%
RC1088	plasma	2956	57.78%	700879293	1213080050	99.66%	9868583	16316377	0.46%	41.99%
RC1089	tissue	1162	54.64%	1656525687	3031635668	99.66%	21092149	38322350	0.24%	17.01%
RC1090	tissue	1425	46.65%	327239580	701542396	98.79%	4159697	8609560	0.92%	52.81%
RC1091	tissue	1057	51.59%	1636463369	3172222520	99.61%	21004895	40437756	0.33%	12.85%
RC1092	plasma	1622	51.00%	2512376588	4926684690	98.68%	26956077	52937715	0.56%	70.10%
RC1093	tissue	1113	59.24%	1723201440	2909056728	99.81%	17349775	30195789	0.42%	37.38%
RC1094	peritoneal effusion	2378	52.68%	3701350094	7025750726	99.67%	37351381	72551918	0.29%	55.81%
RC1095	plasma	2985	60.20%	4646437648	7717949550	99.83%	49565393	83876014	0.43%	35.38%
RC1096	tissue	1834	64.40%	2839696979	4409693408	99.37%	28637184	44344860	0.31%	51.57%
RC1097	tissue	1157	58.90%	1650090496	2801566872	99.58%	21025494	34799369	0.86%	52.29%
RC1098	tissue	1492	52.04%	353847010	679978300	99.60%	3353183	6474984	0.52%	25.48%
RC1099	tissue	1280	57.29%	1824543382	3184656500	99.82%	23447140	40618976	0.29%	12.71%
RC1101	plasma	4389	66.43%	6796948318	10231650242	99.73%	68592746	106583470	0.33%	43.77%
RC1102	plasma	3391	60.96%	5278789698	8659677420	99.86%	56241417	94008485	0.30%	39.07%
RC1103	plasma	2126	50.59%	3030483609	5990028066	99.82%	45346773	86995417	0.34%	0.4784
RC1104	tissue	938	55.90%	1452003731	2597458688	99.23%	18711632	33130111	0.21%	28.20%
RC1105	tissue	1771	34.74%	1932147595	5562012260	98.75%	32854788	74540271	1.33%	58.99%
RC1106	tissue	701	51.37%	999836947	1946528644	99.82%	12951203	24870546	0.39%	6.09%
RC1107	plasma	4318	51.17%	991523228	1937584980	99.82%	10429537	20345086	0.34%	0.495
RC1108	tissue	913	48.59%	216441811	445439572	99.57%	2735608	5307398	0.25%	57.57%
RC1109	plasma	2896	59.06%	4507959409	7633460970	99.85%	48102744	82944196	0.36%	42.15%
RC1110	plasma	3523	57.41%	5023024091	8749786302	99.80%	50890544	90344886	0.29%	35.49%
RC1111	plasma	3336	61.25%	5193124720	8478529380	99.86%	55514263	92176028	0.37%	41.69%
RC1112	plasma	2720	47.89%	3877274153	8096934060	99.81%	41227344	86765502	0.37%	0.5659
RC1113	plasma	3914	49.21%	928029725	1885909590	99.90%	9863991	19973847	0.33%	37.84%
RC1114	plasma	2657	50.37%	629952786	1250628480	99.89%	6720209	13160662	0.33%	47.69%
RC1115	tissue	1448	64.42%	2254610918	3499727192	99.71%	28789305	44891851	0.23%	22.86%
RC1116	tissue	1839	61.61%	2862101936	4645451424	99.70%	28911050	48312449	0.39%	10.66%
RC1117	plasma	2100	61.27%	3269335999	5336055620	99.72%	45729416	74284560	0.23%	43.37%
RC1118	tissue	1043	46.10%	1624220886	3523548480	99.76%	20834255	44966945	0.31%	15.38%
RC1119	plasma	2804	48.69%	4364752046	8963889480	99.84%	46534414	96741359	0.41%	39.03%
RC1120	plasma	3620	60.29%	5635443201	9346922370	99.77%	60043193	101308018	0.39%	41.56%
RC1121	plasma	3468	58.32%	5398564822	9256861800	99.84%	58017903	100110676	0.39%	32.53%
RC1122	plasma	2748	61.11%	4255901202	6964332030	99.84%	45503135	75240993	0.34%	40.70%
RC1124	plasma	2771	63.36%	4312855102	6806927430	99.91%	45752220	74091845	0.31%	28.29%
RC1125	tissue	1276	55.96%	1986416841	3549840158	99.66%	20192649	36879275	0.37%	26.59%
RC1127	tissue	843	57.33%	1312050218	2288766896	99.55%	13235634	23683799	0.52%	11.27%
RC1128	tissue	1287	49.49%	1834222639	3706556018	99.69%	18698294	38110569	0.48%	25.74%
RC1129	tissue	1079	58.14%	1538866041	2646695516	99.80%	19722135	33615314	0.23%	25.45%
RC1130	tissue	1759	70.15%	2737511131	3902548472	99.79%	35170956	50414762	0.23%	22.58%
RC1131	tissue	1010	56.13%	1572484960	2801621136	99.66%	20102567	35808988	0.26%	14.38%
RC1132	tissue	997	58.09%	1552056476	2671835632	99.77%	19917753	34346352	0.33%	19.44%
RC1133	tissue	1474	60.83%	2294983739	3772969536	99.73%	29375836	48443468	0.32%	21.91%
RC1134	tissue	1103	57.19%	1716562133	3001639760	99.38%	22123570	38552693	0.31%	29.18%
RC1135	tissue	2893	49.26%	664174613	1348197900	98.96%	11265790	18030293	0.99%	57.29%
RC1136	tissue	1120	58.43%	1596014521	2731403672	99.47%	24289044	34042165	0.95%	34.96%
RC1137	tissue	817	63.16%	1272074261	2013915184	99.71%	16395738	26001436	0.34%	11.75%
RC1138	tissue	1877	42.31%	2047758301	4839354030	99.12%	34438020	65024998	1.04%	41.14%
RC1139	tissue	1381	53.90%	1969063928	3652954820	99.60%	30530085	46165375	0.89%	21.72%
RC1140	tissue	976	53.87%	1519613257	2820760140	99.75%	19470307	36022988	0.30%	33.89%
RC1141	tissue	1283	63.24%	1997839413	3159285420	99.72%	25775952	40604168	0.30%	21.27%
RC1142	tissue	976	56.64%	1518639636	2681142896	99.46%	19413472	34077118	0.29%	30.93%
RC1143	tissue	1021	57.95%	1589704409	2743059868	99.78%	20336275	35178879	0.31%	16.38%
RC1144	tissue	2487	58.10%	571040777	982919172	99.73%	8937451	12243652	0.89%	23.53%
RC1145	tissue	1039	57.03%	1617724002	2836668156	99.79%	20722826	36405804	0.35%	17.84%
RC1146	tissue	902	50.35%	1403924993	2788192468	99.76%	18029711	35496305	0.29%	20.96%
RC1147	tissue	775	40.61%	1200553176	2956395972	99.68%	15382660	37442358	0.30%	25.19%
RC1148	tissue	1064	54.45%	1647672613	3025757600	99.81%	21112132	38687663	0.29%	21.32%
RC1149	tissue	943	49.86%	1460374750	2928793076	99.62%	18716390	37266663	0.30%	20.32%
RC1150	tissue	1443	52.57%	2056419912	3912101410	99.59%	34109328	53514599	0.41%	53.84%
RC1151	tissue	2313	42.01%	2523370733	6007026410	99.20%	42408376	81187868	1.18%	18.04%
RC1152	tissue	1339	66.96%	2073190618	3096125376	99.69%	20752543	32190992	0.53%	30.44%
RC1153	plasma	3114	52.76%	4822153217	9140340510	99.89%	51746845	98542855	0.38%	37.62%
RC1154	plasma	2970	60.58%	4623002426	7631145270	99.87%	49196042	82932049	0.36%	41.73%
RC1155	plasma	1741	52.90%	2481581476	4691387814	99.44%	25299944	48211630	0.32%	52.93%
RC1156	tissue	1178	58.95%	1679084661	2848535556	99.33%	21539161	36322189	0.26%	15.20%
RC1157	plasma	3163	64.69%	4897431639	7571192310	99.69%	51771636	82248792	0.42%	40.86%
RC1158	tissue	1834	59.19%	2839364249	4796852336	99.70%	28552180	49844548	0.42%	16.74%
RC1159	plasma	3235	63.48%	5010146830	7893047160	99.81%	53089711	85490743	0.47%	52.48%
RC1160	CSF	236	29.50%	365986898	1240641220	98.25%	5107422	16554079	0.68%	95.32%
RC1161	tissue	2334	50.40%	553521131	1098298726	98.91%	5590702	11233759	0.35%	21.92%
RC1162	tissue	1809	61.23%	2815962277	4598950094	99.58%	28504014	47844273	0.39%	21.51%
RC1163	tissue	939	67.72%	1461313958	2157729300	99.61%	13485665	20868619	0.47%	44.97%
RC1164	tissue	938	56.84%	1452424653	2555293280	99.42%	18478631	32084250	0.26%	21.15%
RC1165	tissue	1402	64.71%	2170780953	3354742594	99.46%	21837816	34186430	0.48%	34.05%
RC1166	tissue	583	56.49%	906816124	1605127448	99.79%	11608971	20514517	0.29%	13.39%
RC1167	plasma	3597	46.26%	852896307	1843889400	99.89%	9054394	19303059	0.36%	37.03%
RC1168	tissue	1521	58.43%	2354646726	4029760354	99.32%	23837821	40978452	0.32%	36.67%
RC1169	tissue	1151	60.06%	1791062028	2982191000	99.59%	16996621	29123456	0.43%	13.60%
RC1170	tissue	560	57.63%	872202942	1513360716	99.65%	11184066	19302230	0.23%	10.31%
RC1171	tissue	873	59.77%	1358377762	2272800976	99.68%	17346385	29114578	0.20%	15.53%
RC1172	tissue	591	57.95%	919963988	1587614008	99.64%	11814493	20328467	0.35%	12.71%
RC1173	plasma	3882	63.30%	6042828676	9546273180	99.85%	64002573	103514996	0.35%	43.54%
RC1174	tissue	1307	58.63%	2033834521	3469030520	99.61%	20530587	35876703	0.38%	21.31%
RC1175	tissue	852	57.14%	1326545739	2321578612	99.63%	16955083	29680940	0.30%	17.47%
RC1176	tissue	1157	56.54%	1800677816	3184700960	99.70%	23038341	40732920	0.32%	25.28%
RC1177	tissue	1668	57.61%	2596741527	4507640468	99.63%	26260566	46842829	0.42%	8.13%
RC1178	tissue	1809	47.51%	428872251	902648254	99.35%	4320058	9145783	0.41%	22.00%
RC1179	plasma	2678	56.26%	4168546547	7409544210	99.88%	44550378	80339555	0.39%	39.94%
RC1180	tissue	1051	64.87%	1627213433	2508412184	99.76%	16457453	26065574	0.34%	28.56%
RC1181	tissue	1719	58.04%	2662385065	4587087670	99.71%	26958032	47573084	0.50%	15.85%
RC1182	plasma	3310	55.83%	5125581156	9180991350	99.88%	54514549	98853641	0.33%	35.73%
RC1183	plasma	1410	44.16%	2195507783	4971510900	99.52%	23430083	53135218	0.38%	75.88%
RC1184	plasma	3397	62.27%	5260896695	8448623460	99.89%	55987834	91488627	0.25%	38.30%
RC1185	plasma	2830	59.45%	4382761475	7372750050	99.89%	46969637	79749071	0.29%	49.44%
RC1186	tissue	1676	50.05%	2595262227	5185791718	99.64%	26579349	53355743	0.39%	34.12%
RC1187	tissue	1027	59.26%	1590469112	2683813364	99.63%	16187027	27777157	0.59%	8.29%
RC1188	tissue	1334	36.60%	2066472734	5646202872	99.43%	21090615	57593720	0.46%	12.00%
RC1189	tissue	1777	57.83%	2751570391	4757781236	99.58%	28013582	49182010	0.44%	15.46%
RC1191	plasma	3196	45.98%	757766236	1647968850	99.89%	8061095	17144806	0.33%	47.02%
RC1192	tissue	1446	60.18%	2250936541	3740600680	99.77%	28810050	47988753	0.32%	12.55%
RC1193	plasma	4036	59.49%	6282971800	10561718790	99.85%	66810733	114584702	0.40%	43.23%
RC1194	tissue	1639	60.45%	388687462	642970622	99.20%	3851964	6385263	0.37%	43.92%
RC1195	tissue	1077	58.24%	1667490070	2863370284	99.68%	16751819	29760375	0.47%	18.58%
RC1196	tissue	1204	63.64%	1864941404	2930521158	99.56%	18573835	30127656	0.40%	34.62%
RC1197	tissue	1031	57.09%	1604497569	2810410872	99.69%	16277467	29157656	0.42%	4.83%
RC1198	tissue	1041	56.34%	1620886224	2876755414	99.73%	16483602	29923229	0.42%	5.58%
RC1199	tissue	538	30.50%	837187264	2744532758	99.40%	8562537	27957764	0.45%	16.58%
RC1200	tissue	1149	57.03%	1789032018	3136860934	99.59%	18174539	32514493	0.46%	5.72%
RC1201	plasma	2770	58.16%	4289138551	7374778290	99.86%	45635545	79940464	0.39%	43.82%
RC1202	plasma	2002	56.13%	3100528477	5524059690	99.82%	33025087	59728032	0.44%	59.96%
RC1203	plasma	3430	60.38%	5312125272	8797467510	99.88%	56297430	95503261	0.36%	46.03%
RC1204	tissue	626	27.48%	969993287	3530326510	98.83%	9808831	35629560	0.36%	43.58%
RC1205	tissue	1599	60.69%	2475908156	4079361710	99.75%	25058001	42148266	0.41%	17.09%
RC1206	pleural effusion	3423	56.28%	5300157323	9417136400	99.47%	74413113	130905056	0.27%	37.79%
RC1207	tissue	1492	59.84%	2310653241	3861622000	99.46%	21999336	37473436	0.40%	27.67%
RC1208	tissue	1128	67.05%	1746169865	2604227704	99.48%	22295849	33202869	0.24%	19.92%
RC1209	plasma	3615	63.42%	5598021075	8826821730	99.86%	59138138	95676885	0.35%	41.96%
RC1210	tissue	1549	43.39%	1689827986	3894588992	99.49%	26587363	48572036	1.06%	31.35%
RC1211	tissue	1217	58.67%	1893812519	3227901488	99.77%	24250037	41265558	0.32%	15.30%
RC1212	tissue	1346	56.87%	2085109675	3666589448	99.64%	26627840	46671233	0.28%	12.14%
RC1213	plasma	2218	55.42%	3452693681	6229551960	99.69%	36863863	67263994	0.55%	56.48%
RC1214	plasma	1462	18.97%	2275210930	11992018860	99.86%	24254778	127631503	0.40%	21.06%
RC1215	tissue	1682	62.11%	2604615248	4193530162	99.67%	26020943	43418602	0.61%	21.17%
RC1216	tissue	2185	62.21%	3383200003	5438579620	99.76%	33890060	56409474	0.37%	25.16%
RC1218	tissue	1206	54.39%	1868085583	3434539852	99.77%	19110019	35566749	0.38%	16.10%
RC1219	tissue	1339	56.48%	2084099275	3689656208	99.71%	26751685	47349787	0.31%	13.32%
RC1220	peritoneal effusion	2494	56.30%	3881805465	6895204560	99.84%	41171015	74890015	0.41%	25.75%
RC1221	tissue	1453	62.97%	2249439289	3572115056	99.51%	22766087	36993408	0.50%	18.41%
RC1222	tissue	1439	63.32%	2228014297	3518530638	99.72%	22219123	36421392	0.41%	10.58%
RC1223	tissue	1033	61.29%	1599566272	2609744316	99.66%	20371115	33144837	0.29%	30.97%
RC1224	tissue	1226	44.34%	1898314911	4281346600	98.88%	18014909	40973519	0.42%	19.64%
RC1225	tissue	924	60.92%	1431546991	2350037300	99.47%	13599361	22858363	0.41%	18.28%
RC1226	tissue	383	60.38%	592909795	982001174	81.18%	5953779	10096861	0.33%	47.53%
RC1227	plasma	1270	38.66%	1976102385	5111872200	99.78%	21057034	54502524	0.40%	69.67%
RC1228	tissue	1490	50.98%	2306994923	4525650680	99.69%	23416694	46634398	0.43%	11.04%
RC1229	plasma	2612	52.77%	4045364642	7665785100	99.86%	43201192	82839034	0.41%	48.32%
RC1231	tissue	1211	58.82%	1875639436	3188558396	99.30%	19244229	33297841	0.54%	24.37%
RC1232	tissue	626	70.68%	970136933	1372514324	99.40%	12180445	17224415	0.26%	48.94%
RC1233	plasma	3474	57.61%	5378917152	9337434390	99.83%	57307310	100827229	0.42%	33.47%
RC1234	tissue	771	50.93%	1193720138	2343914708	99.47%	15239384	29442578	0.29%	18.98%
RC1235	pleural effusion	1113	43.12%	1723301144	3996338670	99.84%	18457208	42898340	0.42%	43.53%
RC1236	tissue	1684	33.64%	2607895785	7752839410	99.51%	26322032	78951369	0.45%	15.85%
RC1237	tissue	955	61.83%	1478384712	2391141100	99.41%	14023447	23168750	0.41%	28.34%
RC1238	plasma	2750	42.19%	652077059	1545650820	99.86%	6931569	16083685	0.37%	49.80%
RC1239	tissue	1044	56.02%	1616265140	2885148862	99.64%	16402181	29736521	0.38%	20.89%
RC1240	tissue	1985	55.52%	470675909	847809782	99.65%	4718102	8587668	0.45%	18.76%
RC1241	tissue	1355	61.23%	2098623766	3427184540	99.54%	20907908	35283068	0.42%	19.90%
RC1242	tissue	1324	61.48%	2050303255	3335021958	99.53%	20379954	34258518	0.37%	26.38%
RC1243	tissue	1993	60.78%	3085836964	5077045562	99.70%	31106817	52514918	0.45%	30.50%
RC1244	tissue	1144	59.62%	1772001710	2972019338	99.73%	17905553	30710761	0.40%	25.90%
RC1245	pleural effusion	1218	41.57%	288730054	694622610	99.88%	3049851	7231563	0.46%	46.88%
RC1246	tissue	2828	57.82%	670637148	1159806216	99.49%	6632122	11601048	0.35%	33.55%
RC1247	tissue	1259	66.11%	1950021224	2949878744	99.47%	24880250	37574084	0.21%	32.61%
RC1248	tissue	1764	56.66%	2731933784	4821280116	99.64%	27543636	49573837	0.45%	22.00%
RC1249	tissue	1125	51.36%	1742189741	3392145006	99.82%	17766955	34991794	0.40%	21.27%
RC1250	tissue	1014	59.73%	1570803259	2629650846	99.32%	15822976	26830841	0.43%	38.33%
RC1251	tissue	1361	64.09%	2107120424	3287676790	99.55%	21278711	33688721	0.35%	32.22%
RC1252	tissue	1405	62.36%	2176264245	3489678748	99.32%	21767392	35665634	0.38%	31.47%
RC1253	tissue	942	64.37%	1466376210	2277959096	99.64%	18553714	28559849	0.26%	36.37%
RC1254	plasma	3092	58.17%	4813499196	8274689460	99.88%	51487694	89458414	0.34%	36.74%
RC1255	tissue	1489	62.51%	2305130478	3687492160	99.76%	23307549	38214266	0.31%	29.50%
RC1256	tissue	1039	66.46%	1608659956	2420653878	99.13%	16012521	24477887	0.29%	54.51%
RC1257	tissue	3446	44.59%	791319480	1774824170	99.26%	13333088	23820745	1.09%	27.04%
RC1258	plasma	3121	58.39%	4857536638	8318929770	99.88%	51856709	90062392	0.34%	34.57%
RC1260	tissue	1392	58.38%	2155312829	3691754496	99.71%	21740838	38241478	0.47%	18.95%
RC1261	tissue	1745	57.32%	2702791080	4715035958	99.80%	27519990	48982110	0.42%	17.55%
RC1262	tissue	2234	55.43%	3459984723	6242257154	99.73%	34889263	64651861	0.40%	16.86%
RC1263	tissue	1390	62.19%	2152755588	3461342166	99.79%	21508390	35899241	0.37%	21.74%
RC1264	tissue	1088	61.78%	1684106396	2726025004	99.81%	16956266	28378620	0.41%	7.87%
RC1265	tissue	1603	56.60%	2481763579	4384868572	99.53%	25296702	45423657	0.49%	14.11%
RC1266	plasma	2215	62.67%	3430169432	5473228500	99.86%	36569996	59501370	0.39%	48.88%
RC1267	plasma	1164	52.20%	1801787546	3451475970	99.83%	19047664	37053552	0.34%	68.82%
RC1268	tissue	645	68.88%	999514655	1451093792	99.53%	9855268	14847596	0.31%	58.02%
RC1269	tissue	1843	63.05%	2854555498	4527104390	99.83%	28583583	47007089	0.36%	22.88%
RC1270	tissue	1975	55.34%	468401191	846385494	99.78%	4659725	8601281	0.38%	18.30%
RC1271	tissue	1686	66.30%	2611546638	3939212504	99.35%	25887602	40481928	0.36%	27.13%
RC1272	pleural effusion	2135	55.80%	3305732271	5923858860	99.76%	34878019	63581643	0.43%	46.07%
RC1273	tissue	1285	58.02%	1989498987	3428911132	99.68%	20168357	35709603	0.48%	15.39%
RC1274	tissue	662	58.75%	1025287204	1745097122	99.17%	10357116	18037037	0.41%	23.51%
RC1275	plasma	2642	41.48%	626491989	1510417710	99.71%	6623999	15828055	0.36%	42.44%
RC1276	tissue	1428	61.71%	2211482498	3583786566	99.77%	22319354	37316189	0.39%	20.78%
RC1277	tissue	2124	52.97%	503550101	950646064	99.76%	5006159	9670507	0.43%	19.86%
RC1278	plasma	3175	49.64%	752950874	1516764690	99.90%	7982141	15899520	0.34%	50.29%
RC1279	tissue	903	62.18%	1398260045	2248899898	99.68%	14024133	23327273	0.46%	25.57%
RC1280	tissue	283	46.88%	438466111	935260520	99.49%	4361508	9160654	0.36%	81.58%
RC1281	tissue	1044	59.84%	1617403332	2702939696	99.55%	20736833	34511787	0.23%	23.69%
RC1282	tissue	2246	65.65%	3477987261	5297528396	99.54%	44384260	67748333	0.84%	26.71%
RC1283	tissue	1419	48.62%	336560674	692177554	97.89%	3312329	6621012	0.40%	34.94%
RC1284	tissue	2303	60.66%	3566376408	5878835952	99.71%	36072371	60857106	0.34%	24.04%
RC1285	tissue	1832	64.97%	2836226439	4365385286	99.79%	28426584	45343717	0.32%	39.34%
RC1286	plasma	2781	57.48%	4307061921	7493643000	99.86%	45966705	81051072	0.35%	44.68%
RC1287	plasma	2130	65.05%	3297807292	5069971500	99.82%	49209793	74624813	0.34%	56.01%
RC1288	tissue	293	49.06%	453576930	924604296	99.70%	5810018	11457402	0.77%	87.30%
RC1289	tissue	1069	64.75%	1656004481	2557388252	99.63%	16473927	26421822	0.40%	25.99%
RC1290	pleural effusion	2009	49.83%	3110462863	6241736250	99.87%	33335224	67928222	0.45%	15.30%
RC1291	tissue	1365	59.04%	2114494260	3581391728	99.78%	21375755	37158481	0.39%	13.29%
RC1292	tissue	891	58.51%	1380422268	2359245276	99.56%	13689463	23999821	0.38%	64.96%
RC1293	tissue	1761	62.69%	2727239929	4350368598	99.52%	27374430	45085378	0.37%	25.58%
RC1294	plasma	2789	52.13%	661344425	1268688690	99.84%	7024844	13242070	0.46%	49.51%
RC1295	plasma	3101	60.95%	4801940717	7878166290	99.89%	50874803	85466881	0.41%	43.34%
RC1296	plasma	1726	51.80%	2672947917	5160125070	99.84%	28275562	55550240	0.30%	68.01%
RC1297	tissue	949	56.51%	1469602901	2600551078	99.41%	14833759	26764111	0.31%	34.90%
RC1298	plasma	2110	58.38%	3268063136	5597455140	99.79%	34739894	60607680	0.35%	56.28%
RC1299	tissue	1900	59.48%	2942972380	4947645256	99.76%	29589467	51279438	0.37%	26.67%
RC1300	plasma	3141	60.62%	4863293561	8022719700	99.87%	51485332	86649552	0.37%	55.17%
RC1301	tissue	1264	63.69%	1957464421	3073479648	99.38%	19512752	31747166	0.40%	13.75%
RC1302	tissue	1957	64.78%	3030469414	4677961324	99.63%	30157378	48319274	0.37%	18.19%
RC1303	tissue	1891	61.41%	2928635136	4769186632	99.80%	29302814	49412829	0.39%	16.28%
RC1304	tissue	2794	58.60%	662515450	1130511868	99.77%	6566484	11371563	0.37%	20.63%
RC1305	tissue	1172	60.69%	278024647	458112008	99.56%	2732929	4572163	0.36%	30.97%
RC1306	CSF	2103	48.00%	498613342	1038793840	99.49%	6919080	13722094	0.60%	57.61%
RC1307	tissue	1601	47.65%	379750503	796969976	99.43%	3806462	7954780	0.49%	28.67%
RC1308	tissue	1731	60.64%	2679980767	4419180076	99.78%	27056710	45966346	0.39%	15.69%
RC1309	plasma	3424	62.30%	5302654648	8511725070	99.89%	55999236	92446412	0.37%	36.92%
RC1311	plasma	3151	60.29%	4878747164	8091771930	99.89%	51790236	87853179	0.30%	42.31%
RC1312	plasma	3926	54.13%	930906730	1719695250	99.87%	9858453	18076012	0.36%	60.36%
RC1313	tissue	411	26.90%	448075108	1665613492	98.36%	7045646	20104389	0.78%	78.56%
RC1314	plasma	3407	49.62%	807820160	1628085600	99.91%	8549989	17190674	0.29%	50.45%
RC1317	plasma	3750	56.86%	889220971	1563869790	99.90%	9397210	16613253	0.36%	41.72%
RC1318	plasma	4863	58.42%	1153282730	1974230010	99.88%	12179282	20728176	0.32%	59.60%
RC1319	tissue	2035	53.86%	3151233180	5850613298	99.50%	31207897	60067915	0.42%	16.18%
RC1320	plasma	2957	65.15%	4579234115	7028822520	99.82%	48737399	76247240	0.41%	43.08%
RC1321	tissue	2411	53.01%	553537360	1044145608	99.51%	8642162	12871010	0.84%	52.69%
RC1322	plasma	1612	45.33%	370136644	816466420	99.60%	6242977	10767924	0.31%	75.67%
RC1323	plasma	1652	52.10%	379274508	727972210	99.65%	6352182	9768087	0.25%	0.00%
RC1324	tissue	1723	51.59%	395735178	767080692	99.71%	6175545	9516899	0.21%	38.82%
RC1325	tissue	1002	53.47%	229989258	430159924	99.78%	3592605	5388892	0.20%	27.85%
RC1326	plasma	2439	57.11%	560043614	980640430	99.75%	9384750	13191510	0.24%	60.23%
RC1327	plasma	2397	51.95%	550339861	1059301250	99.73%	9218113	14293383	0.21%	0.00%
RC1328	plasma	2053	43.26%	2927219543	6767047280	99.45%	41280757	91929370	0.50%	59.33%
RC1329	tissue	1325	53.12%	1889353309	3556887400	99.37%	23893699	44700803	0.25%	41.47%
